# Supplementary material for: Organocatalytic Asymmetric [2 + 4] Cycloadditions of 3-Vinylindoles with ortho-Quinone Methides
Source: MDPI journal article supplement (doi:10.3390/molecules26216751), 2021-11-08
Supplement: s1 [file s1]

## *Supporting Information for*

### **Organocatalytic Asymmetric [2 + 4] Cycloadditions of 3-Vinyldoles with *ortho*-Quinone Methides**

Si-Jia Liu<sup>a</sup>, Man-Su Tu<sup>a</sup>, Kai-Yue Liu<sup>a</sup>, Jia-Yi Chen<sup>b</sup>, Shao-Fei Ni<sup>\*b</sup>, Yu-Chen Zhang<sup>\*a</sup> and Feng Shi<sup>\*a</sup>

<sup>a</sup>*School of Chemistry and Materials Science, Jiangsu Normal University, Xuzhou, 221116, China*

<sup>b</sup>*Department of Chemistry, Key Laboratory for Preparation and Application of Ordered Structural Materials  
of Guangdong Province, Shantou University, Shantou, 515063, China*

E-mail: [fshi@jsnu.edu.cn](mailto:fshi@jsnu.edu.cn); [zhangyc@jsnu.edu.cn](mailto:zhangyc@jsnu.edu.cn); [sfni@stu.edu.cn](mailto:sfni@stu.edu.cn)

#### **Contents:**

- 1. NMR spectra of products 3 (S2-S23)**
- 2. NMR spectra of products 6 (S24-S39)**
- 3. HPLC spectra of products 3 (S40-S61)**
- 4. HPLC spectra of products 6 (S62-S76)**
- 5. NOE spectrum of product 6ma (S77)**
- 6. X-ray single-crystal data for product 3na (S78-S79)**
- 7. Theoretical calculations of the reaction pathway (S80-S98)**

# 1. NMR spectra of substrates 3

$^1\text{H}$  NMR (400 MHz,  $\text{CDCl}_3$ ) of compound **3aa**: (inseparable diastereomers, 89:11 dr)

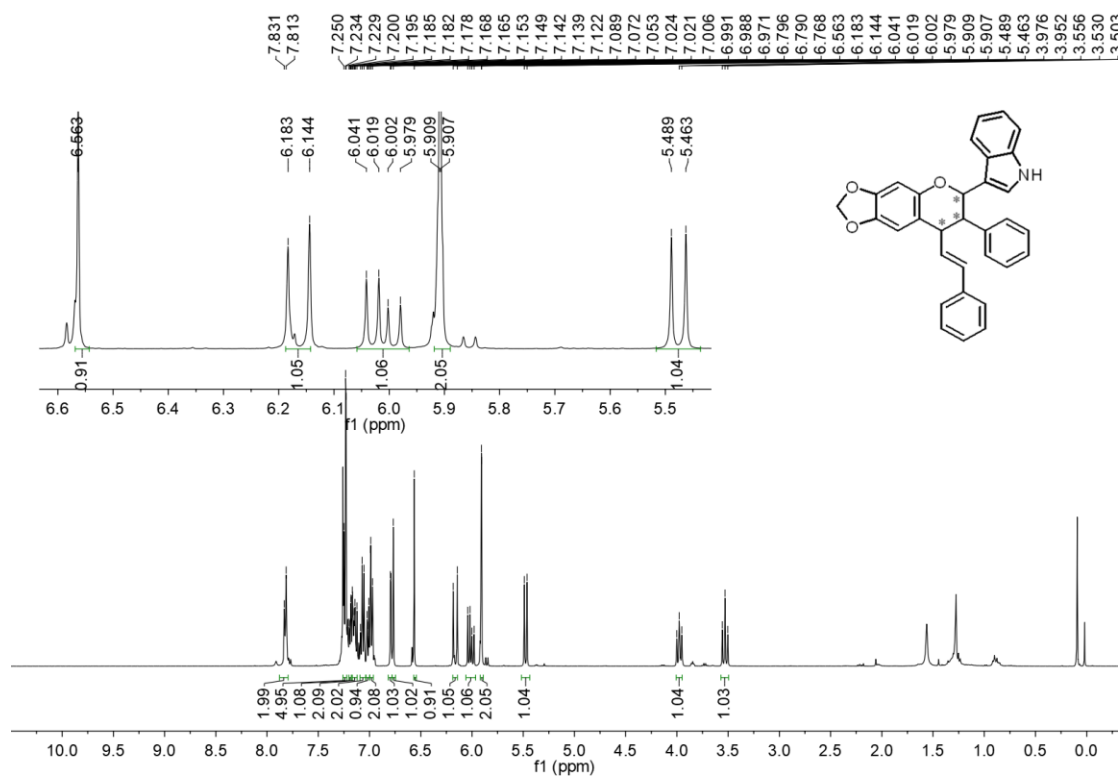

$^{13}\text{C}$  NMR (100 MHz,  $\text{CDCl}_3$ ) of compound **3aa**: (inseparable diastereomers, 89:11 dr)

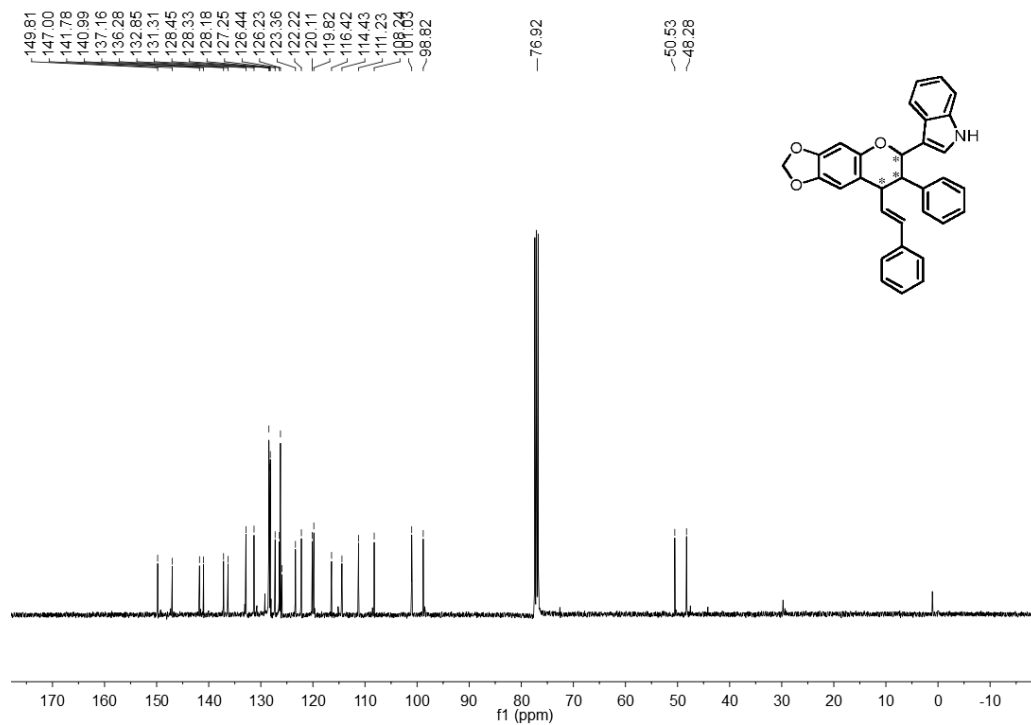

$^1\text{H}$  NMR (400 MHz,  $\text{CDCl}_3$ ) of compound **3ba**: (inseparable diastereomers, 83:17 dr)

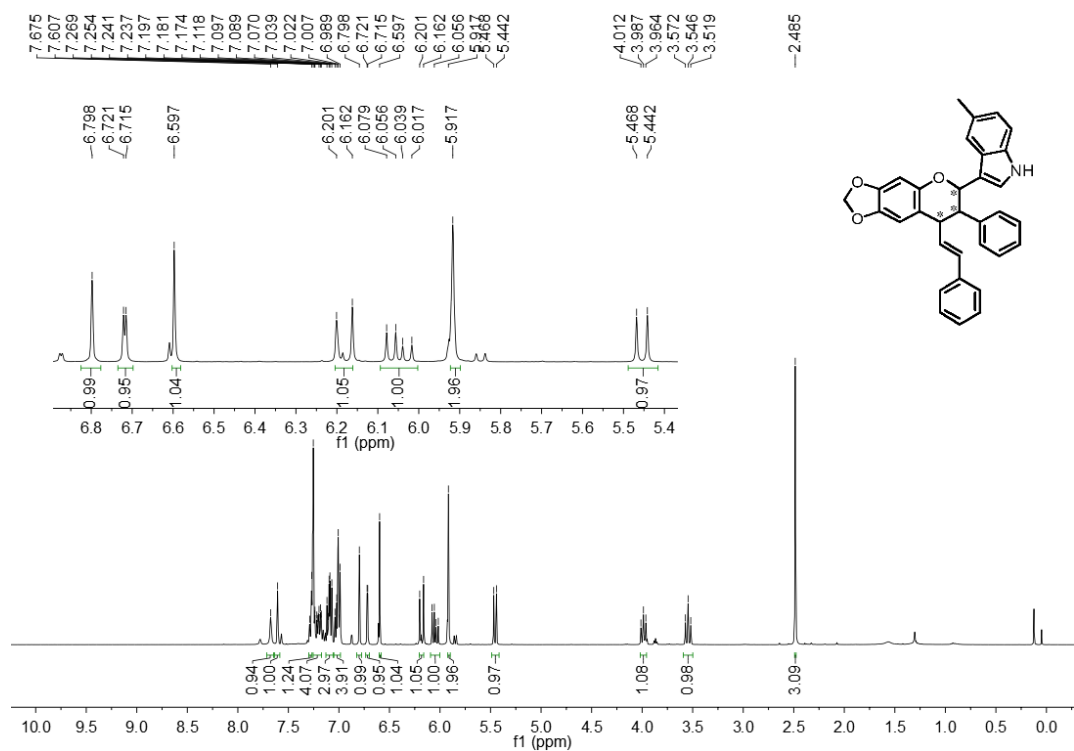

$^{13}\text{C}$  NMR (100 MHz,  $\text{CDCl}_3$ ) of compound **3ba**: (inseparable diastereomers, 83:17 dr)

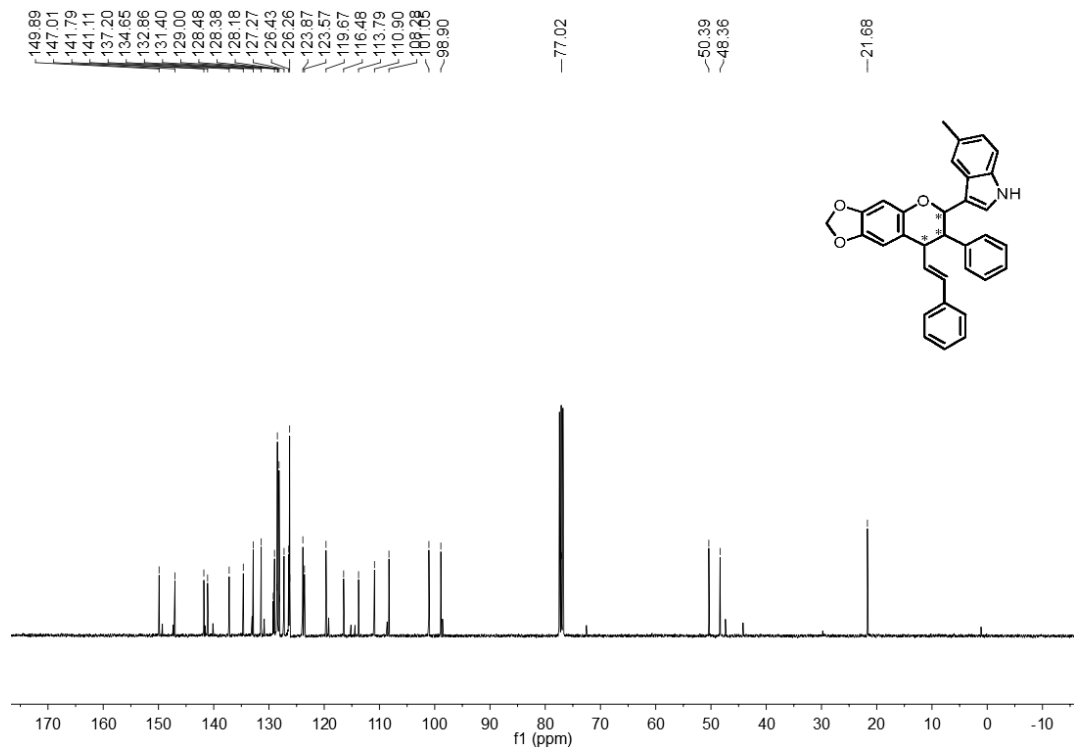

**Chemical structure of compound 10:** O=C1C(=C(C=C1)C(=O)N2C=CC(=C2)c3ccccc3)C(=O)N2C=CC(=C2)c3ccccc3

**<sup>1</sup>H NMR spectrum (CDCl<sub>3</sub>):**

| Chemical Shift (ppm) | Integration |
|----------------------|-------------|
| 8.10 (d)             | 1.94        |
| 7.70 (d)             | 0.07        |
| 7.60 (d)             | 0.09        |
| 7.50 (d)             | 0.09        |
| 7.40 (d)             | 1.01        |
| 7.30 (d)             | 1.99        |
| 7.20 (d)             | 2.07        |
| 7.10 (d)             | 1.00        |
| 7.00 (d)             | 0.99        |
| 6.90 (d)             | 1.03        |
| 6.80 (d)             | 1.06        |
| 6.70 (d)             | 0.91        |
| 6.60 (d)             | 1.00        |
| 6.50 (d)             | 1.00        |
| 6.40 (d)             | 1.00        |
| 6.30 (d)             | 1.00        |
| 6.20 (d)             | 1.00        |
| 6.10 (d)             | 1.00        |
| 6.00 (d)             | 1.00        |
| 5.90 (d)             | 1.00        |
| 5.80 (d)             | 1.00        |
| 5.70 (d)             | 1.00        |
| 5.60 (d)             | 1.00        |
| 5.50 (d)             | 1.00        |
| 5.40 (d)             | 1.00        |
| 5.30 (d)             | 1.00        |
| 5.20 (d)             | 1.00        |
| 5.10 (d)             | 1.00        |
| 5.00 (d)             | 1.00        |
| 4.90 (d)             | 1.00        |
| 4.80 (d)             | 1.00        |
| 4.70 (d)             | 1.00        |
| 4.60 (d)             | 1.00        |
| 4.50 (d)             | 1.00        |
| 4.40 (d)             | 1.00        |
| 4.30 (d)             | 1.00        |
| 4.20 (d)             | 1.00        |
| 4.10 (d)             | 1.00        |
| 4.00 (d)             | 1.00        |
| 3.90 (d)             | 1.00        |
| 3.80 (d)             | 1.00        |
| 3.70 (d)             | 1.00        |
| 3.60 (d)             | 1.00        |
| 3.50 (d)             | 1.00        |
| 3.40 (d)             | 1.00        |
| 3.30 (d)             | 1.00        |
| 3.20 (d)             | 1.00        |
| 3.10 (d)             | 1.00        |
| 3.00 (d)             | 1.00        |
| 2.90 (d)             | 1.00        |
| 2.80 (d)             | 1.00        |
| 2.70 (d)             | 1.00        |
| 2.60 (d)             | 1.00        |
| 2.50 (d)             | 1.00        |
| 2.40 (d)             | 1.00        |
| 2.30 (d)             | 1.00        |
| 2.20 (d)             | 1.00        |
| 2.10 (d)             | 1.00        |
| 2.00 (d)             | 1.00        |
| 1.90 (d)             | 1.00        |
| 1.80 (d)             | 1.00        |
| 1.70 (d)             | 1.00        |
| 1.60 (d)             | 1.00        |
| 1.50 (d)             | 1.00        |
| 1.40 (d)             | 1.00        |
| 1.30 (d)             | 1.00        |
| 1.20 (d)             | 1.00        |
| 1.10 (d)             | 1.00        |
| 1.00 (d)             | 1.00        |
| 0.90 (d)             | 1.00        |
| 0.80 (d)             | 1.00        |
| 0.70 (d)             | 1.00        |
| 0.60 (d)             | 1.00        |
| 0.50 (d)             | 1.00        |
| 0.40 (d)             | 1.00        |
| 0.30 (d)             | 1.00        |
| 0.20 (d)             | 1.00        |
| 0.10 (d)             | 1.00        |
| 0.00 (d)             | 1.00        |

Chemical structure of the compound is shown above the spectrum. The spectrum displays peaks corresponding to the chemical structure, with the following chemical shifts (ppm) labeled above the peaks:

159.99, 149.65, 147.05, 141.89, 140.81, 137.10, 132.98, 131.14, 128.48, 128.31, 128.25, 127.32, 126.57, 126.24, 120.91, 116.42, 114.54, 108.28, 98.78, 97.55, 76.91, 50.72, 48.18.

O=C1C(=C(C=C1)C2=CC=CC=C2)C3=CC=CC=C3C4=CC(=C(C=C4)OC5=CC(=C(C=C5)OC6=CC=CC=C6)OC7=CC=CC=C7)C8=CC=CC=C8



$^1\text{H}$  NMR (400 MHz,  $\text{CDCl}_3$ ) of compound **3da**: (inseparable diastereomers, 91:9 dr)

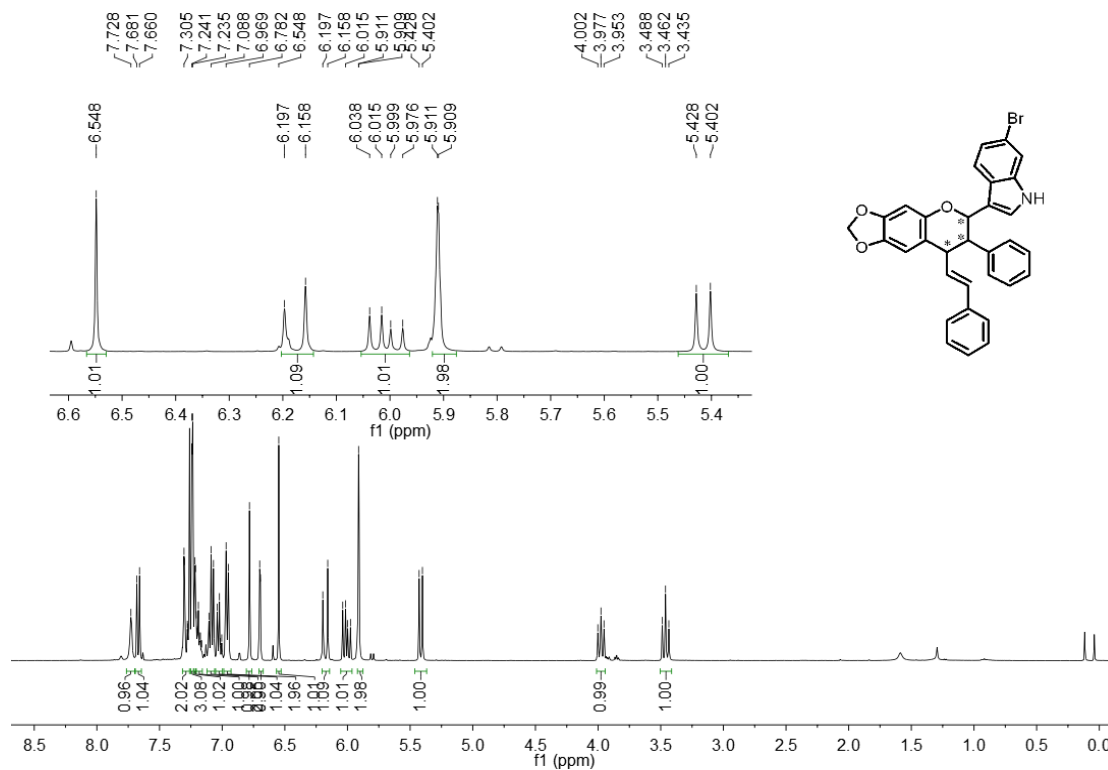

$^{13}\text{C}$  NMR (100 MHz,  $\text{CDCl}_3$ ) of compound **3da**: (inseparable diastereomers, 91:9 dr)

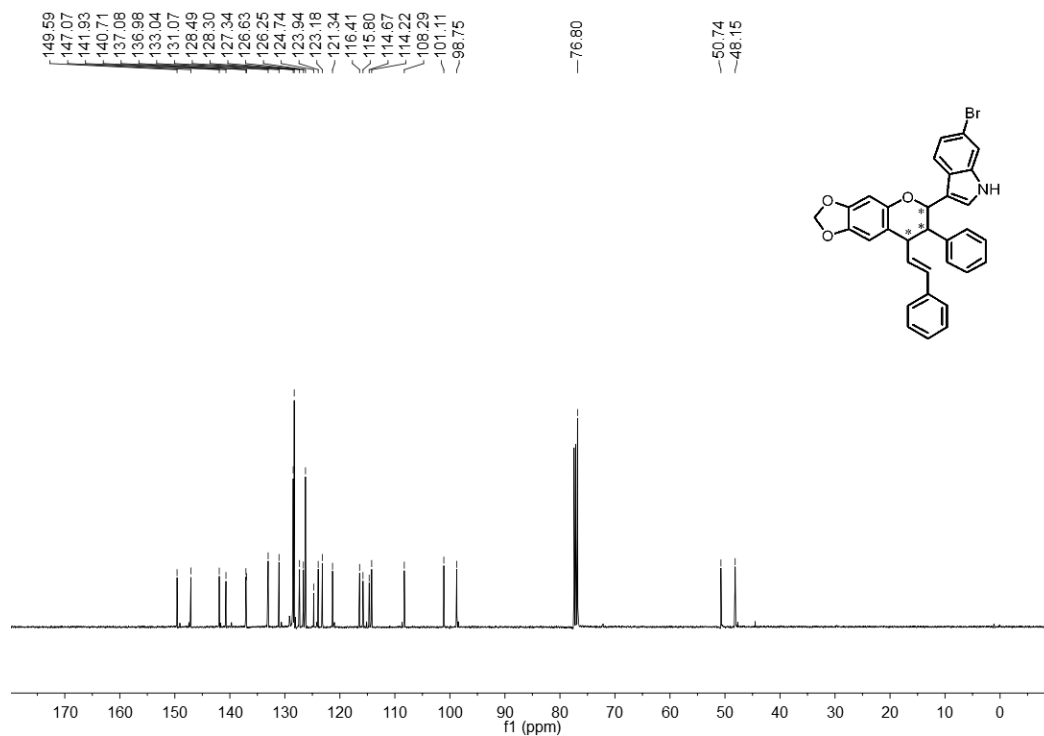

$^1\text{H}$  NMR (400 MHz,  $\text{CDCl}_3$ ) of compound **3ea**: (inseparable diastereomers, 85:15 dr)

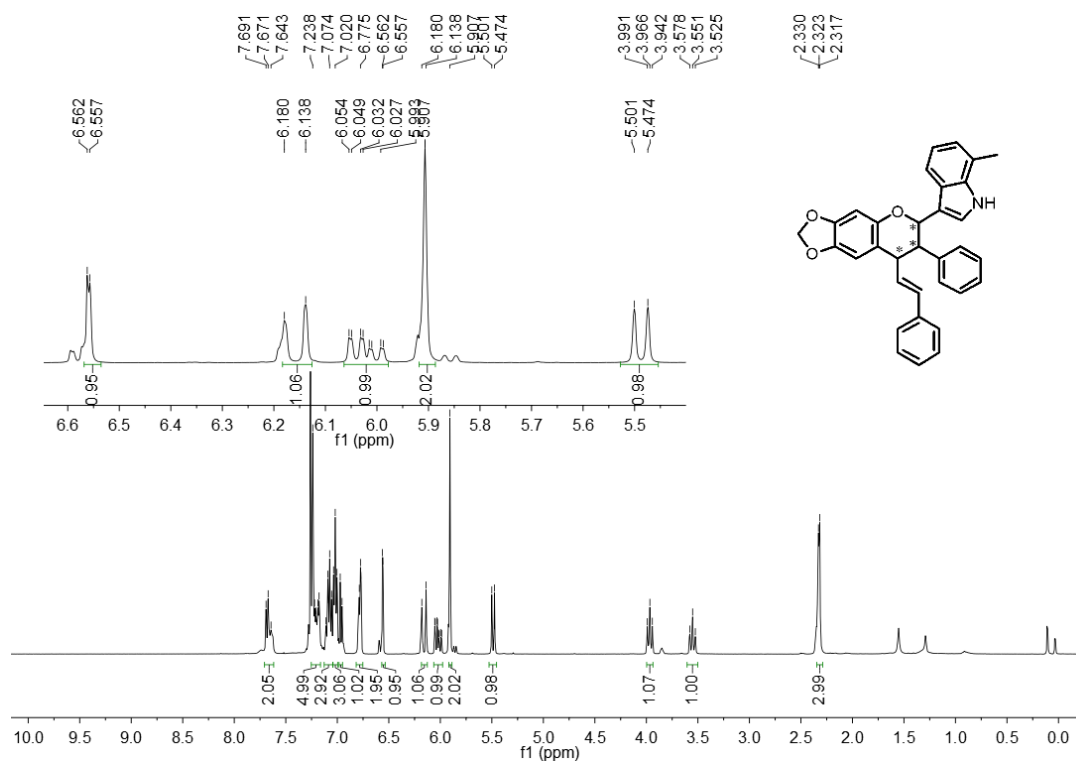

$^{13}\text{C}$  NMR (100 MHz,  $\text{CDCl}_3$ ) of compound **3ea**: (inseparable diastereomers, 85:15 dr)

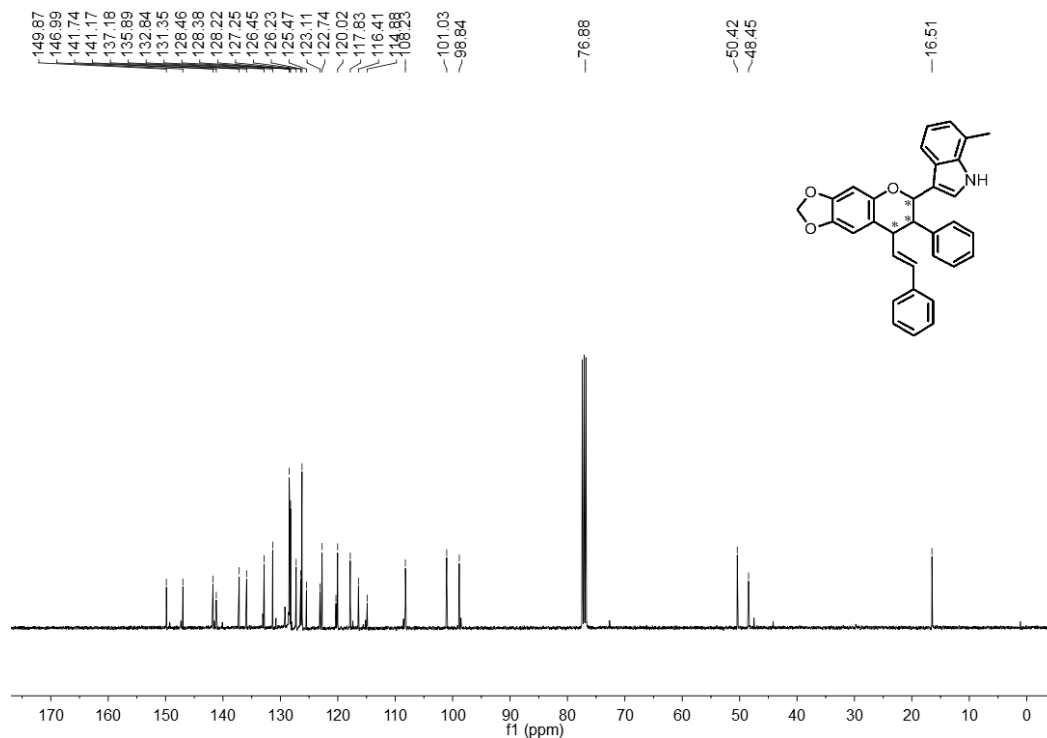

$^1\text{H}$  NMR (400 MHz,  $\text{CDCl}_3$ ) of compound **3fa**: (inseparable diastereomers, 88:12 dr)

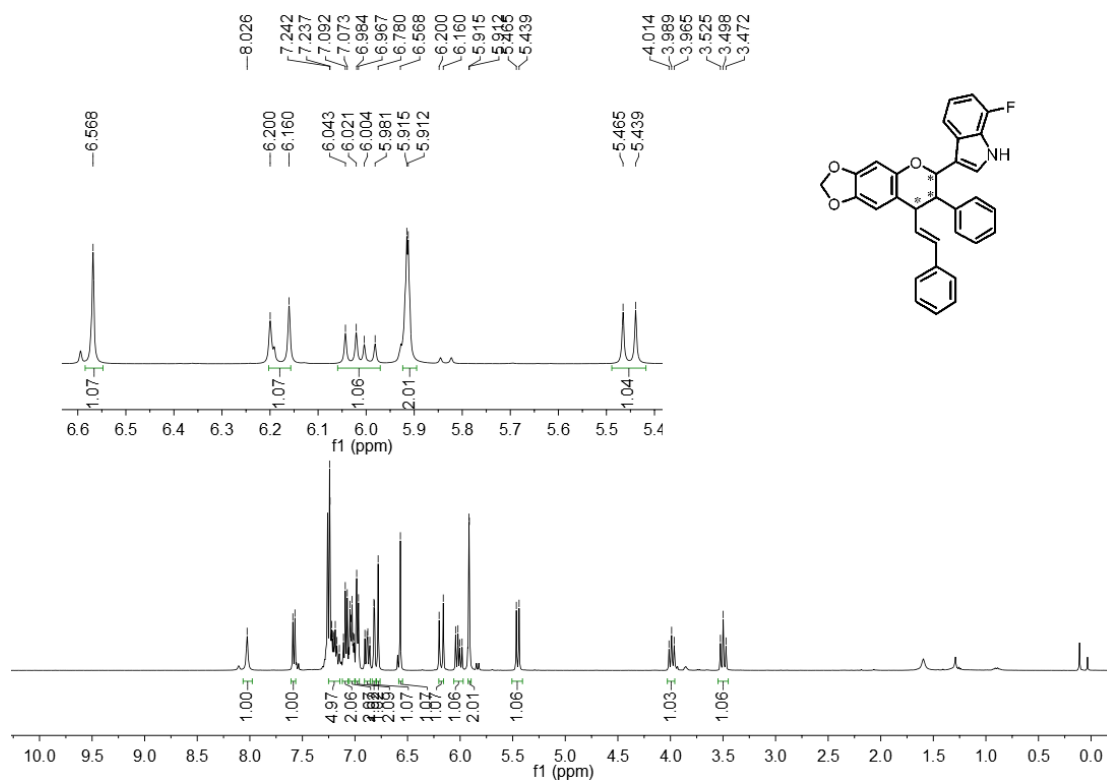

$^{13}\text{C}$  NMR (100 MHz,  $\text{CDCl}_3$ ) of compound **3fa**: (inseparable diastereomers, 88:12 dr)

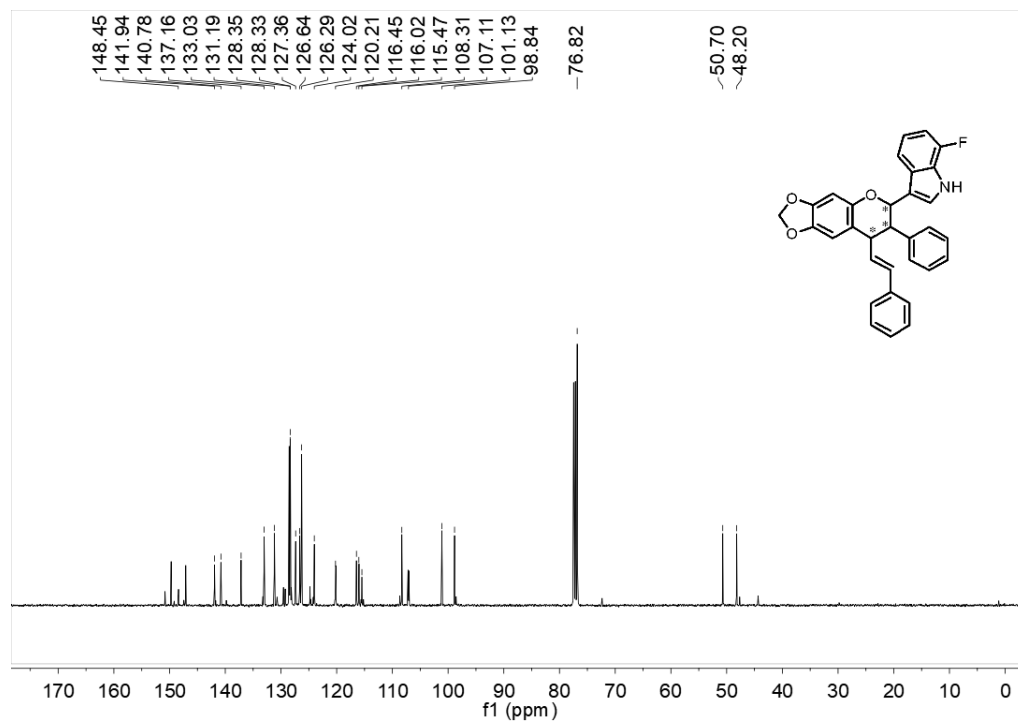

$^1\text{H}$  NMR (400 MHz,  $\text{CDCl}_3$ ) of compound **3ga**: (inseparable diastereomers, 93:7 dr)

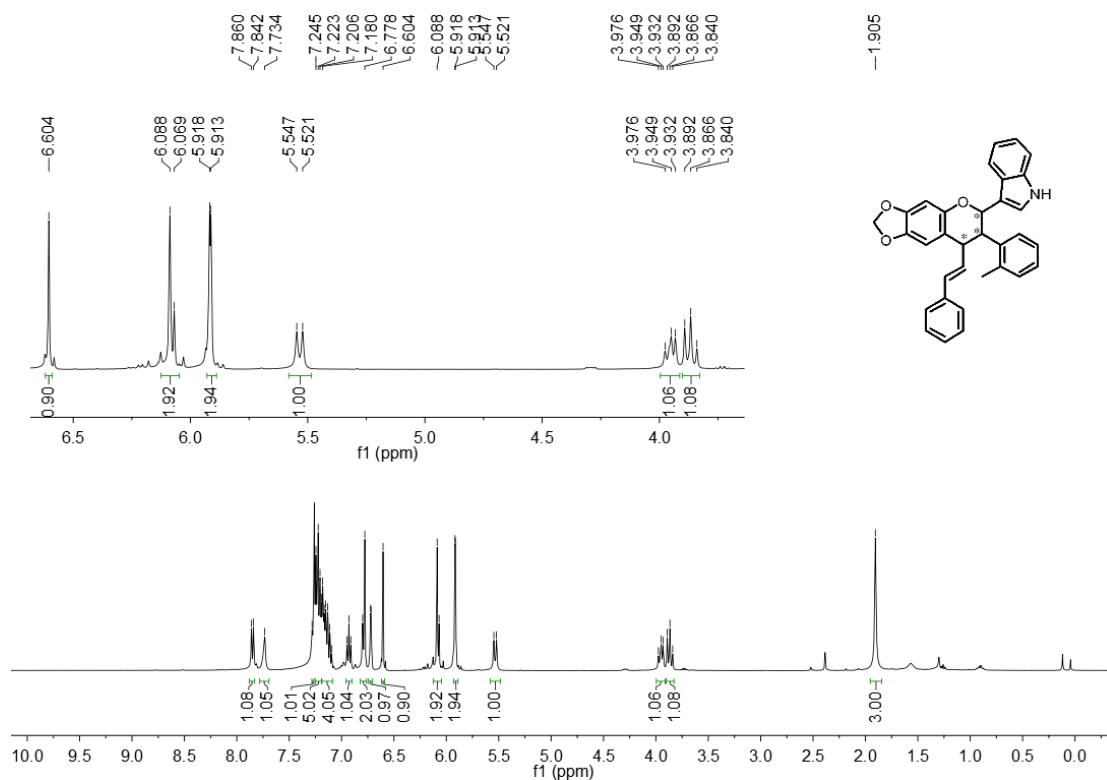

$^{13}\text{C}$  NMR (100 MHz,  $\text{CDCl}_3$ ) of compound **3ga**: (inseparable diastereomers, 93:7 dr)

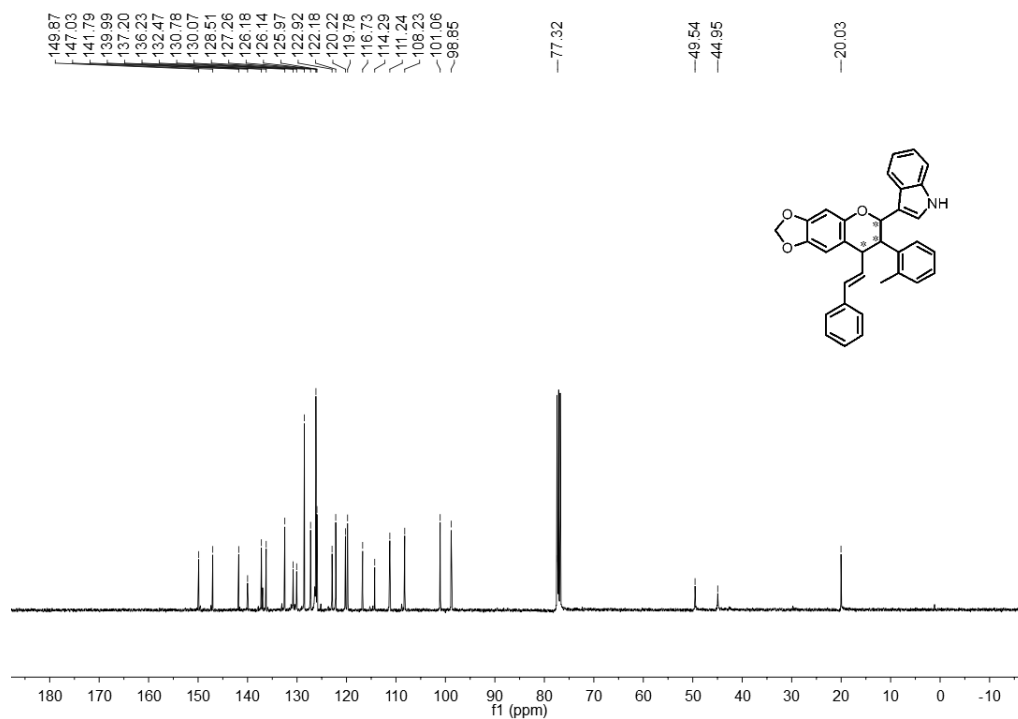

$^1\text{H}$  NMR (400 MHz,  $\text{CDCl}_3$ ) of compound **3ha**: (inseparable diastereomers, 91:9 dr)

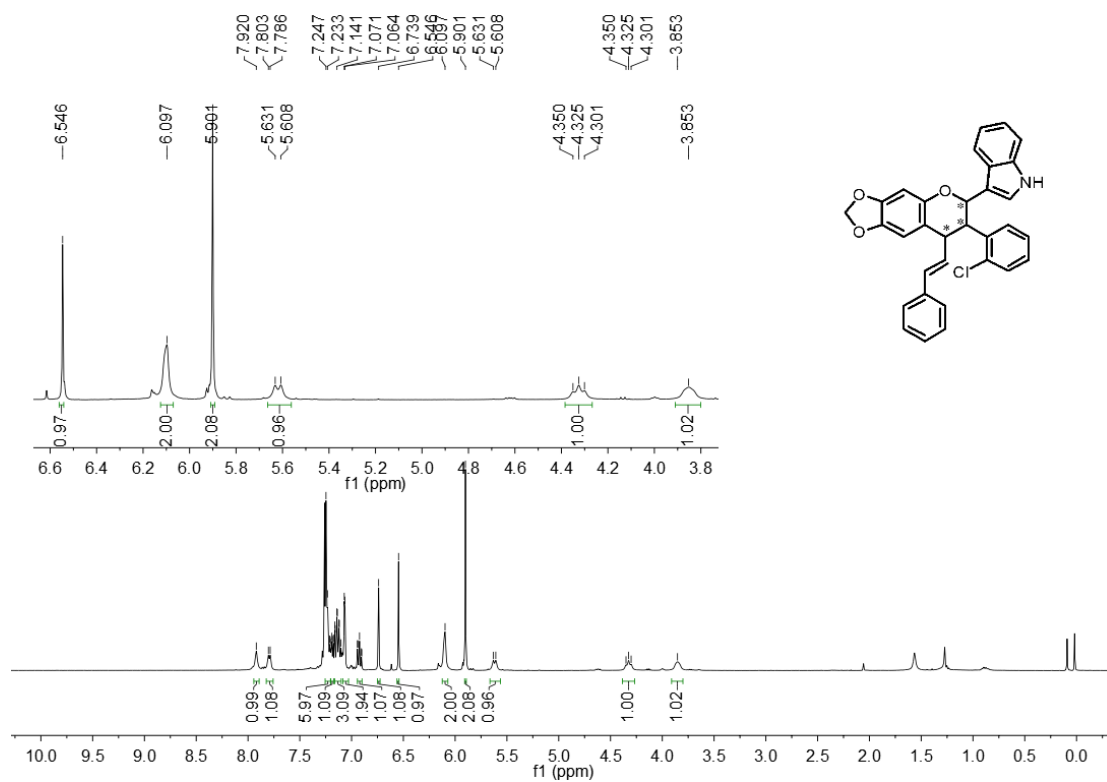

$^{13}\text{C}$  NMR (100 MHz,  $\text{CDCl}_3$ ) of compound **3ha**: (inseparable diastereomers, 91:9 dr)

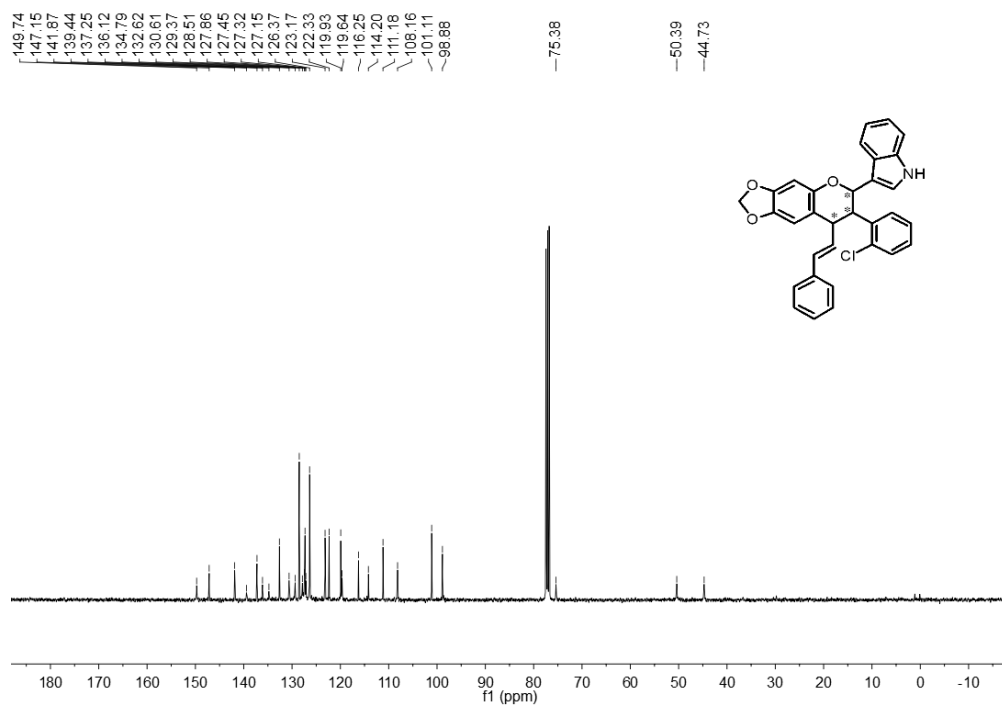

$^1\text{H}$  NMR (400 MHz,  $\text{CDCl}_3$ ) of compound **3ia**: (inseparable diastereomers, 92:8 dr)

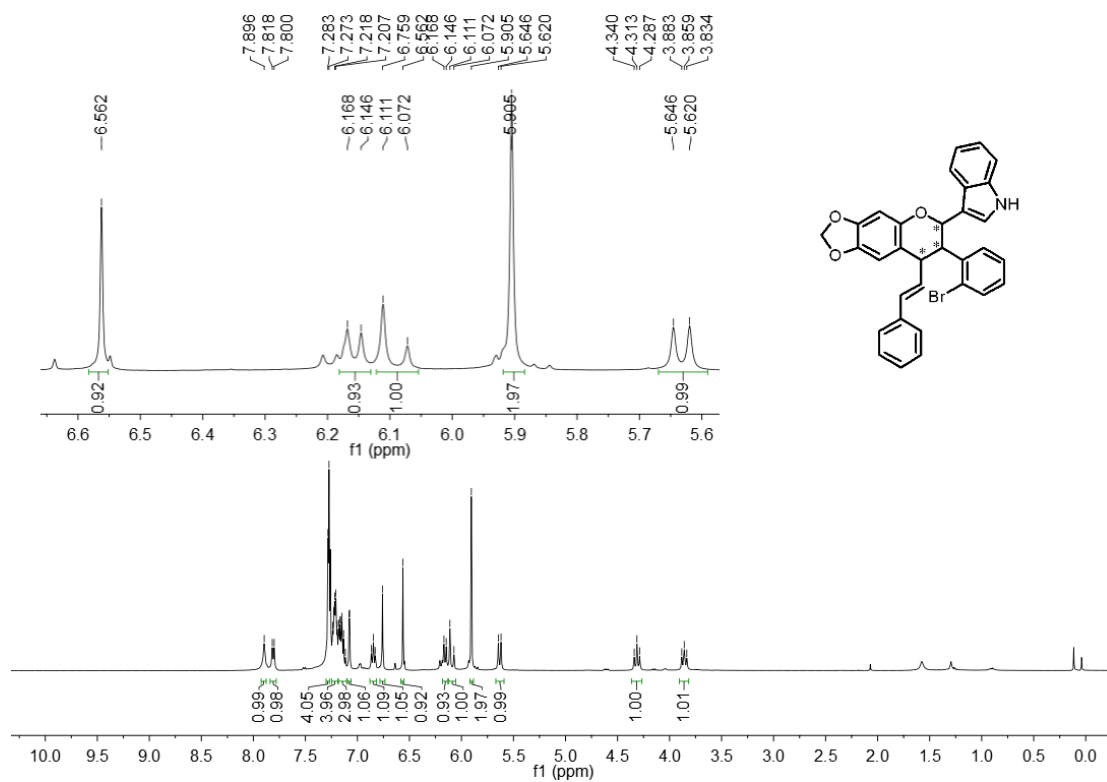

$^{13}\text{C}$  NMR (100 MHz,  $\text{CDCl}_3$ ) of compound **3ia**: (inseparable diastereomers, 92:8 dr)

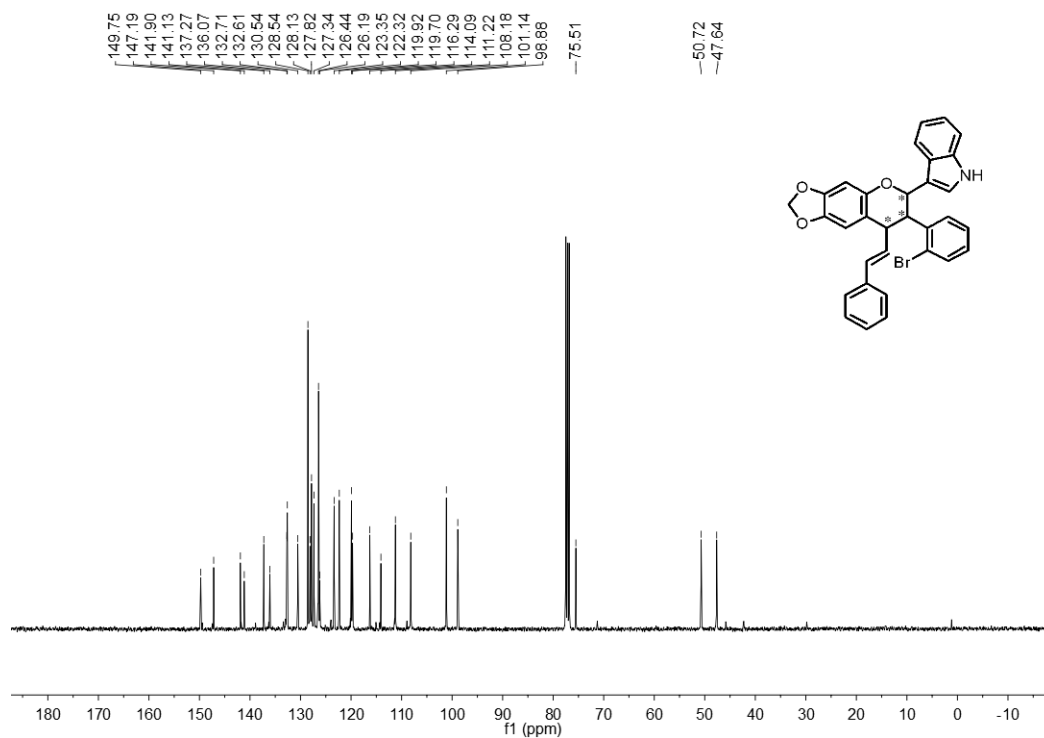

$^1\text{H}$  NMR (400 MHz,  $\text{CDCl}_3$ ) of compound **3ja**: (inseparable diastereomers, 84:16 dr)

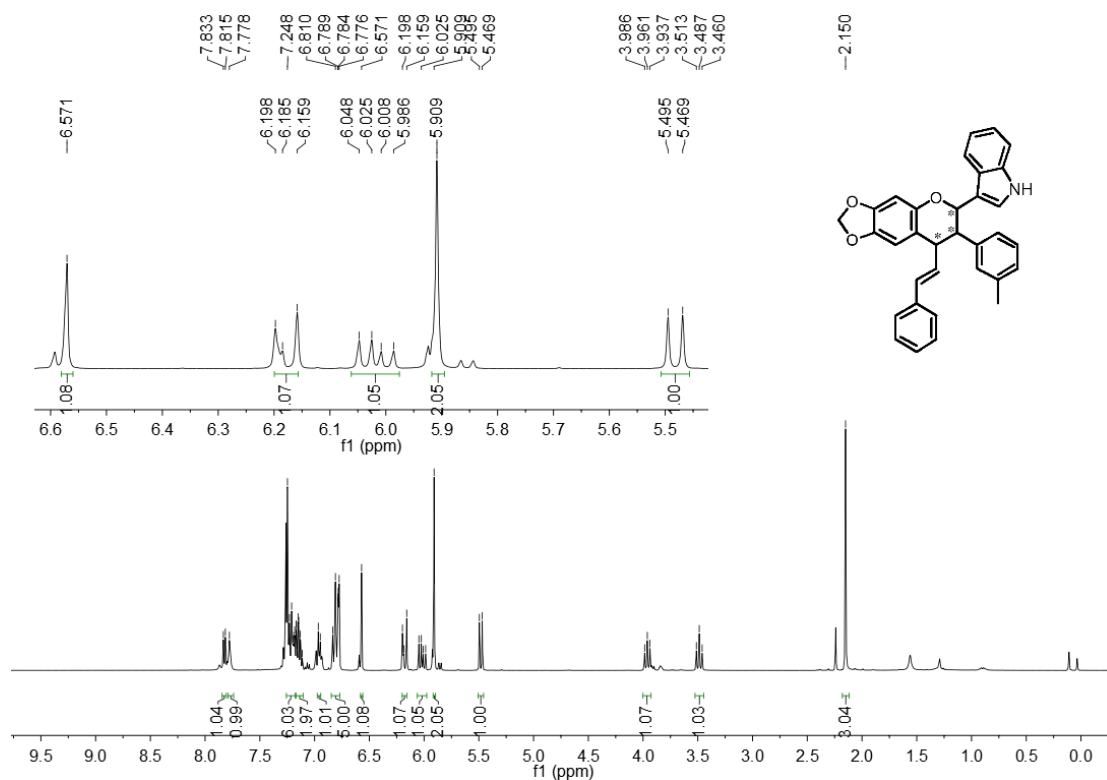

$^{13}\text{C}$  NMR (100 MHz,  $\text{CDCl}_3$ ) of compound **3ja**: (inseparable diastereomers, 84:16 dr)

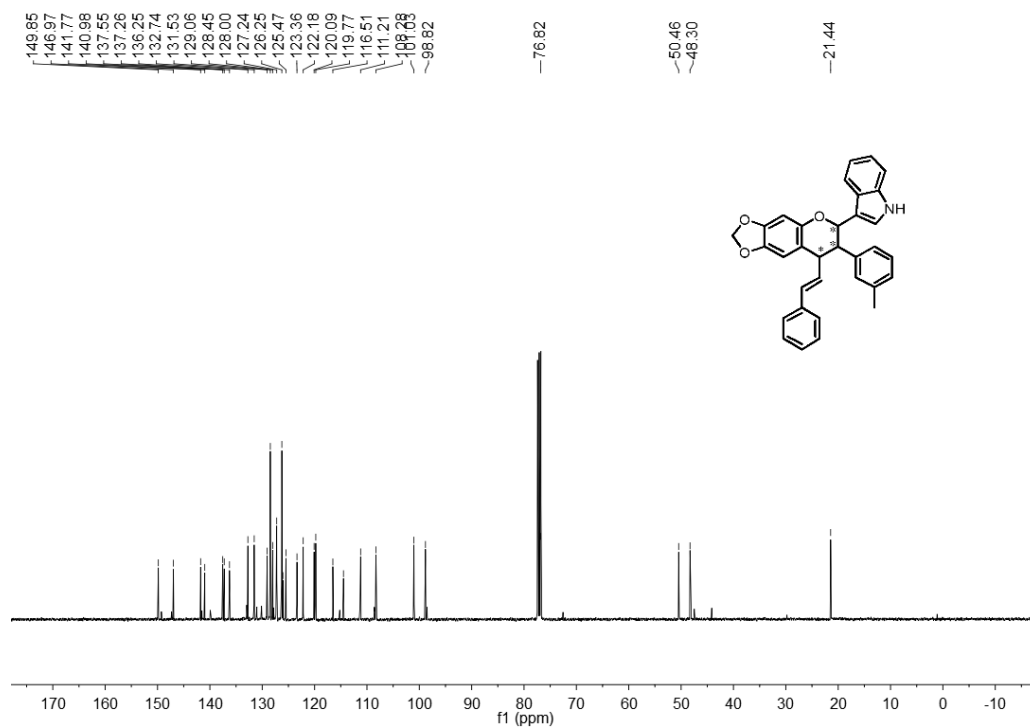

$^1\text{H}$  NMR (400 MHz,  $\text{CDCl}_3$ ) of compound **3ka**: (inseparable diastereomers, 87:13 dr)

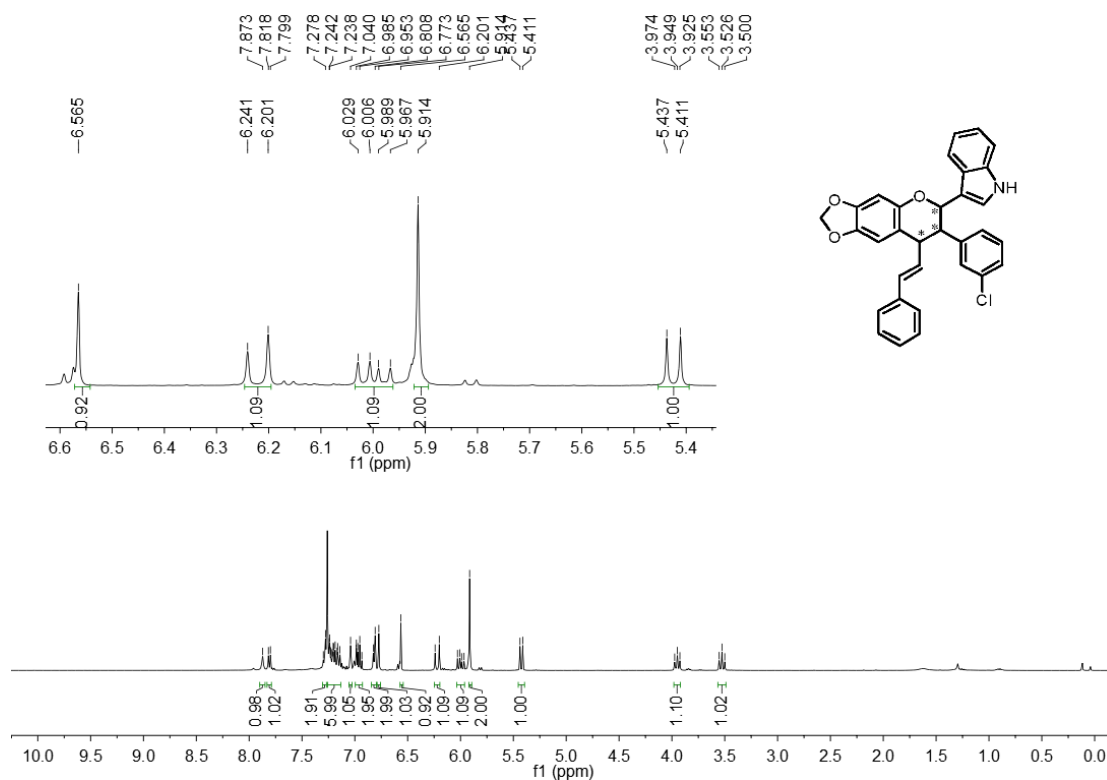

$^{13}\text{C}$  NMR (100 MHz,  $\text{CDCl}_3$ ) of compound **3ka**: (inseparable diastereomers, 87:13 dr)

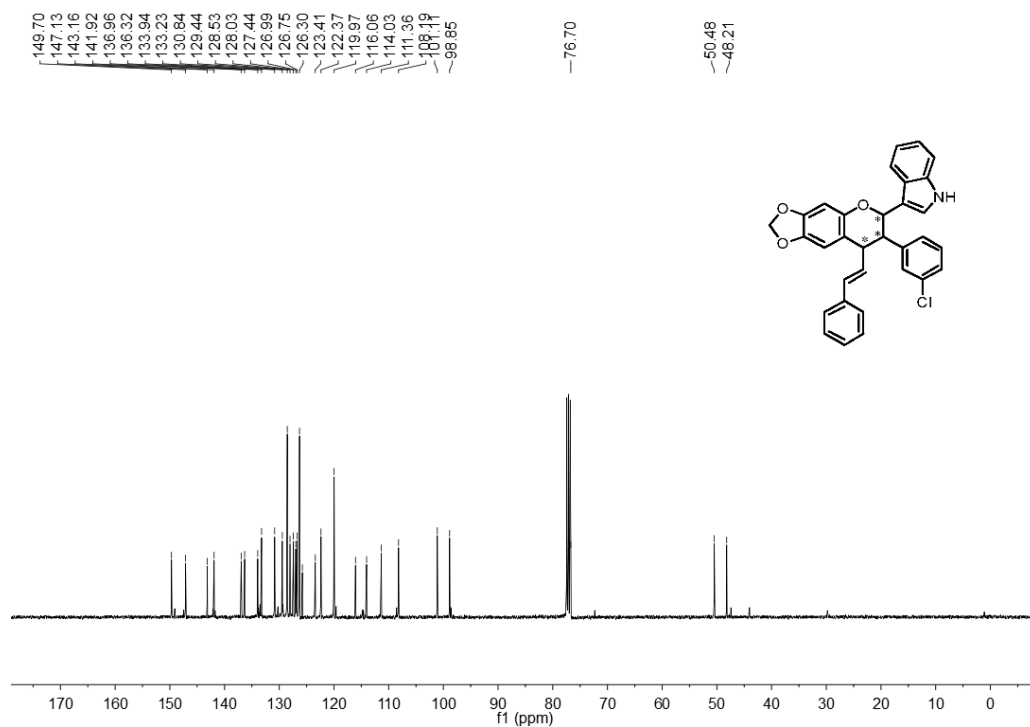



$^1\text{H}$  NMR (400 MHz,  $\text{CDCl}_3$ ) of compound **3la**: (inseparable diastereomers, 78:22 dr)

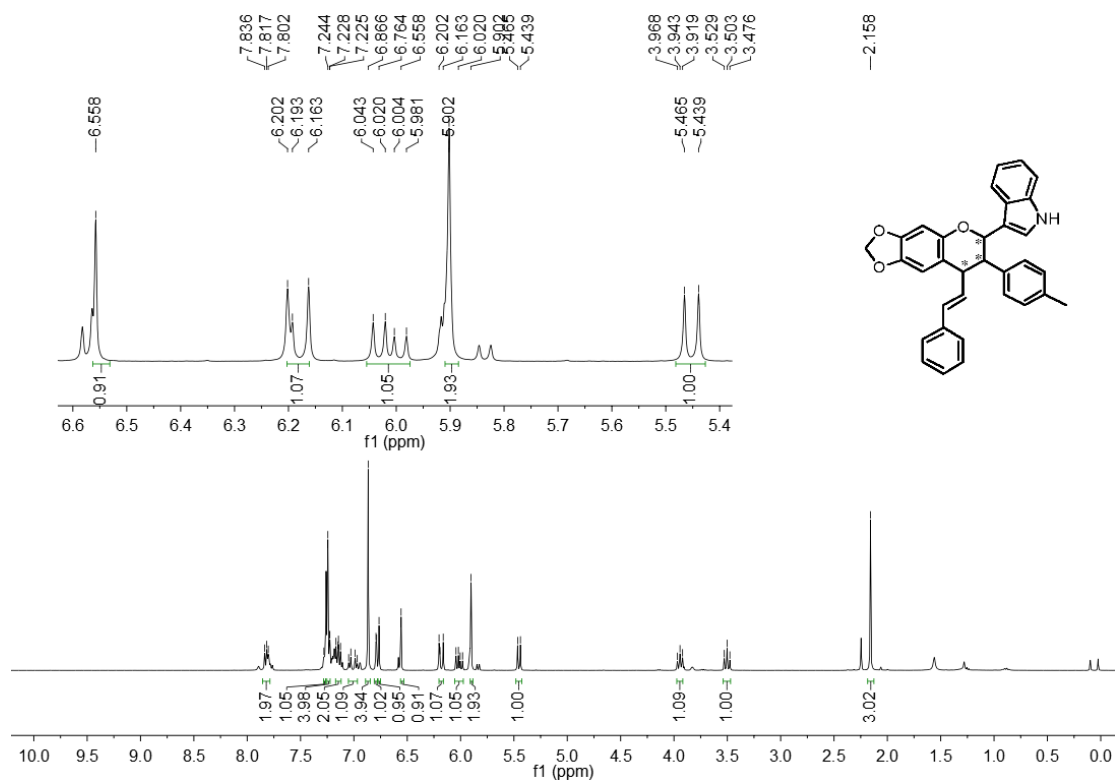

$^{13}\text{C}$  NMR (100 MHz,  $\text{CDCl}_3$ ) of compound **3la**: (inseparable diastereomers, 78:22 dr)

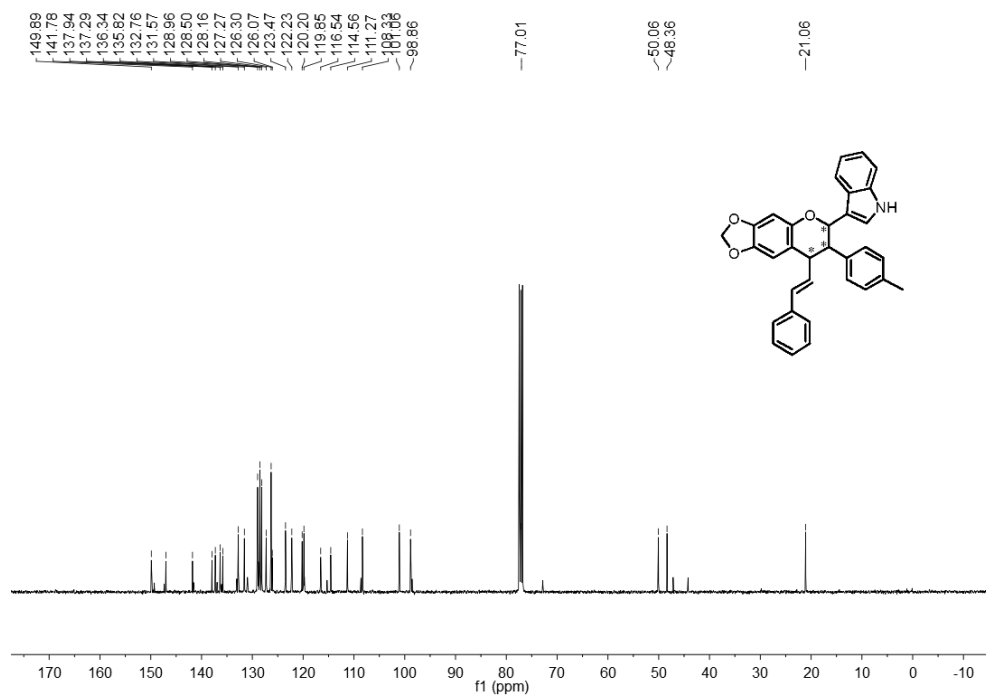

$^1\text{H}$  NMR (400 MHz,  $\text{CDCl}_3$ ) of compound **3ma**: (inseparable diastereomers, 84:16 dr)

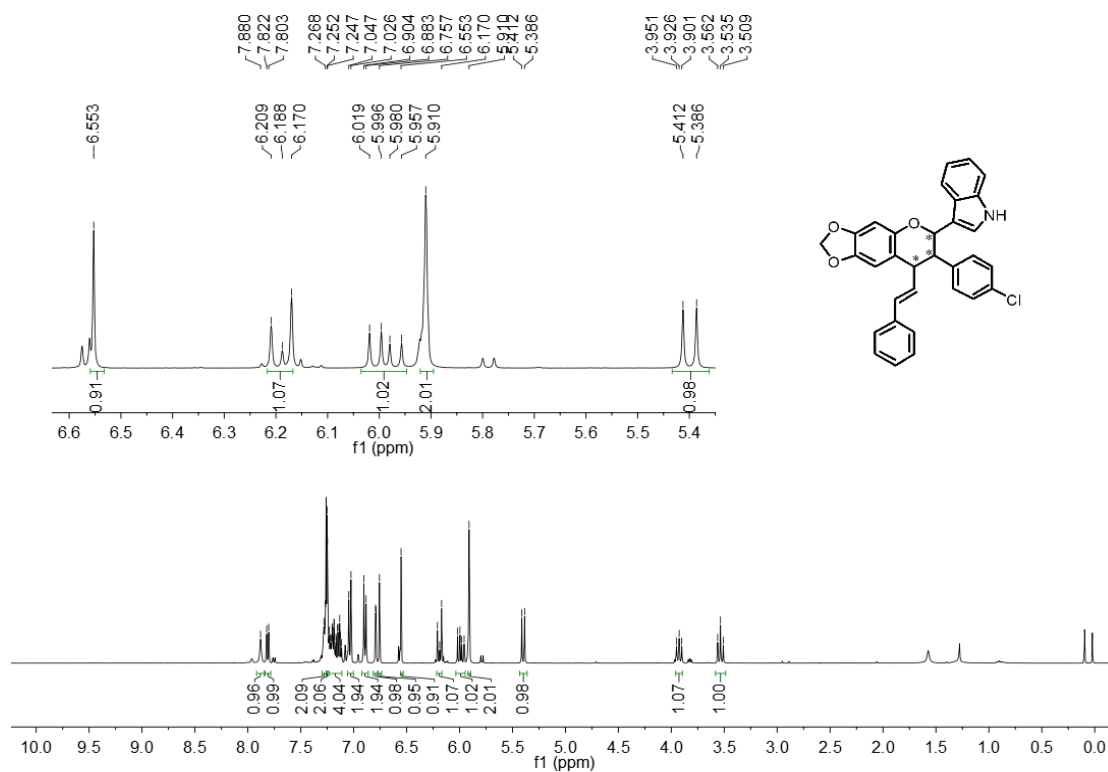

$^{13}\text{C}$  NMR (100 MHz,  $\text{CDCl}_3$ ) of compound **3ma**: (inseparable diastereomers, 84:16 dr)

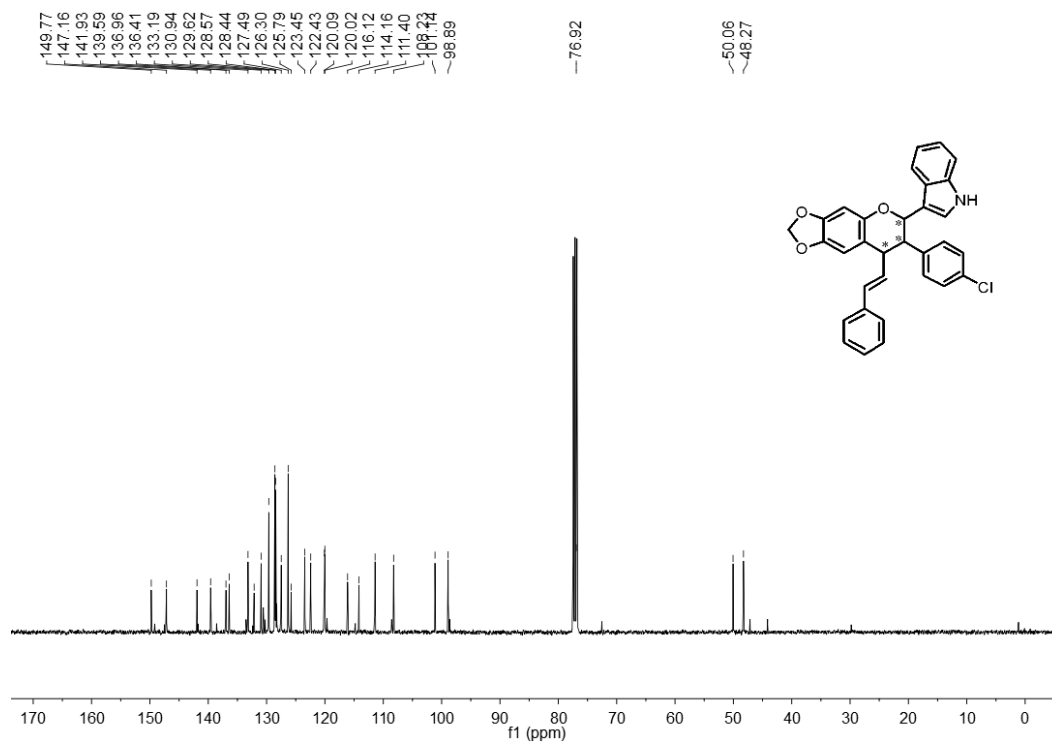

$^1\text{H}$  NMR (400 MHz, acetone- $d_6$ ) of **3na**: (inseparable diastereomers, 86:14 dr)

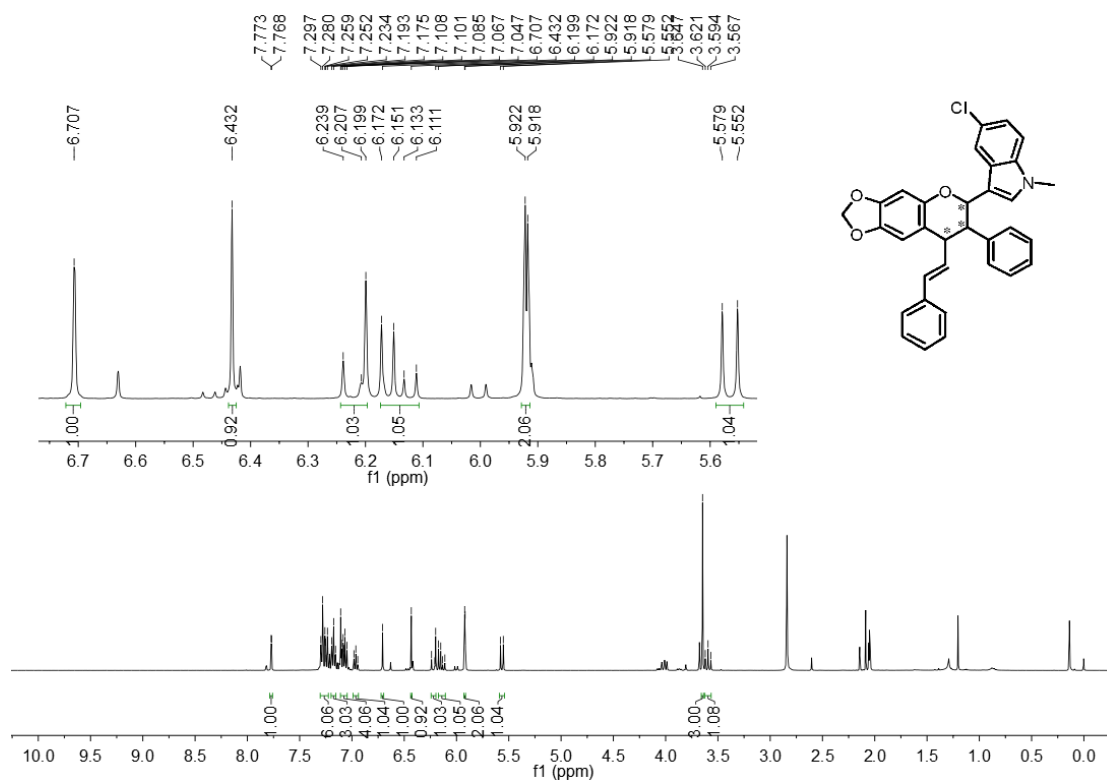

$^{13}\text{C}$  NMR (100 MHz, acetone- $d_6$ ) of **3na**: (inseparable diastereomers, 86:14 dr)

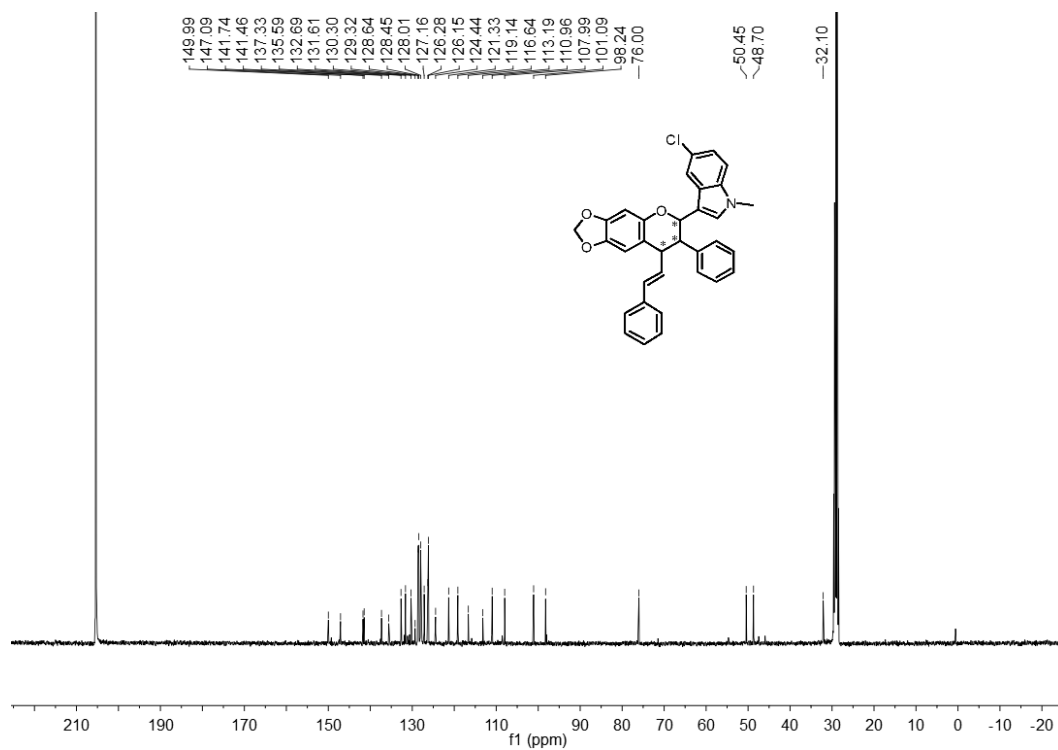

$^1\text{H}$  NMR (400 MHz,  $\text{CDCl}_3$ ) of compound **30a**: (inseparable diastereomers, 91:9 dr)

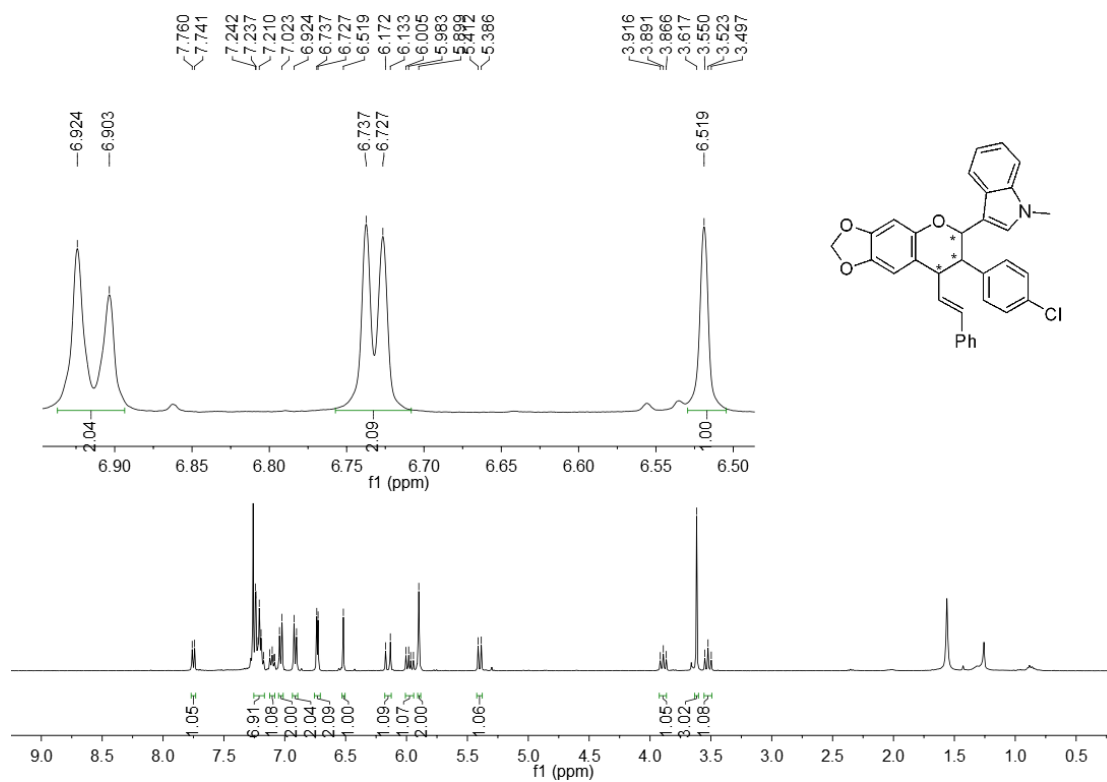

$^{13}\text{C}$  NMR (100 MHz,  $\text{CDCl}_3$ ) of compound **30a**: (inseparable diastereomers, 91:9 dr)

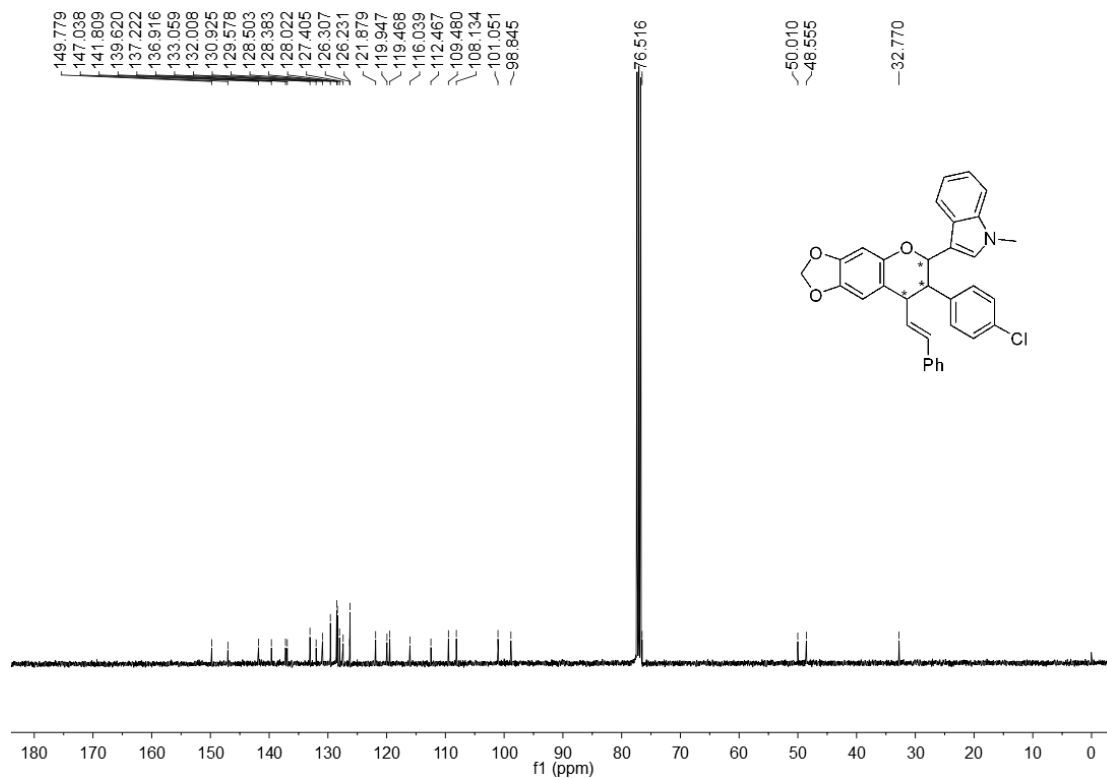

$^1\text{H}$  NMR (400 MHz,  $\text{CDCl}_3$ ) of compound **3ab**: (inseparable diastereomers, 88:12 dr)

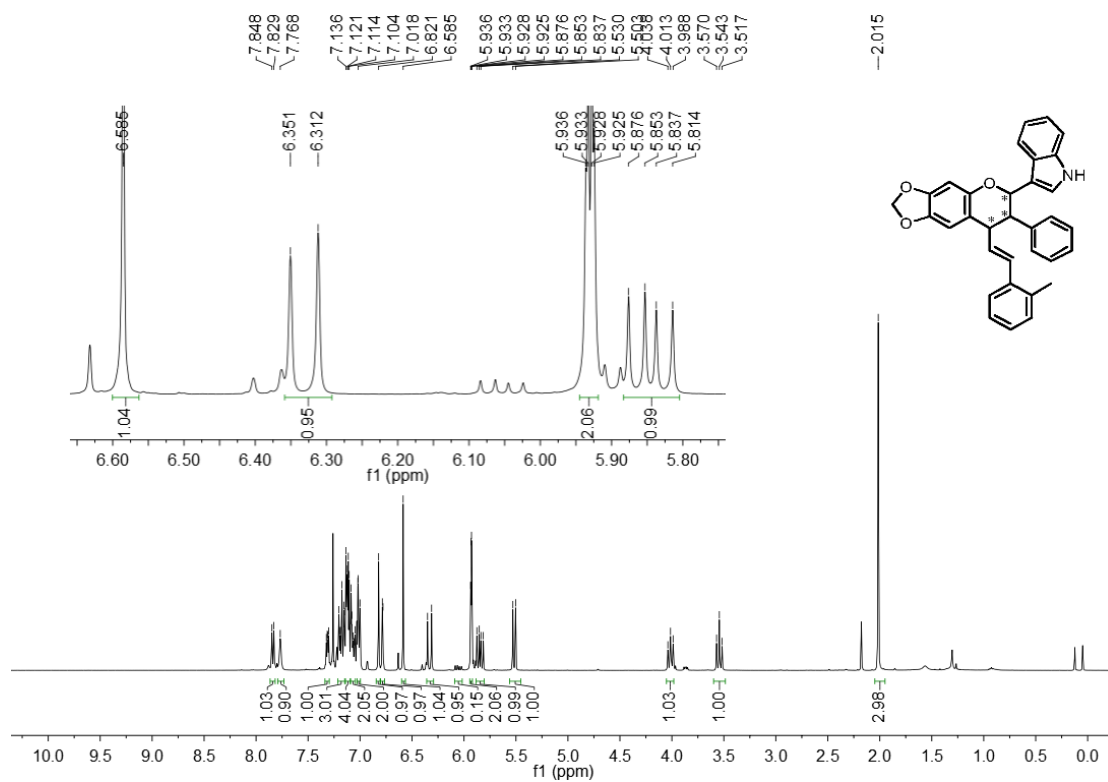

$^{13}\text{C}$  NMR (100 MHz,  $\text{CDCl}_3$ ) of compound **3ab**: (inseparable diastereomers, 88:12 dr)

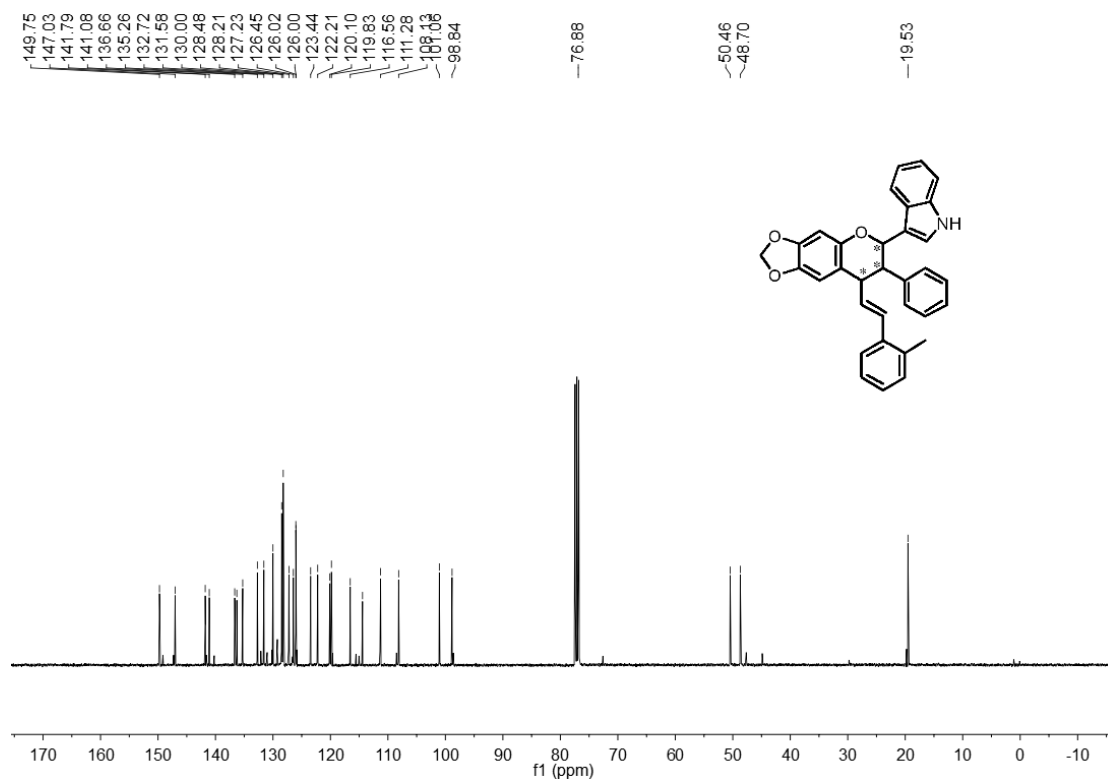

$^1\text{H}$  NMR (400 MHz,  $\text{CDCl}_3$ ) of compound **3ac**: (inseparable diastereomers, 86:14 dr)

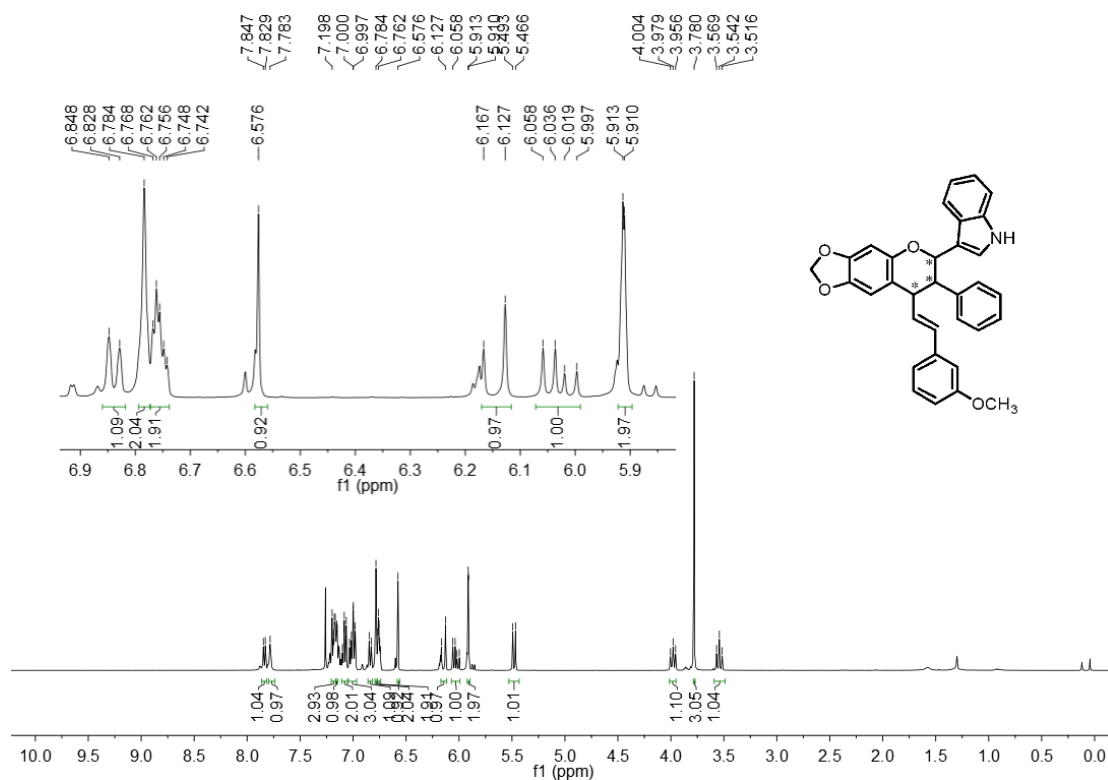

$^{13}\text{C}$  NMR (100 MHz,  $\text{CDCl}_3$ ) of compound **3ac**: (inseparable diastereomers, 86:14 dr)

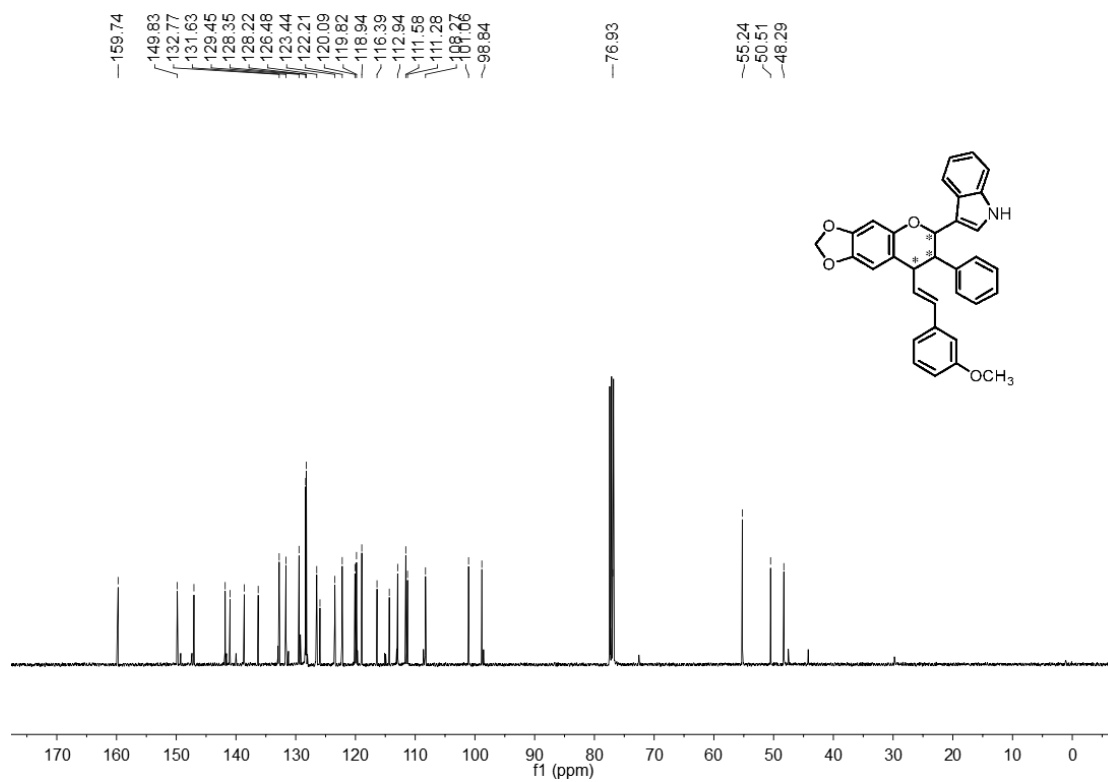

$^1\text{H}$  NMR (400 MHz,  $\text{CDCl}_3$ ) of compound **3ad**: (inseparable diastereomers, 85:15 dr)

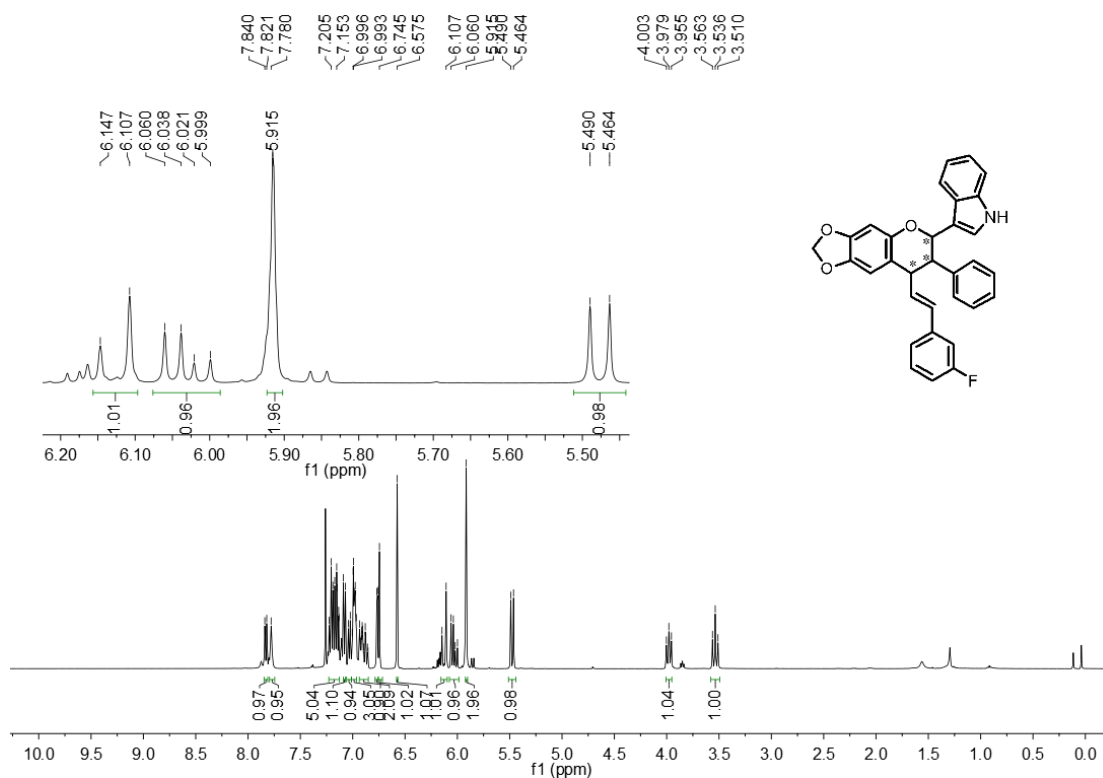

$^{13}\text{C}$  NMR (100 MHz,  $\text{CDCl}_3$ ) of compound **3ad**: (inseparable diastereomers, 85:15 dr)

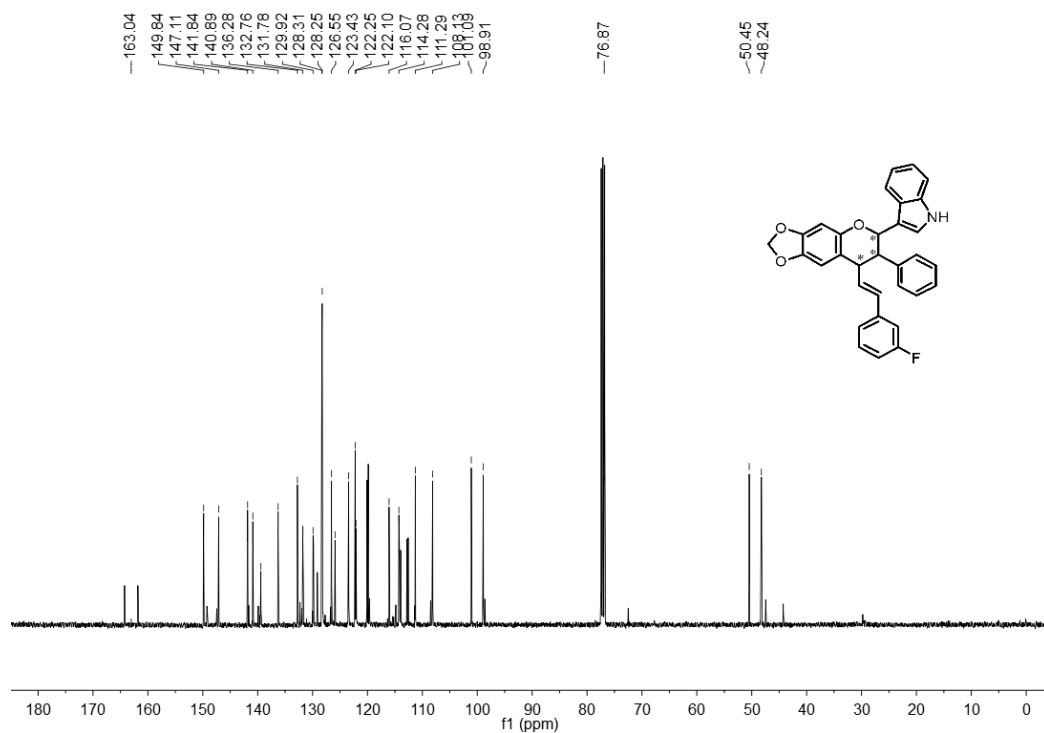

$^1\text{H}$  NMR (400 MHz, acetone- $d_6$ ) of **3ae**: (inseparable diastereomers, 89:11 dr)

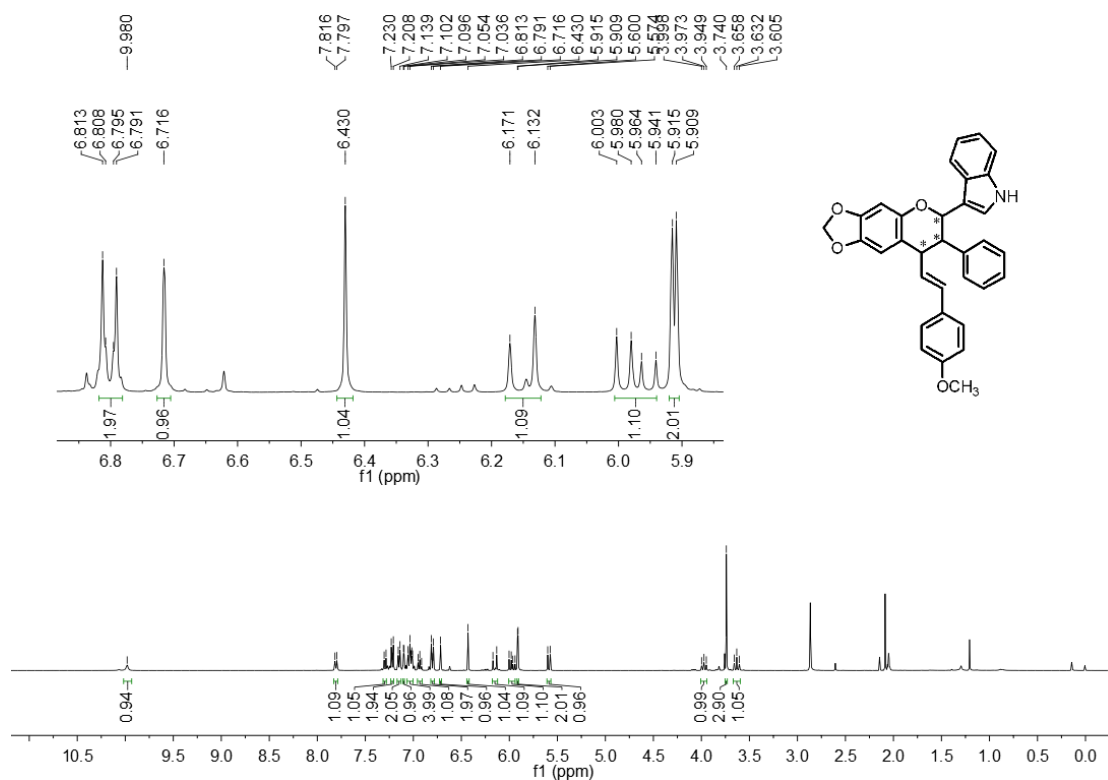

$^{13}\text{C}$  NMR (100 MHz, acetone- $d_6$ ) of **3ae**: (inseparable diastereomers, 89:11 dr)

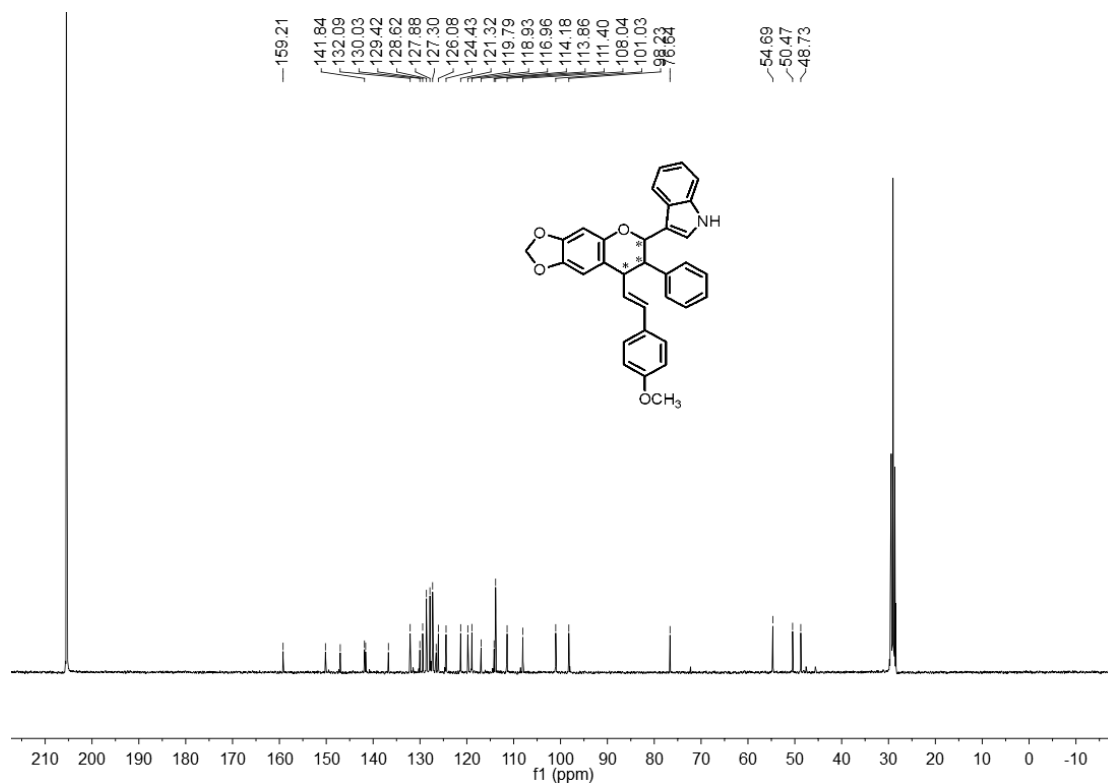



$^1\text{H}$  NMR (400 MHz,  $\text{CDCl}_3$ ) of compound **3af**: (inseparable diastereomers, 75:25 dr)

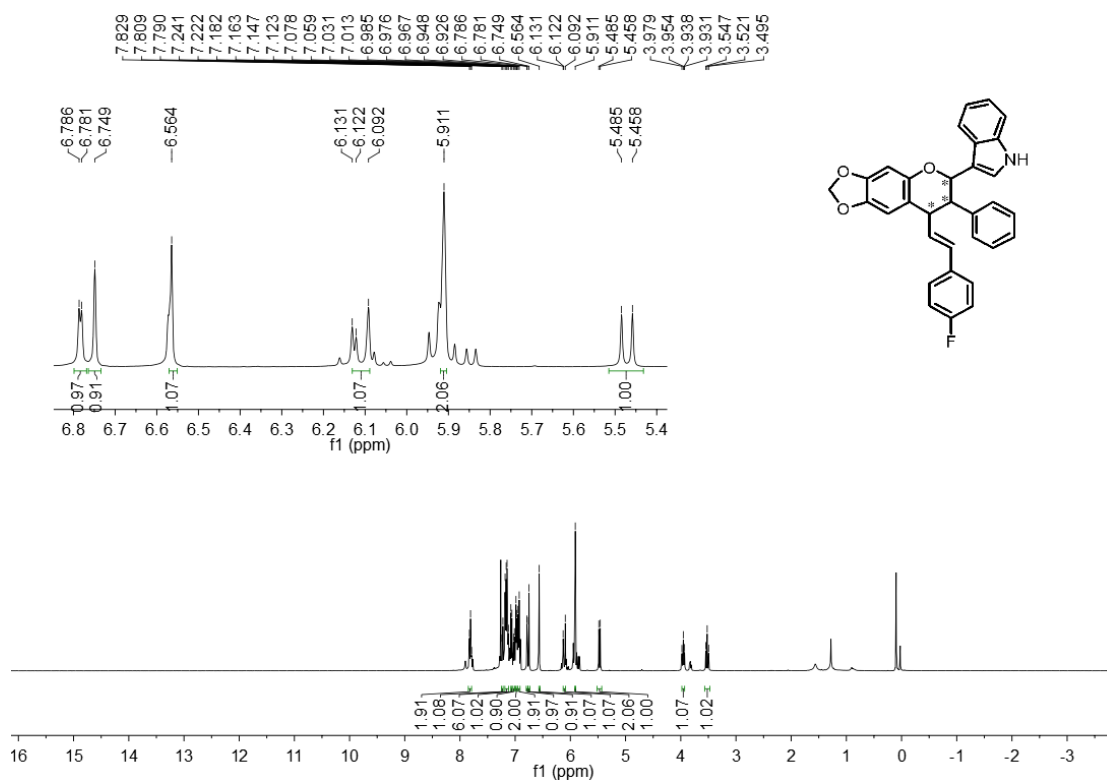

$^{13}\text{C}$  NMR (100 MHz,  $\text{CDCl}_3$ ) of compound **3af**: (inseparable diastereomers, 75:25 dr)

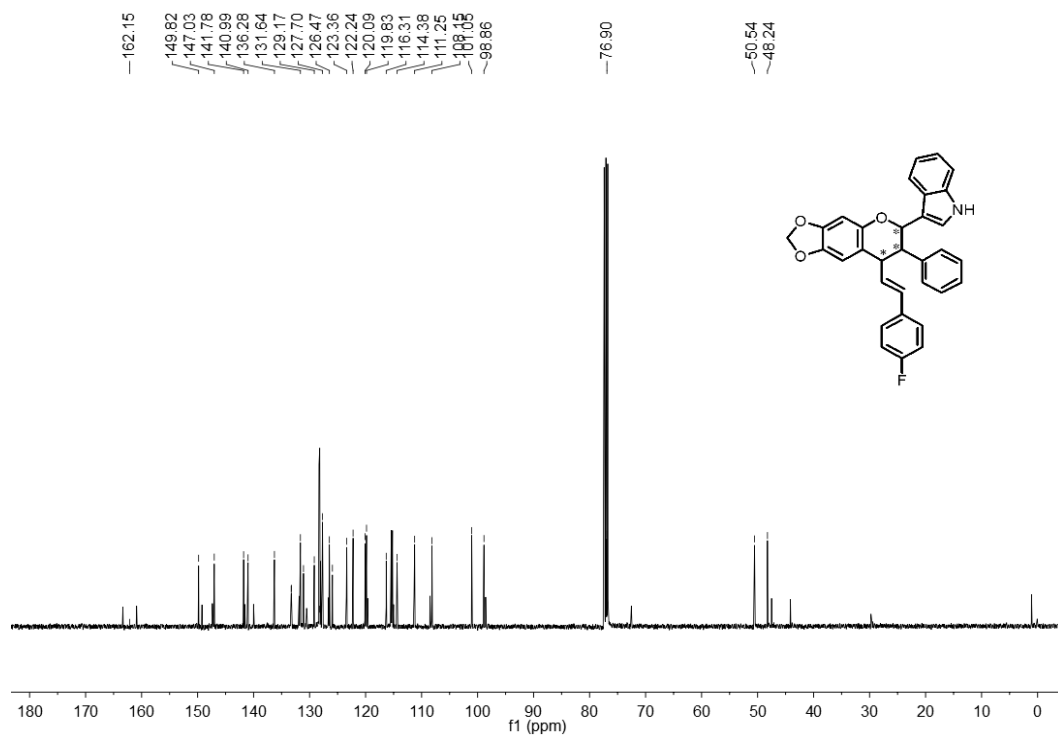

$^1\text{H}$  NMR (400 MHz,  $\text{CDCl}_3$ ) of compound **3ag**: (inseparable diastereomers, 84:16 dr)

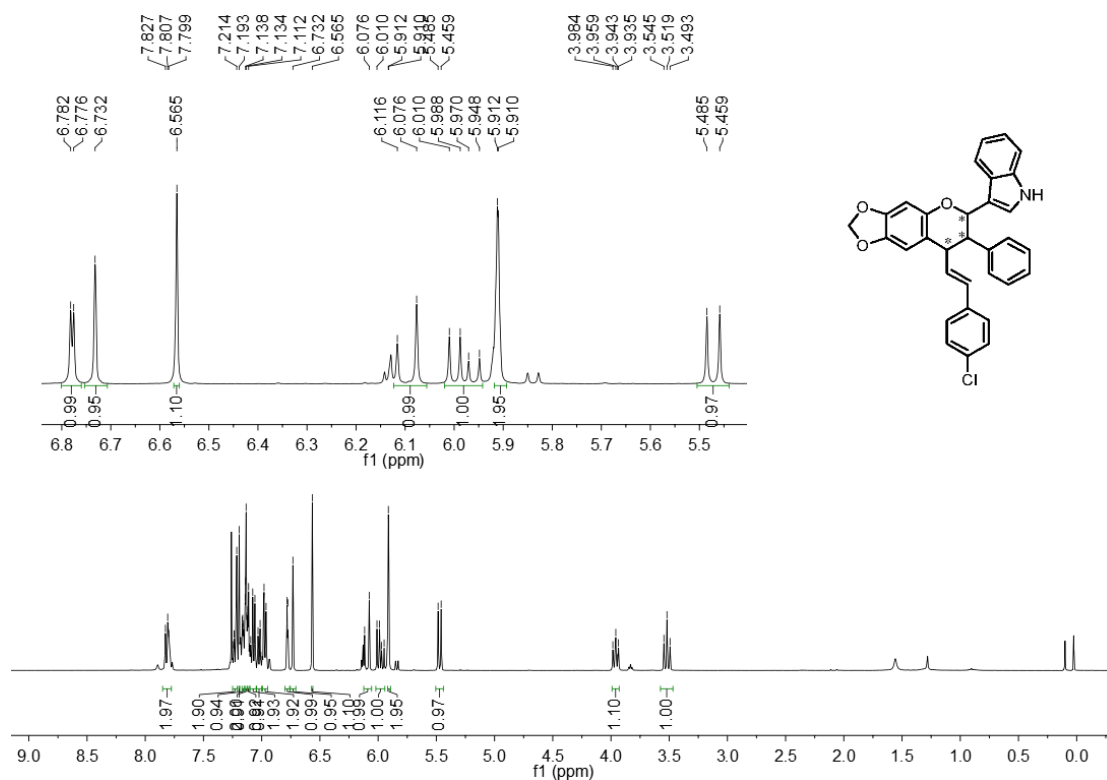

$^{13}\text{C}$  NMR (100 MHz,  $\text{CDCl}_3$ ) of compound **3ag**: (inseparable diastereomers, 84:16 dr)

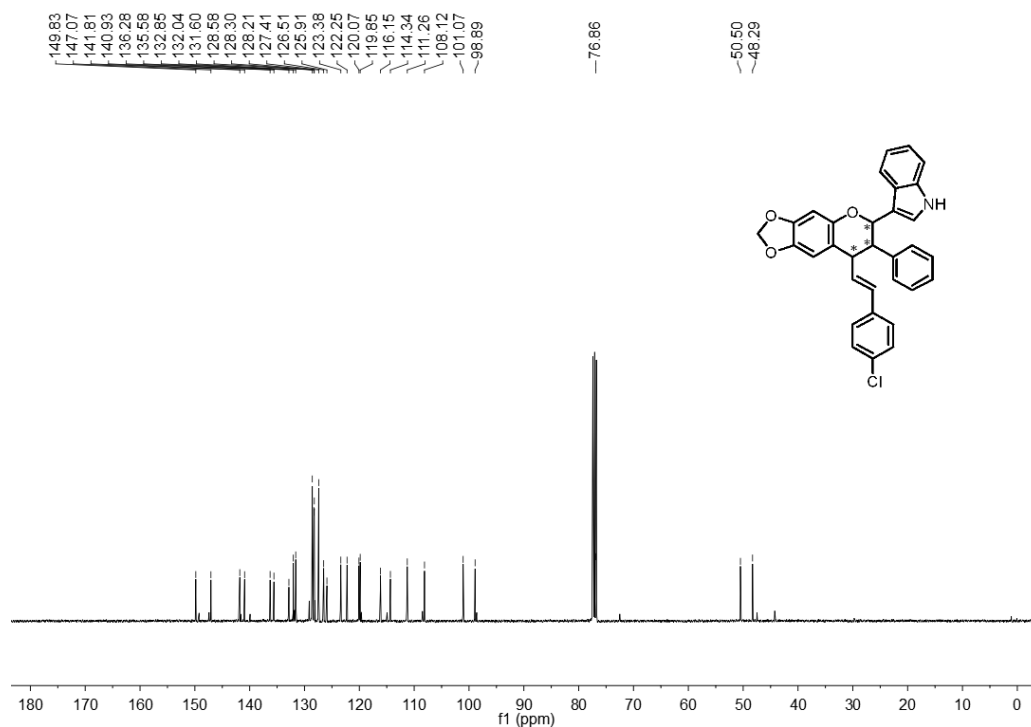

$^1\text{H}$  NMR (400 MHz,  $\text{CDCl}_3$ ) of compound **3ah**: (inseparable diastereomers, 85:15 dr)

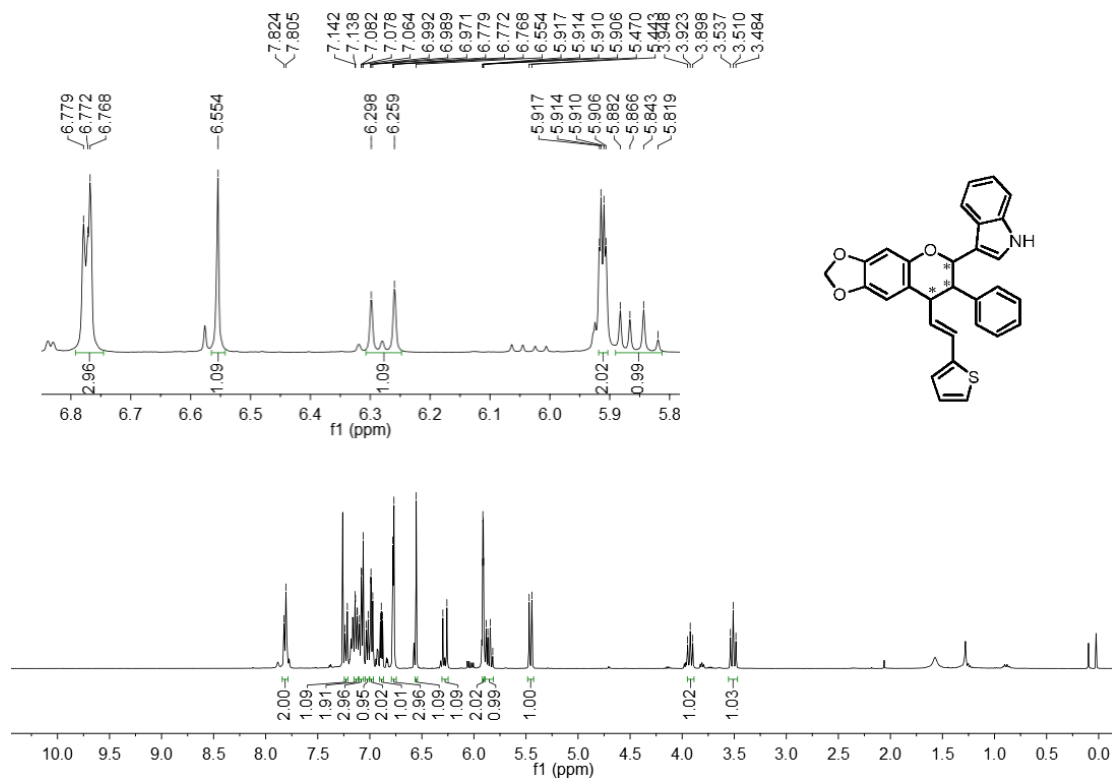

$^{13}\text{C}$  NMR (100 MHz,  $\text{CDCl}_3$ ) of compound **3ah**: (inseparable diastereomers, 85:15 dr)

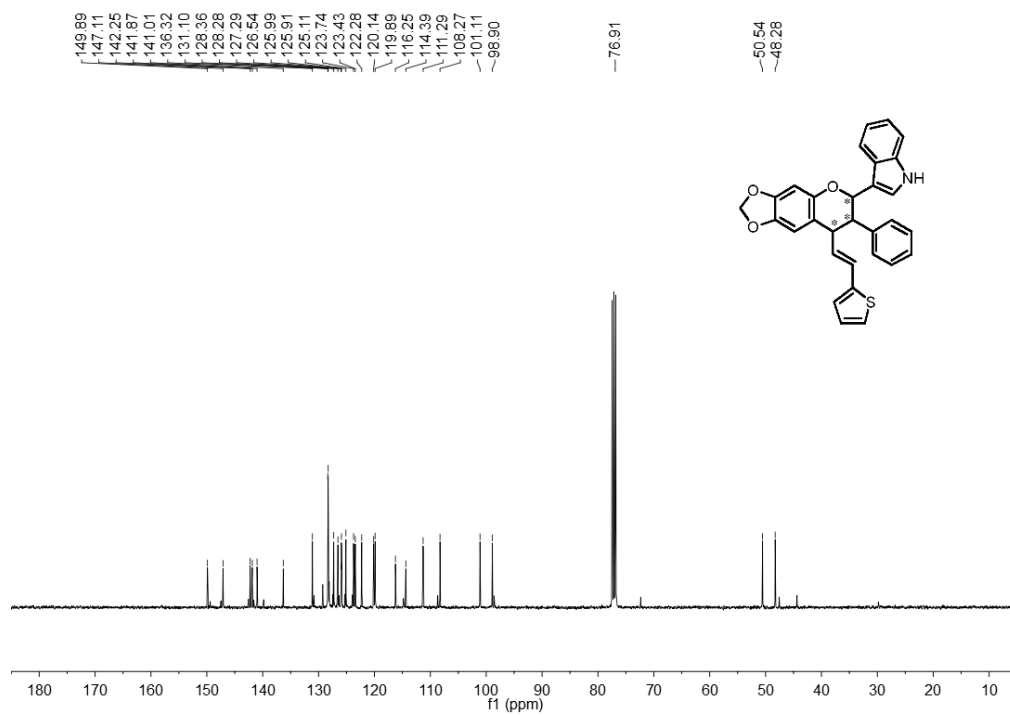

## 2. NMR spectra of substrates 6

$^1\text{H}$  NMR (400 MHz,  $\text{CDCl}_3$ ) of compound **6aa**:

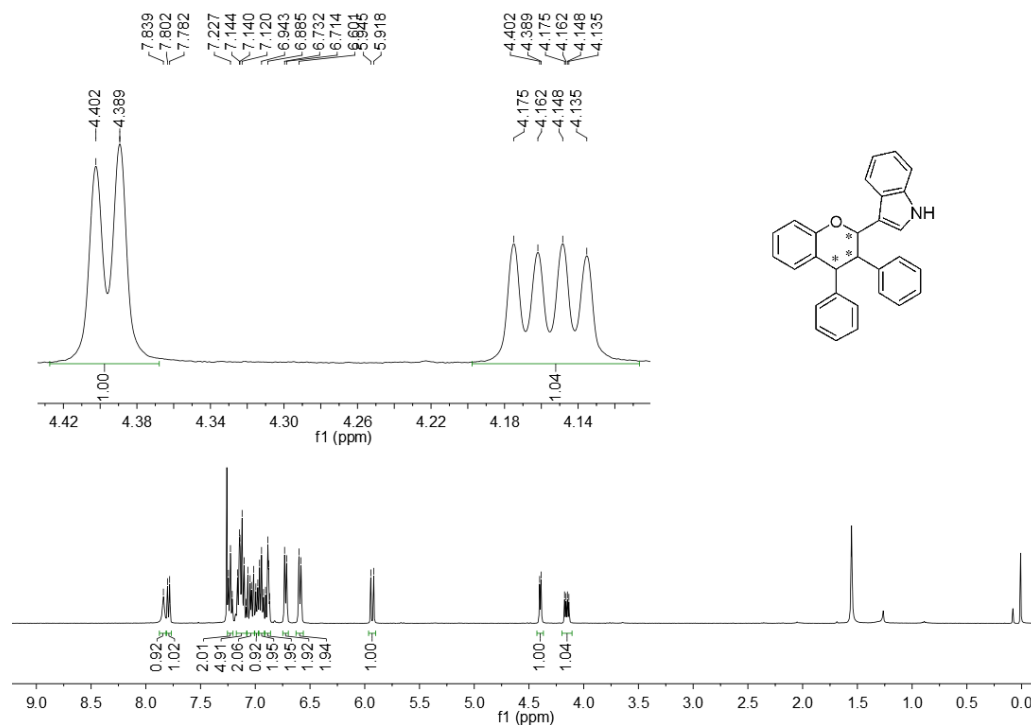

$^{13}\text{C}$  NMR (100 MHz,  $\text{CDCl}_3$ ) of compound **6aa**:

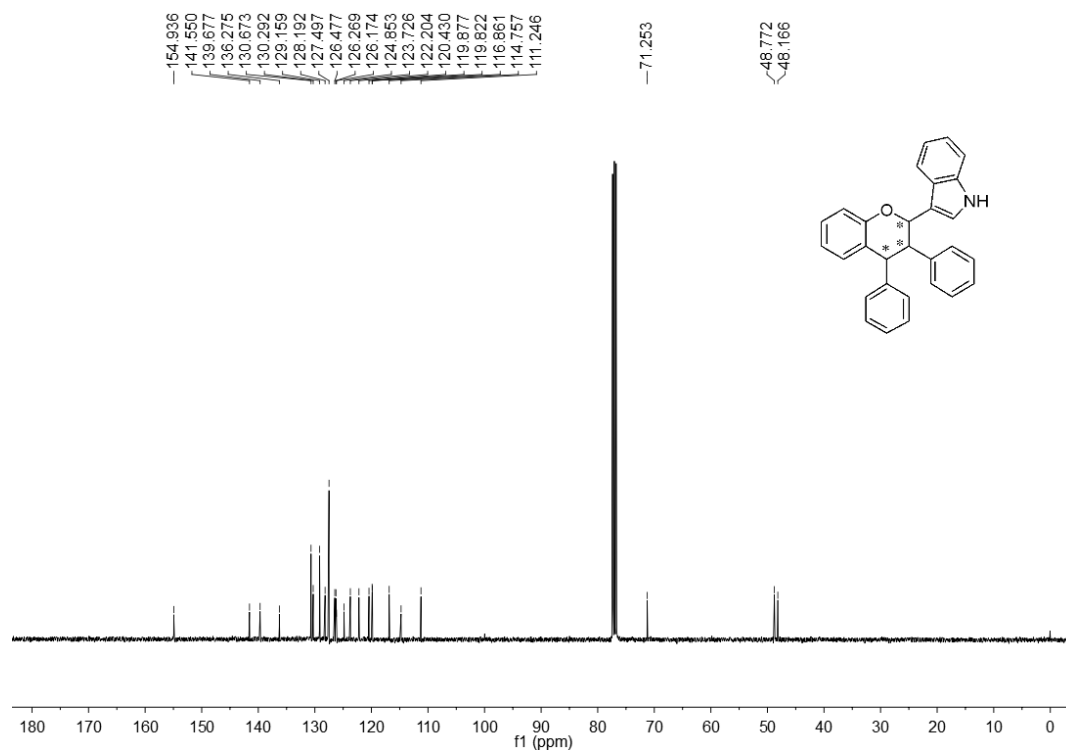

$^1\text{H}$  NMR (400 MHz,  $\text{CDCl}_3$ ) of compound **6ba**:

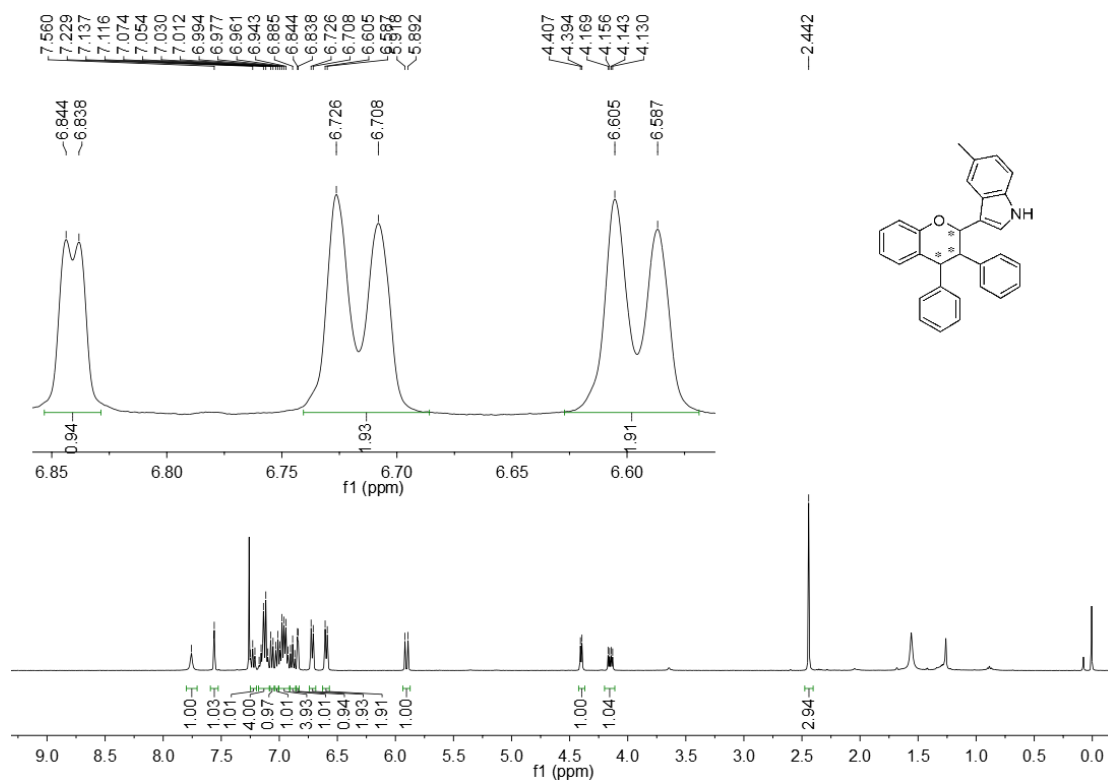

$^{13}\text{C}$  NMR (100 MHz,  $\text{CDCl}_3$ ) of compound **6ba**:

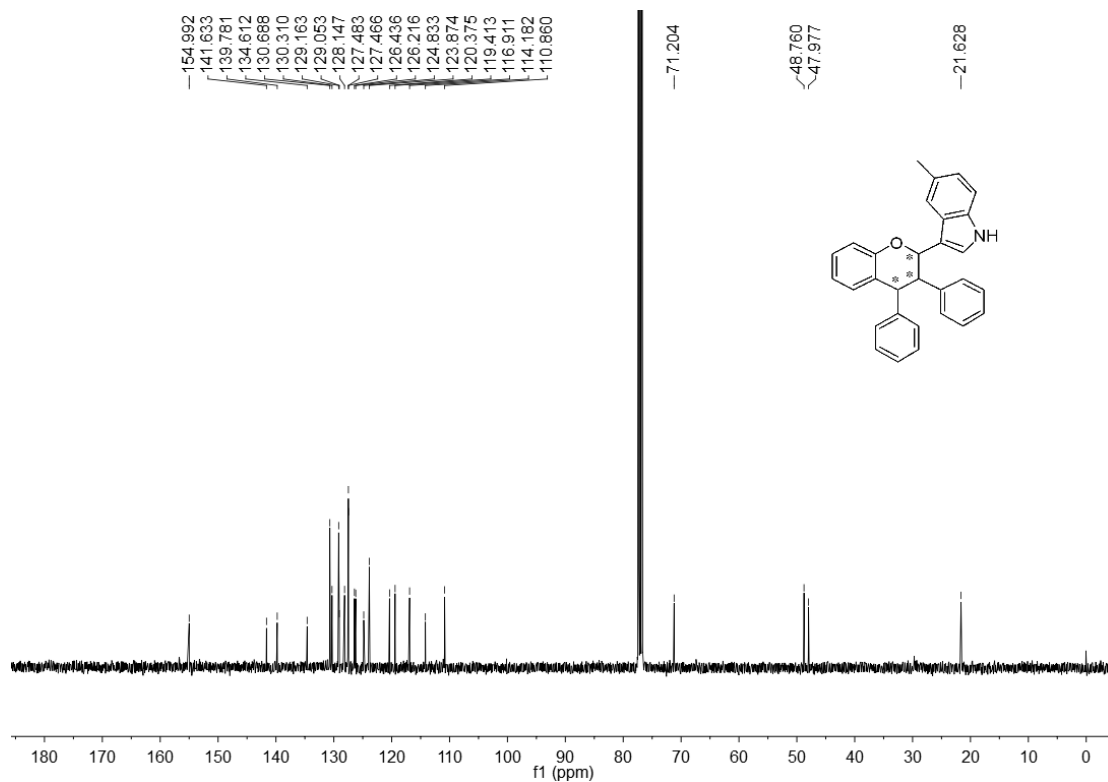

$^1\text{H}$  NMR (400 MHz,  $\text{CDCl}_3$ ) of compound **6pa**:

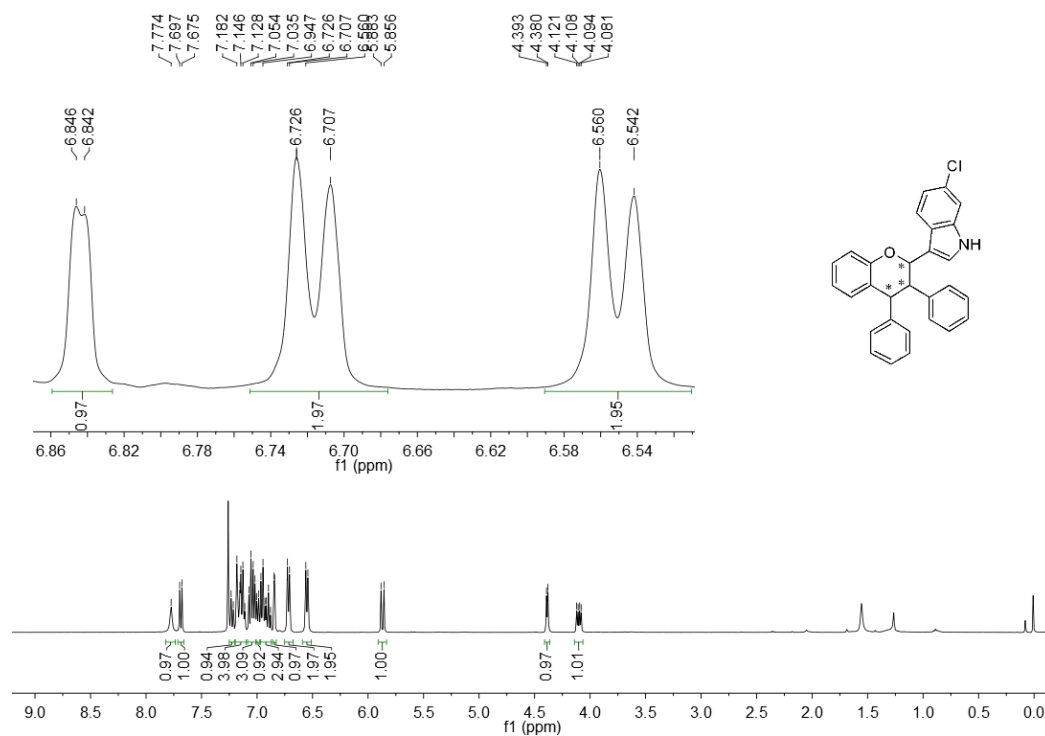

$^{13}\text{C}$  NMR (100 MHz,  $\text{CDCl}_3$ ) of compound **6pa**:

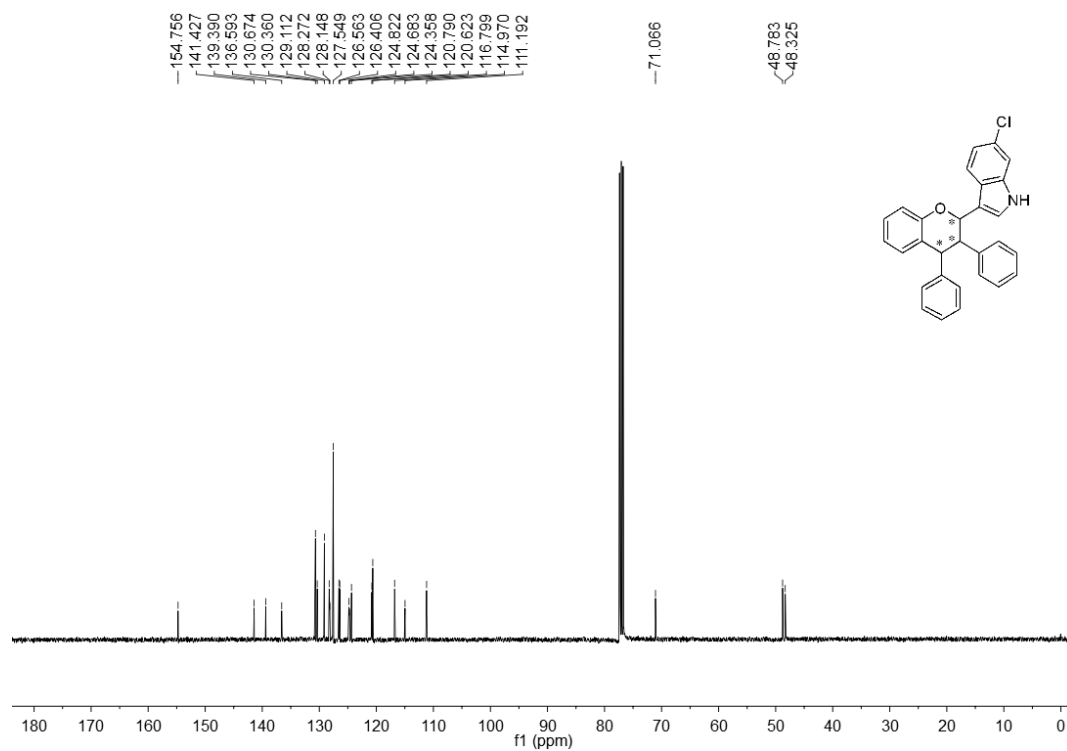

$^1\text{H}$  NMR (400 MHz,  $\text{CDCl}_3$ ) of compound **6da**:

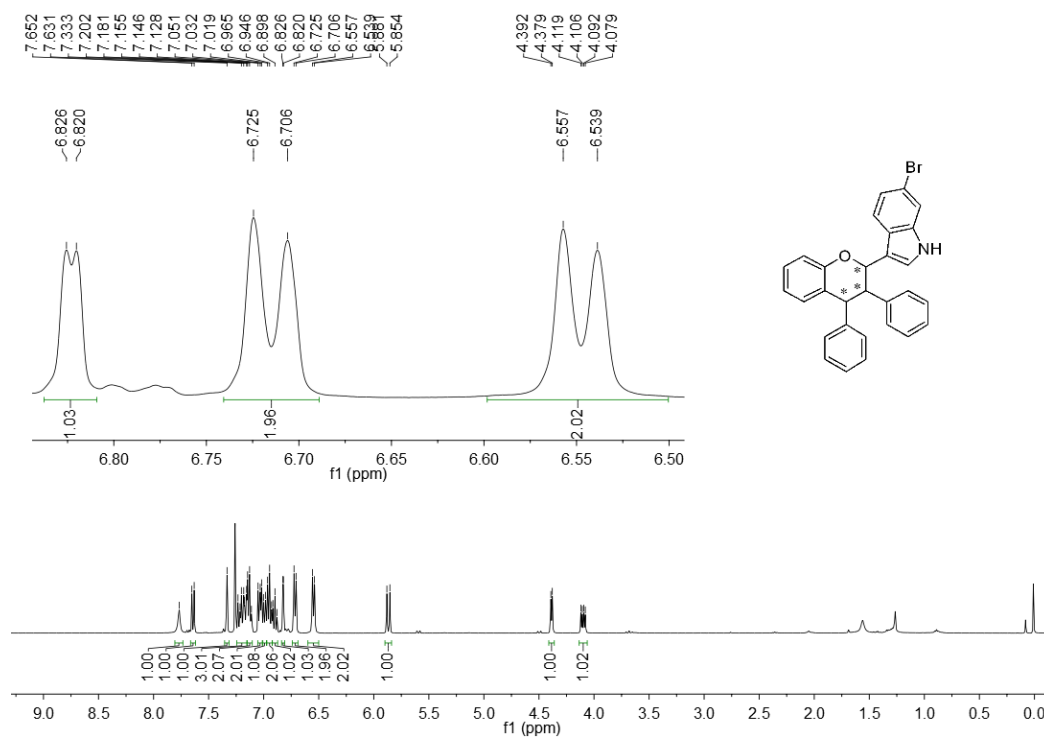

$^{13}\text{C}$  NMR (100 MHz,  $\text{CDCl}_3$ ) of compound **6da**:

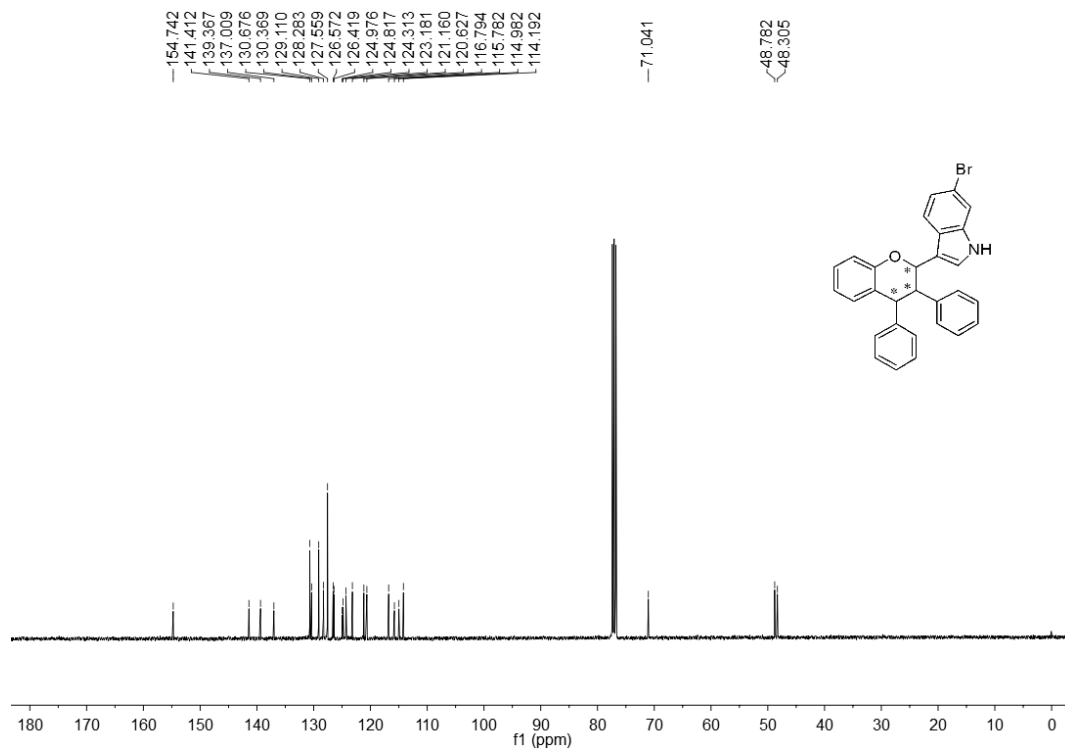

$^1\text{H}$  NMR (400 MHz,  $\text{CDCl}_3$ ) of compound **6ea**:

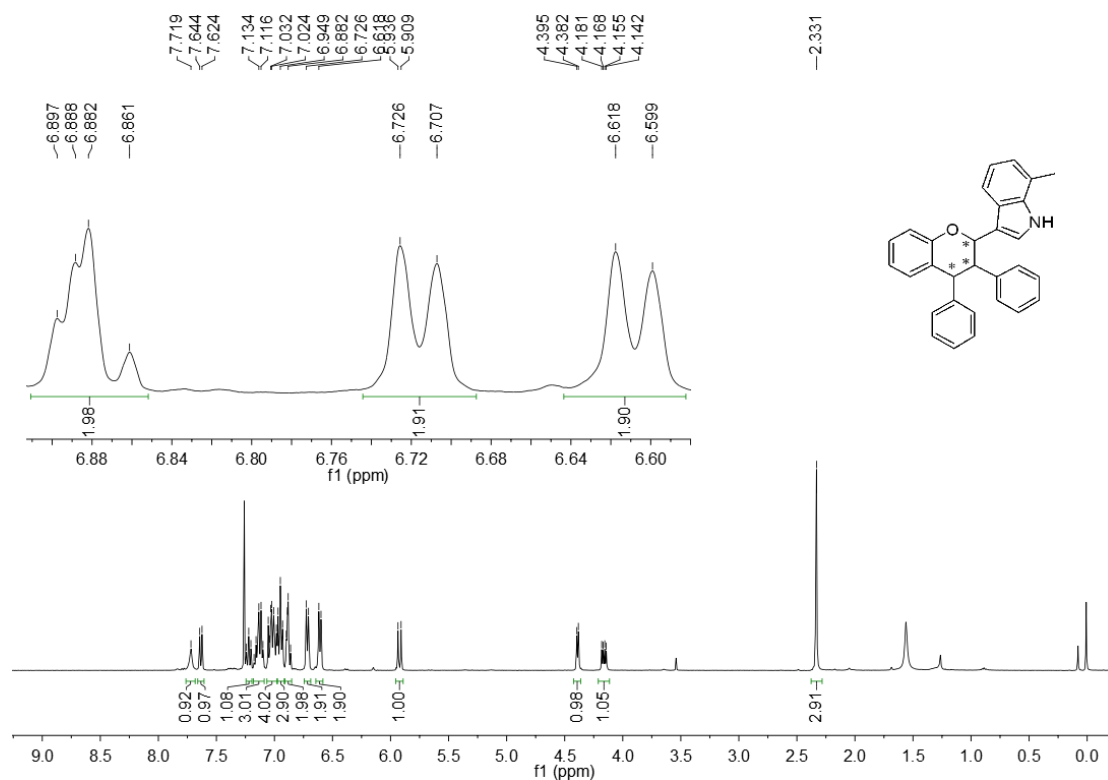

$^{13}\text{C}$  NMR (100 MHz,  $\text{CDCl}_3$ ) of compound **6ea**:

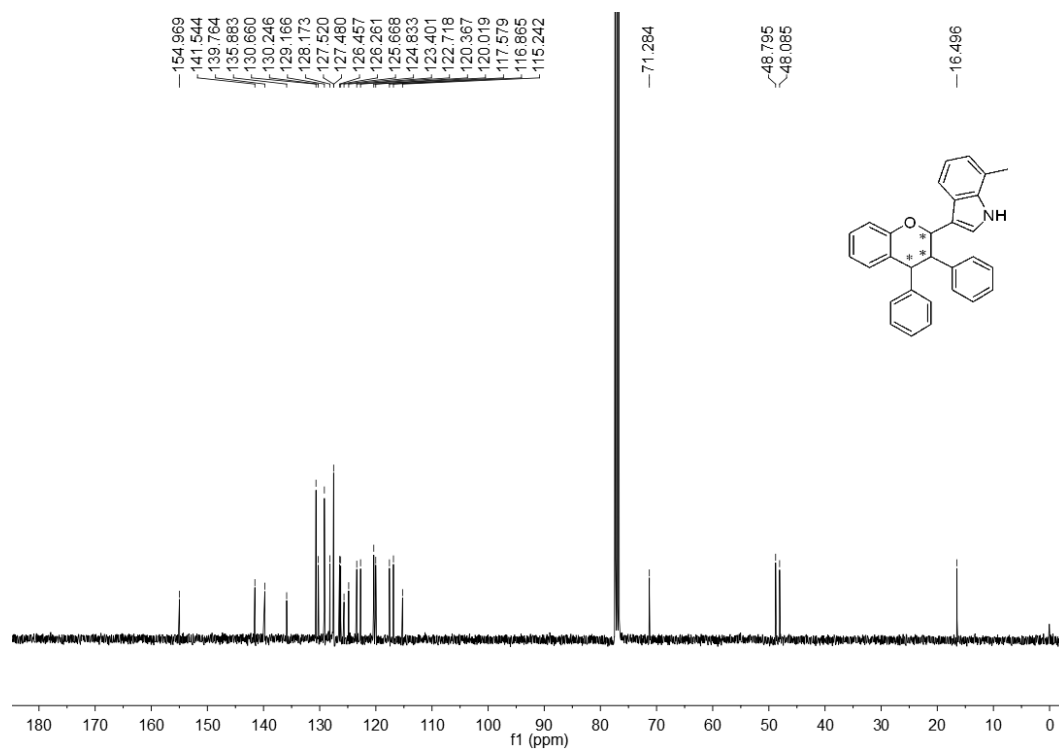



$^1\text{H}$  NMR (400 MHz,  $\text{CDCl}_3$ ) of compound **6qa**:

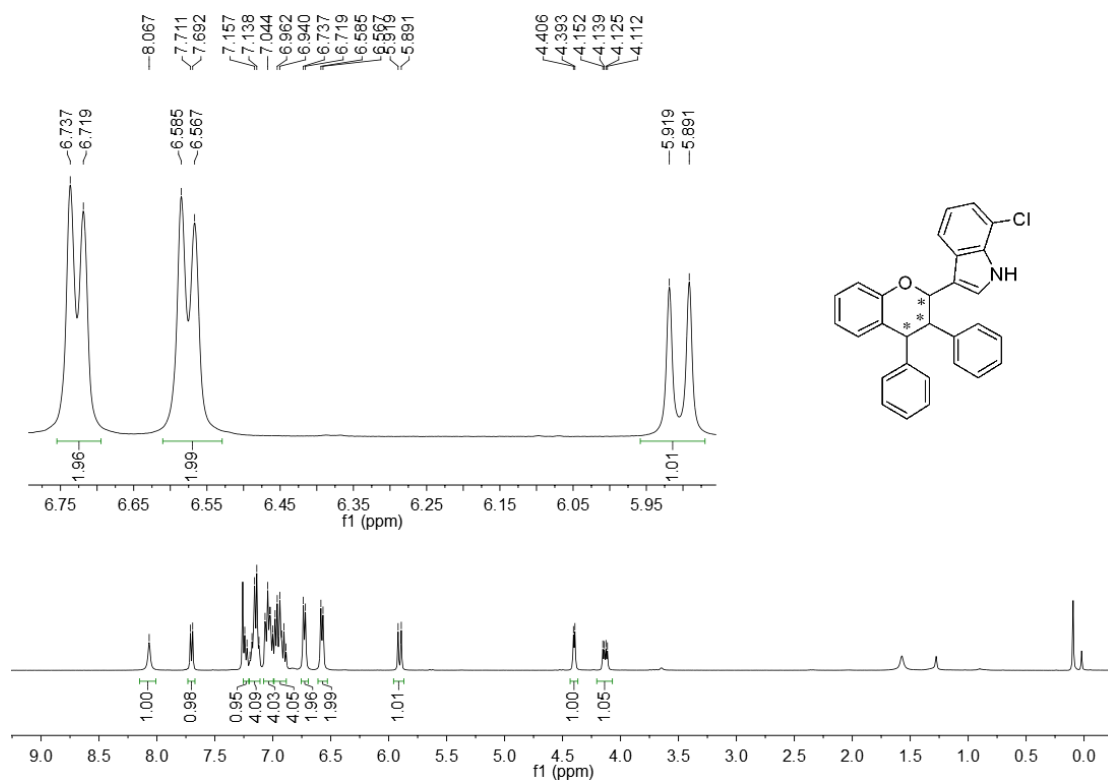

$^{13}\text{C}$  NMR (100 MHz,  $\text{CDCl}_3$ ) of compound **6qa**:

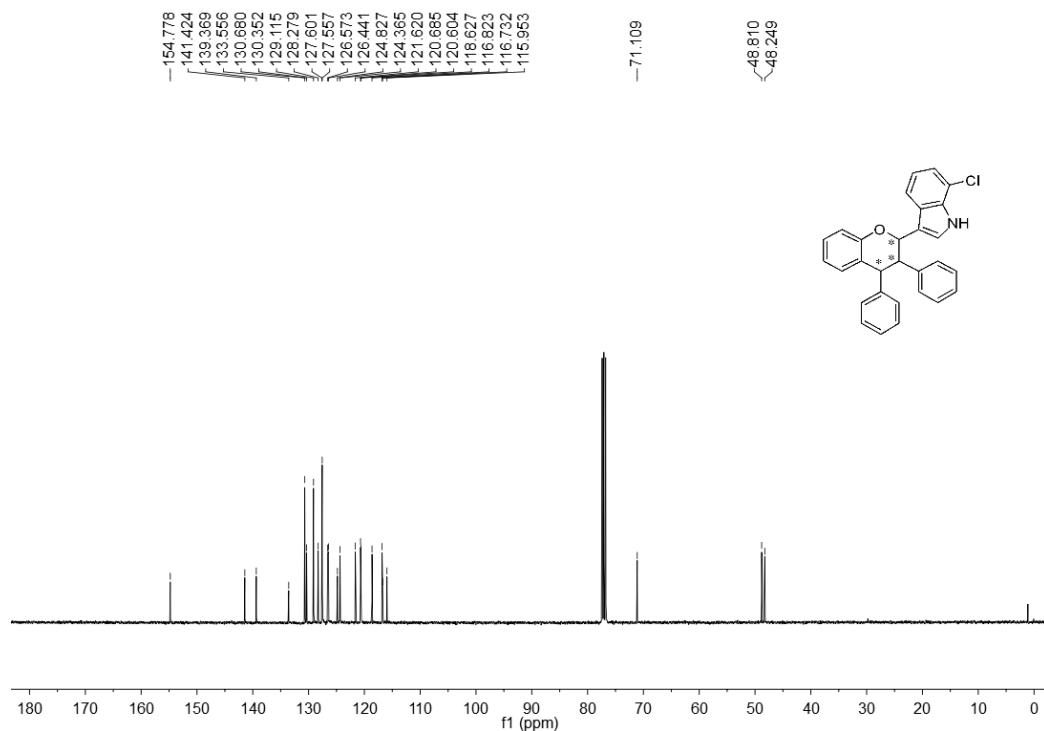

$^1\text{H}$  NMR (400 MHz,  $\text{CDCl}_3$ ) of compound **6ra**:

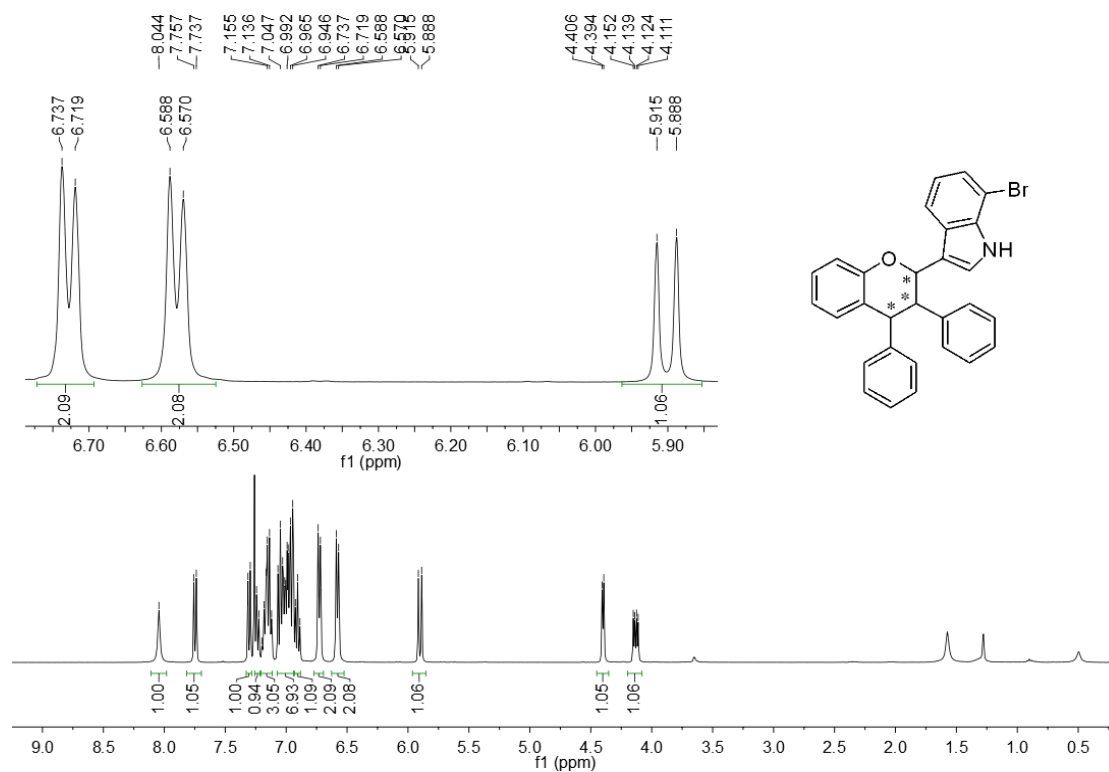

$^{13}\text{C}$  NMR (100 MHz,  $\text{CDCl}_3$ ) of compound **6ra**:

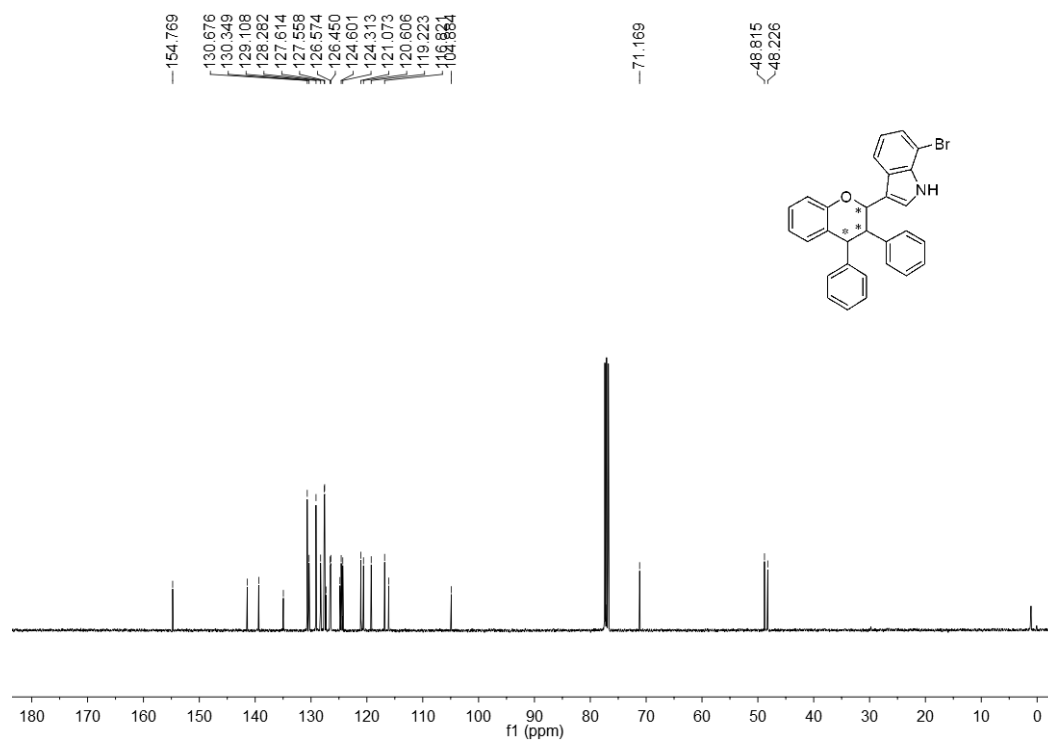

$^1\text{H}$  NMR (400 MHz,  $\text{CDCl}_3$ ) of compound **6ka**:

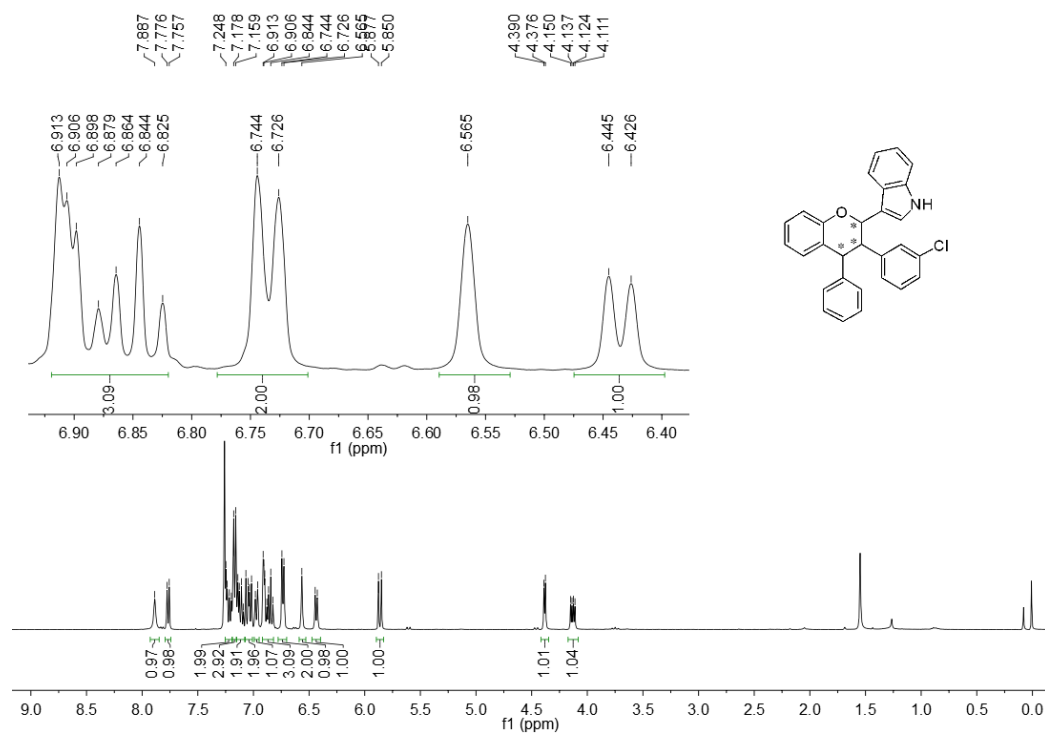

$^{13}\text{C}$  NMR (100 MHz,  $\text{CDCl}_3$ ) of compound **6ka**:

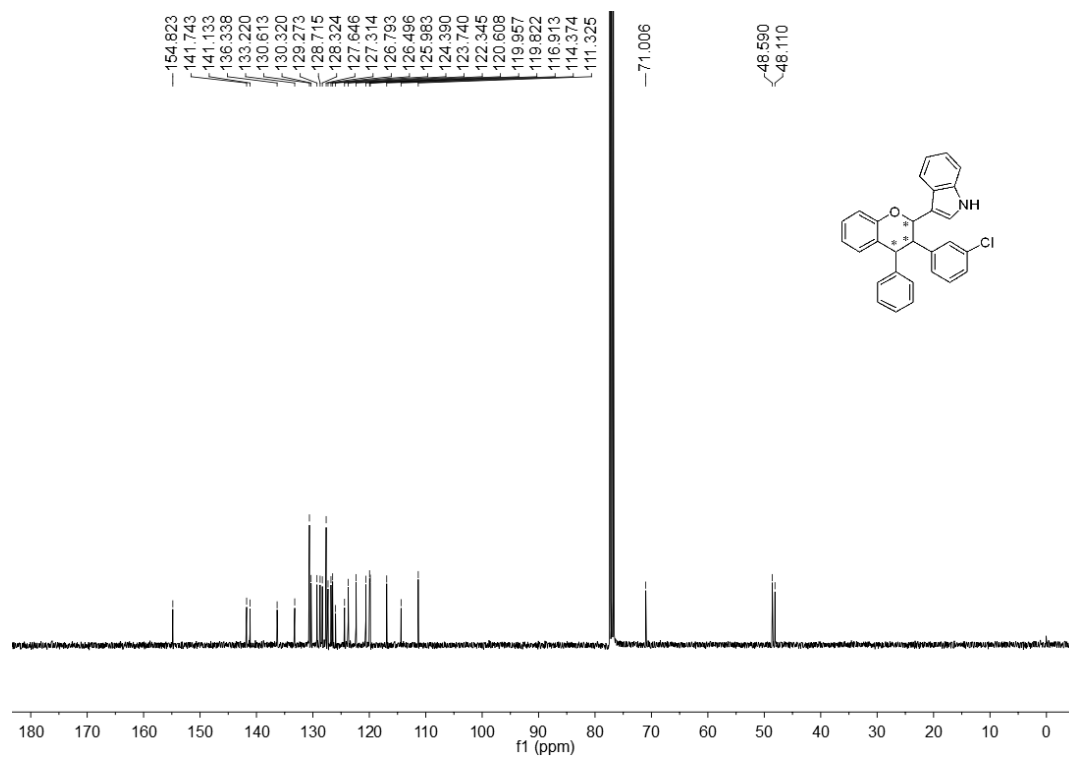

Chemical structure of compound 10 is shown as an inset. The structure is a substituted benzodioxane derivative. It features a benzodioxane core with a phenyl group at position 2, a 4-chlorophenyl group at position 3, and a 1H-indol-3-yl group at position 4. The stereochemistry at positions 2 and 3 is indicated as (2R,3R).

Chemical structure of compound 10: c1ccc(cc1)c2ccccc2Oc3ccccc3C(c4ccccc4)c5ccc(Cl)cc5

<sup>13</sup>C NMR spectrum (CDCl<sub>3</sub>) of compound 10. The x-axis is labeled 'f1 (ppm)' and ranges from 180 to 0. The spectrum shows several peaks in the aromatic region (110-155 ppm) and two peaks in the aliphatic region (47.7 and 48.6 ppm).

Peak list (ppm): 154.841, 141.241, 138.192, 136.333, 132.035, 130.682, 130.411, 130.323, 128.300, 127.690, 126.697, 125.963, 124.509, 123.744, 122.344, 120.582, 119.932, 119.789, 116.909, 114.419, 111.347, 71.154, 48.583, 47.725.

$^1\text{H}$  NMR (400 MHz,  $\text{CDCl}_3$ ) of compound **6ab**:

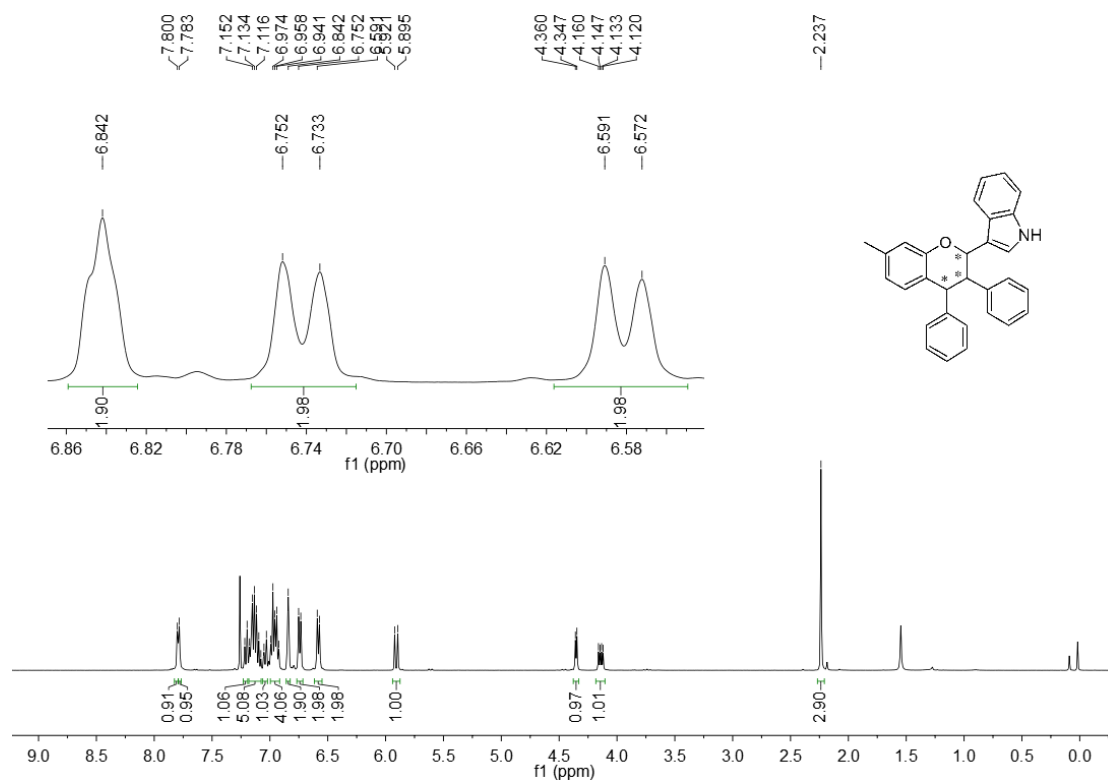

$^{13}\text{C}$  NMR (100 MHz,  $\text{CDCl}_3$ ) of compound **6ab**:

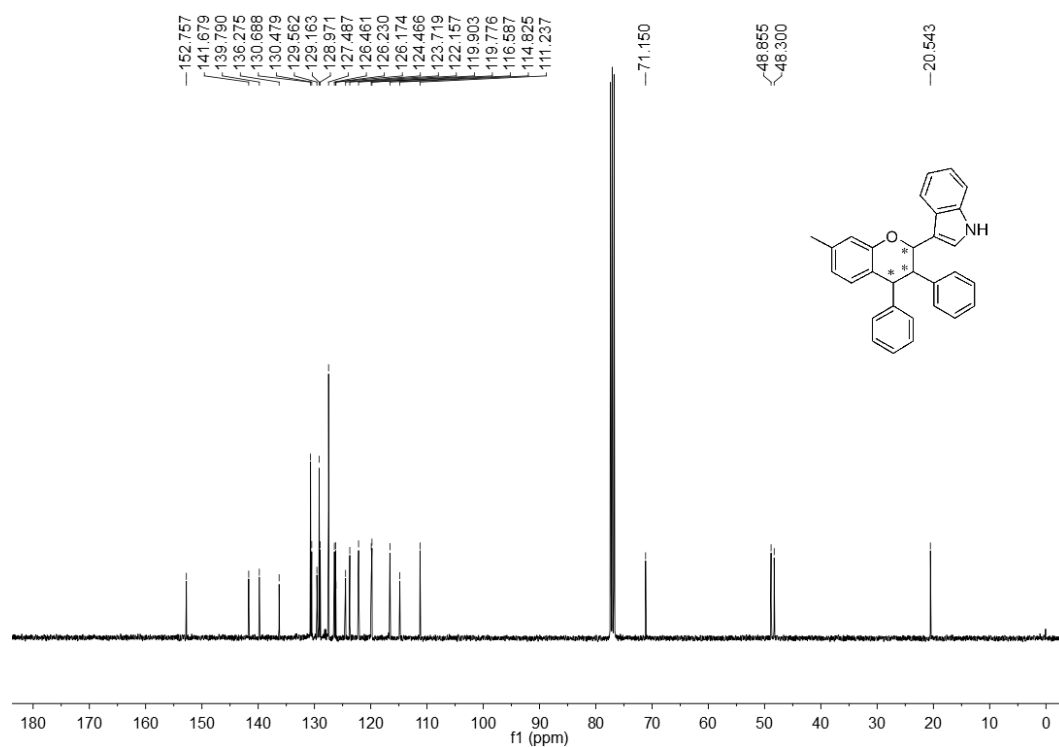

$^1\text{H}$  NMR (400 MHz,  $\text{CDCl}_3$ ) of compound **6ac** (major diastereoisomer):

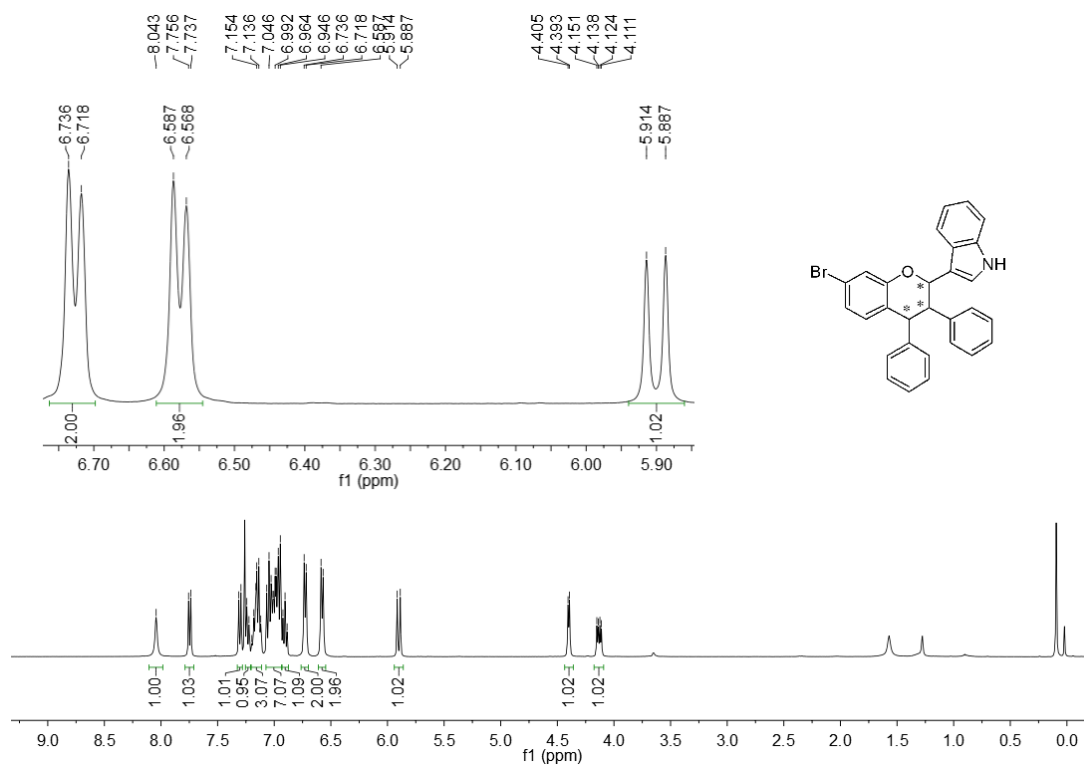

$^{13}\text{C}$  NMR (100 MHz,  $\text{CDCl}_3$ ) of compound **6ac** (major diastereoisomer):

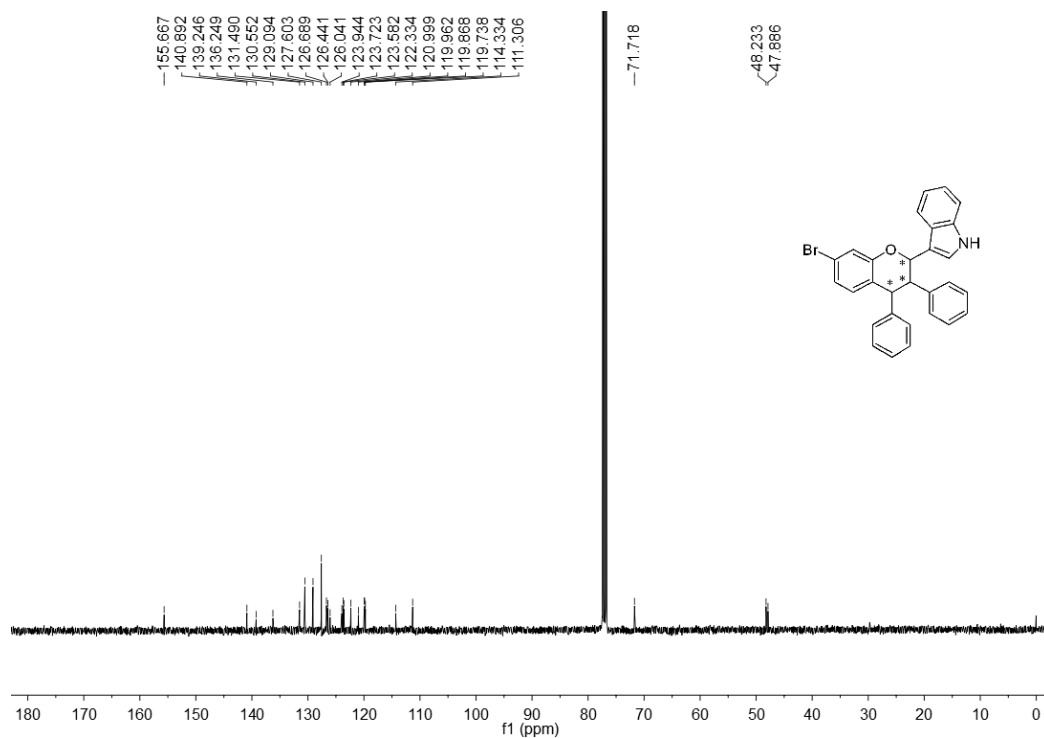

$^1\text{H}$  NMR (400 MHz,  $\text{CDCl}_3$ ) of compound **6ac** (minor diastereoisomer):

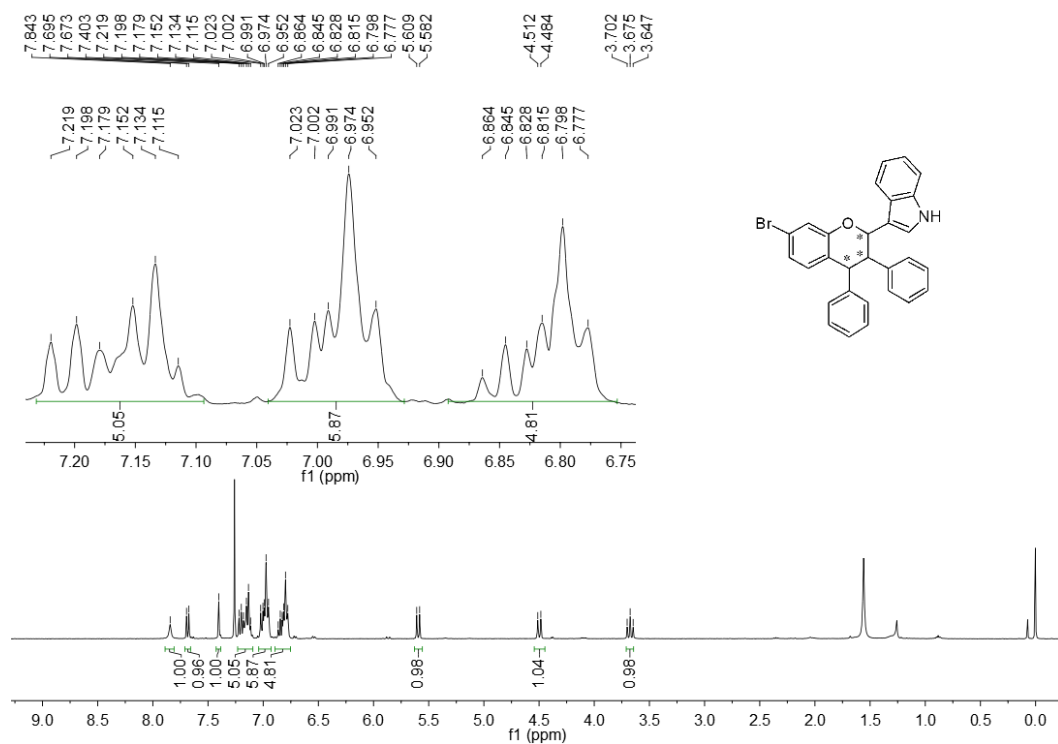

$^{13}\text{C}$  NMR (100 MHz,  $\text{CDCl}_3$ ) of compound **6ac** (minor diastereoisomer):

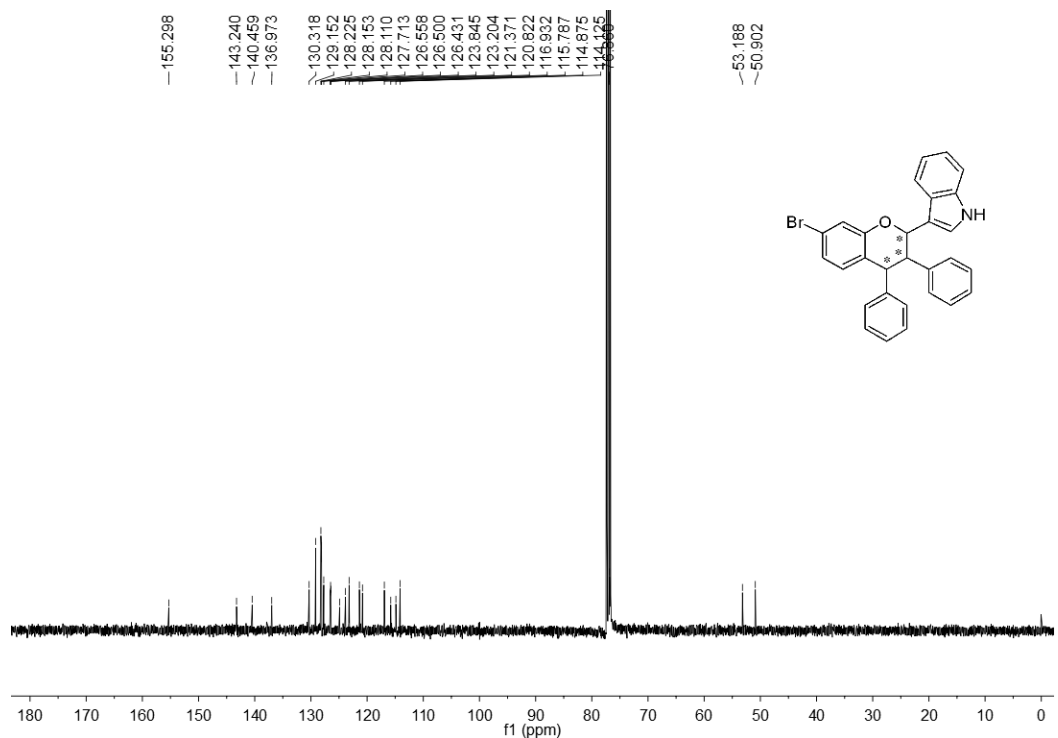

$^1\text{H}$  NMR (400 MHz,  $\text{CDCl}_3$ ) of compound **6ad**:

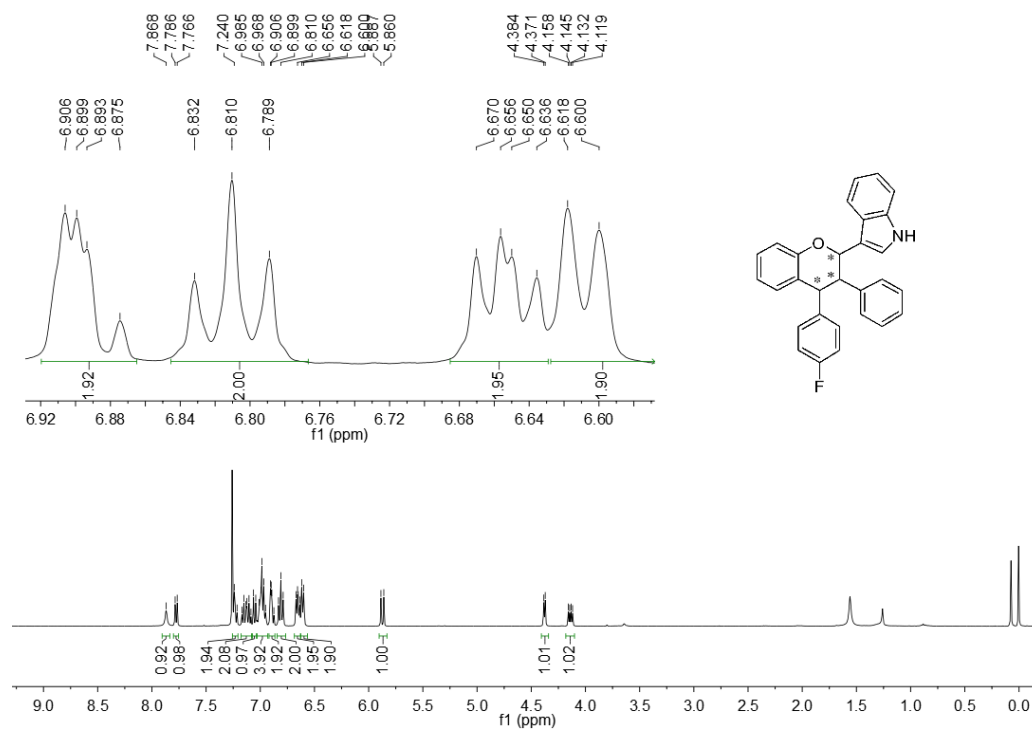

$^{13}\text{C}$  NMR (100 MHz,  $\text{CDCl}_3$ ) of compound **6ad**:

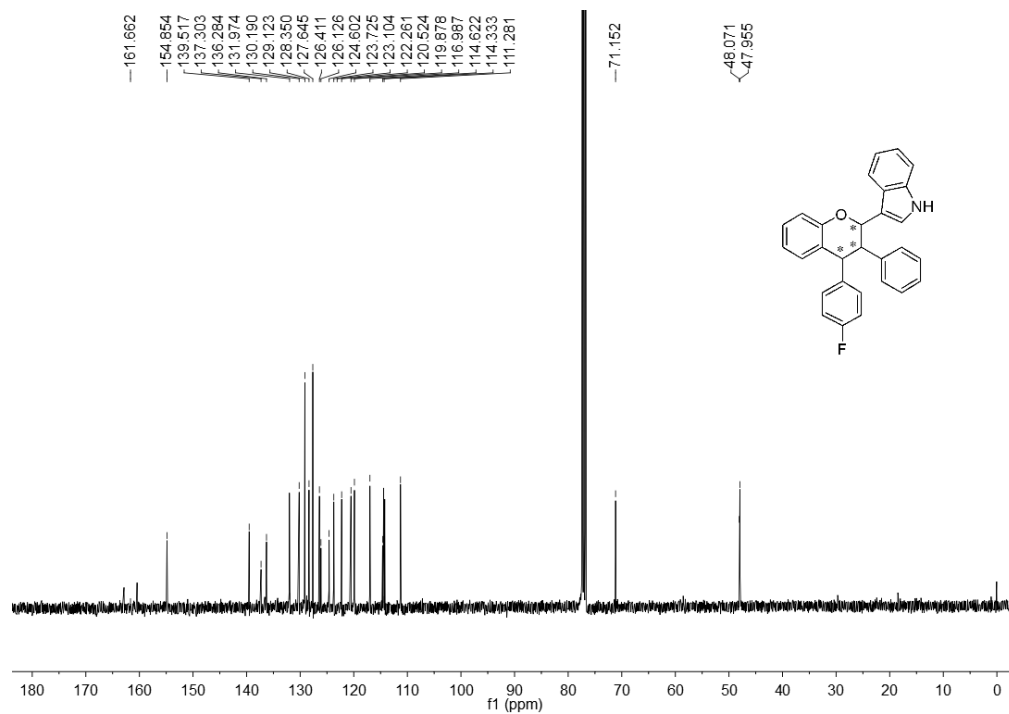



$^{19}\text{F}$  NMR (376 MHz,  $\text{CDCl}_3$ ) of compound **6ad**:

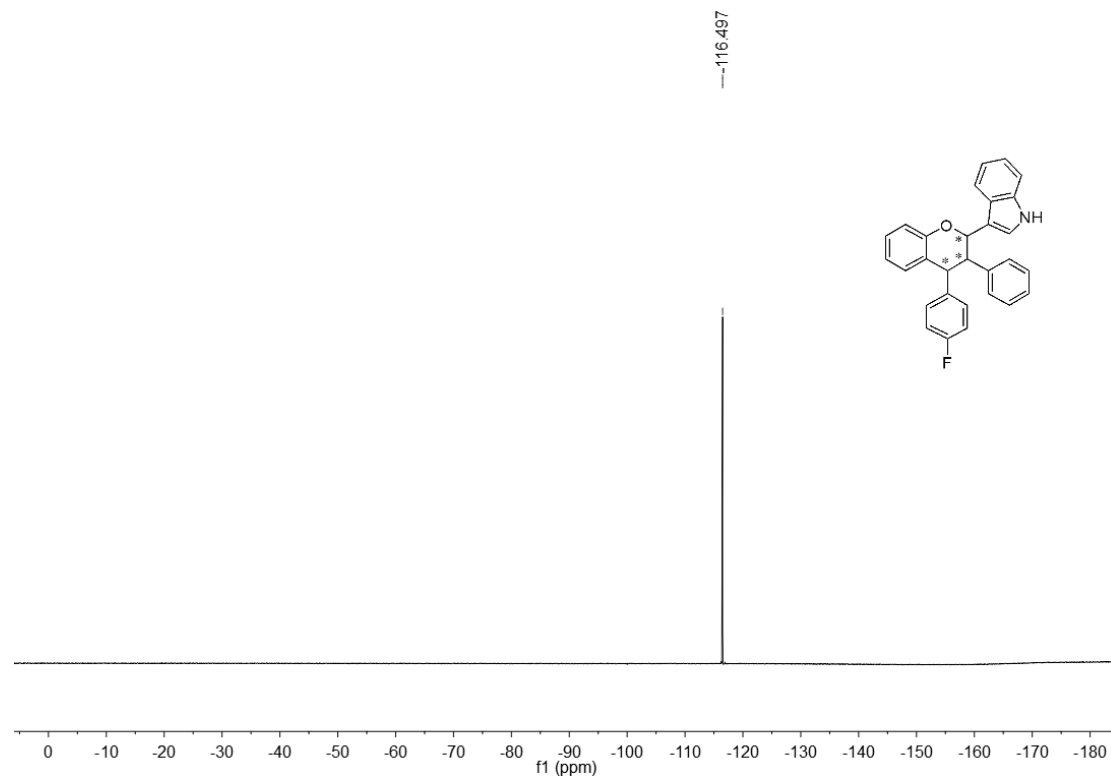

$^1\text{H}$  NMR (400 MHz,  $\text{CDCl}_3$ ) of compound **6ae**:

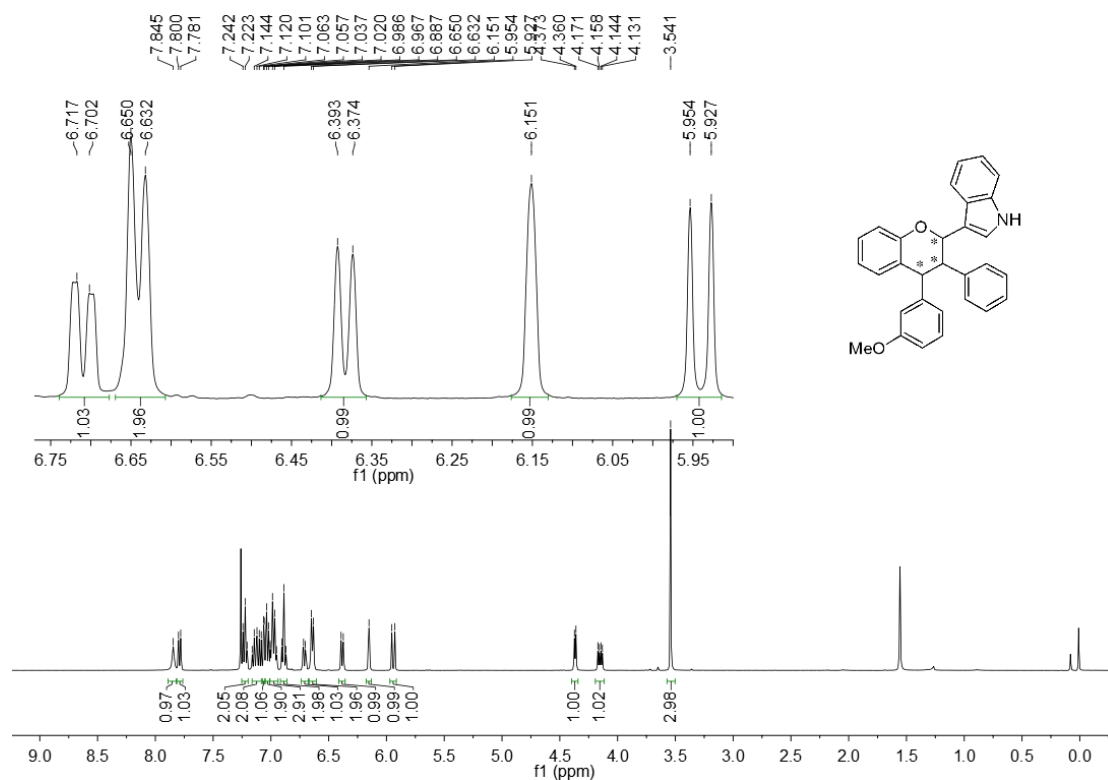

$^{13}\text{C}$  NMR (100 MHz,  $\text{CDCl}_3$ ) of compound **6ae**:

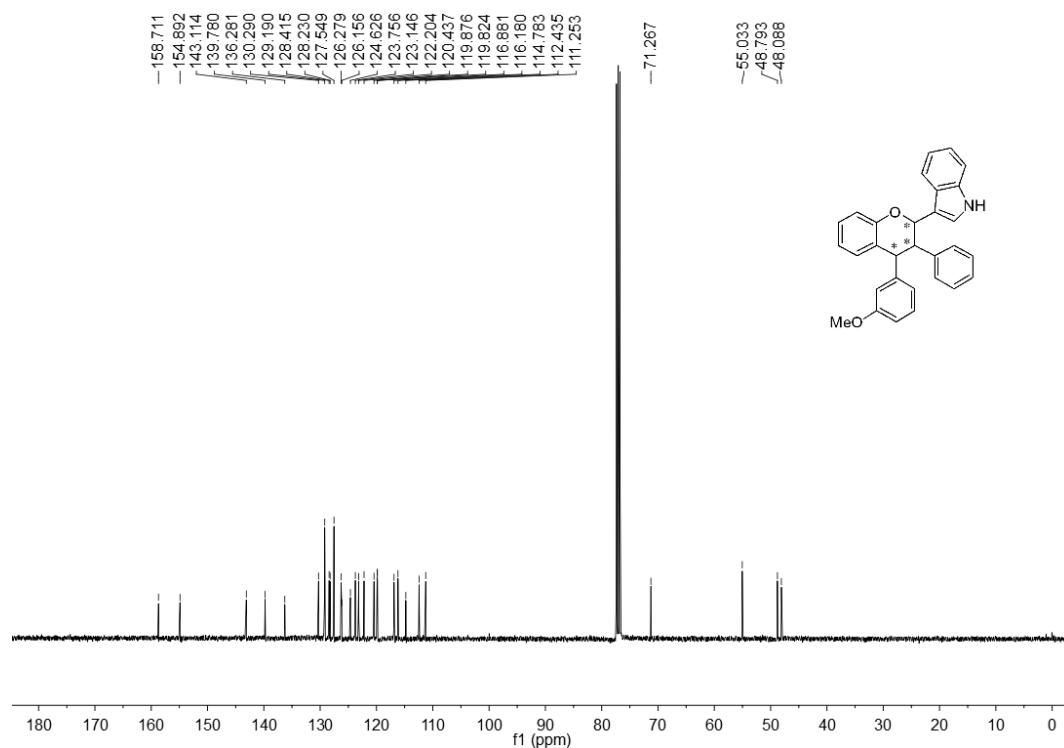

$^1\text{H}$  NMR (400 MHz,  $\text{CDCl}_3$ ) of compound **6af**:

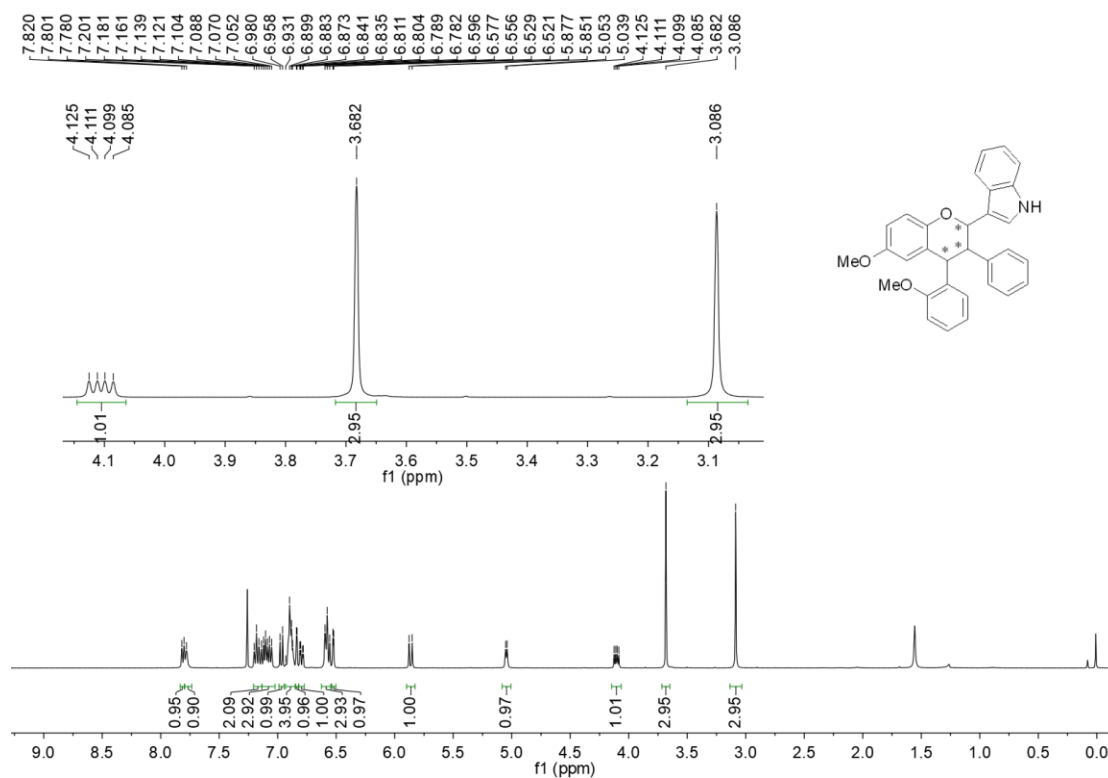

$^{13}\text{C}$  NMR (100 MHz,  $\text{CDCl}_3$ ) of compound **6af**:

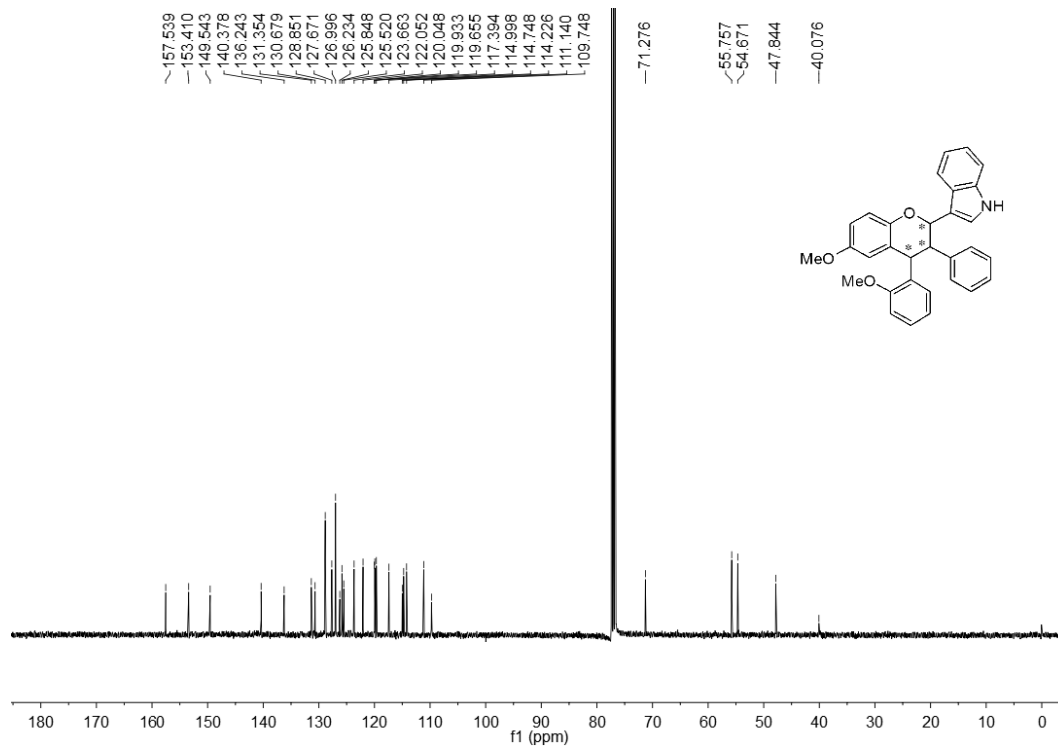

### 3. HPLC spectra of products 3

**3aa:** (inseparable diastereomers, 89:11 dr):

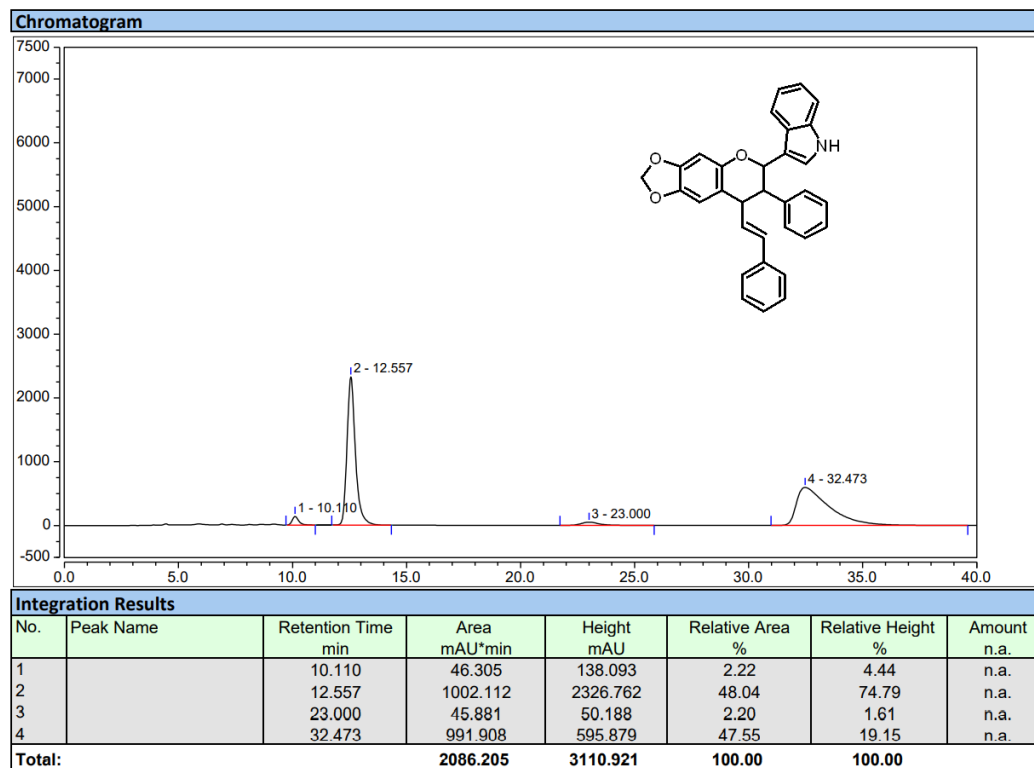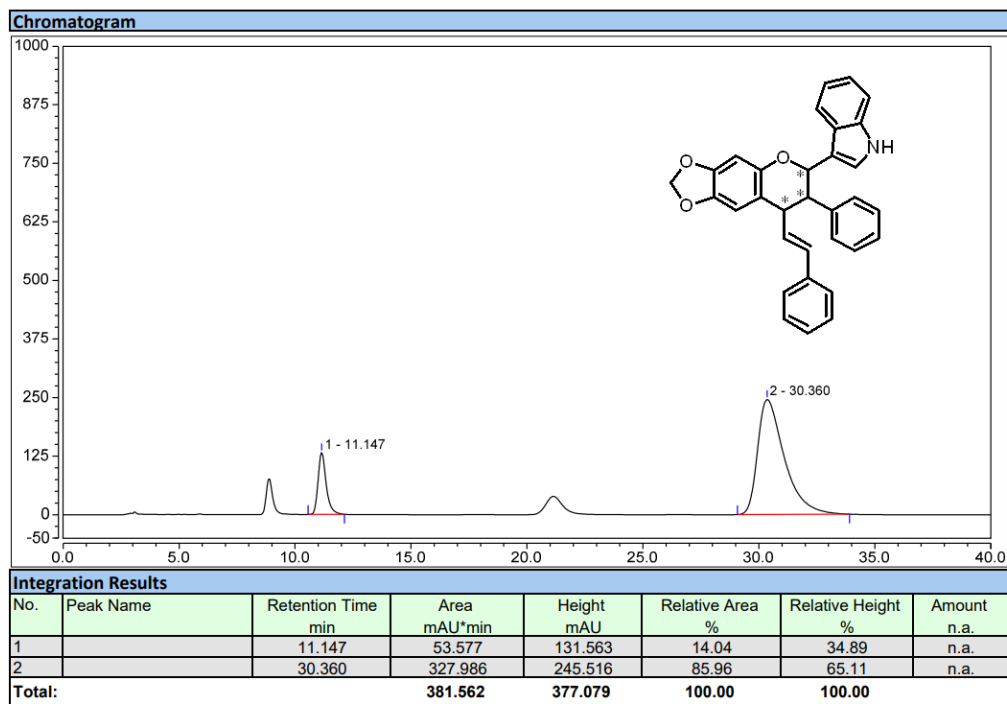

**3ba:** (inseparable diastereomers, 83:17 dr):

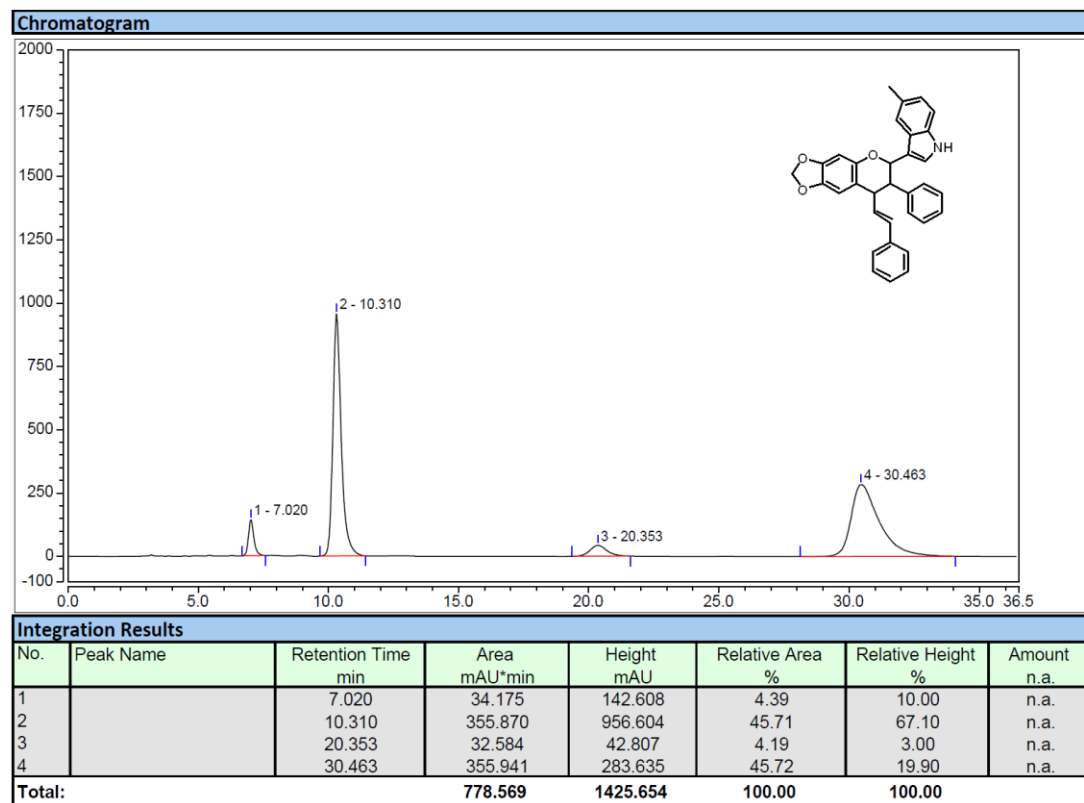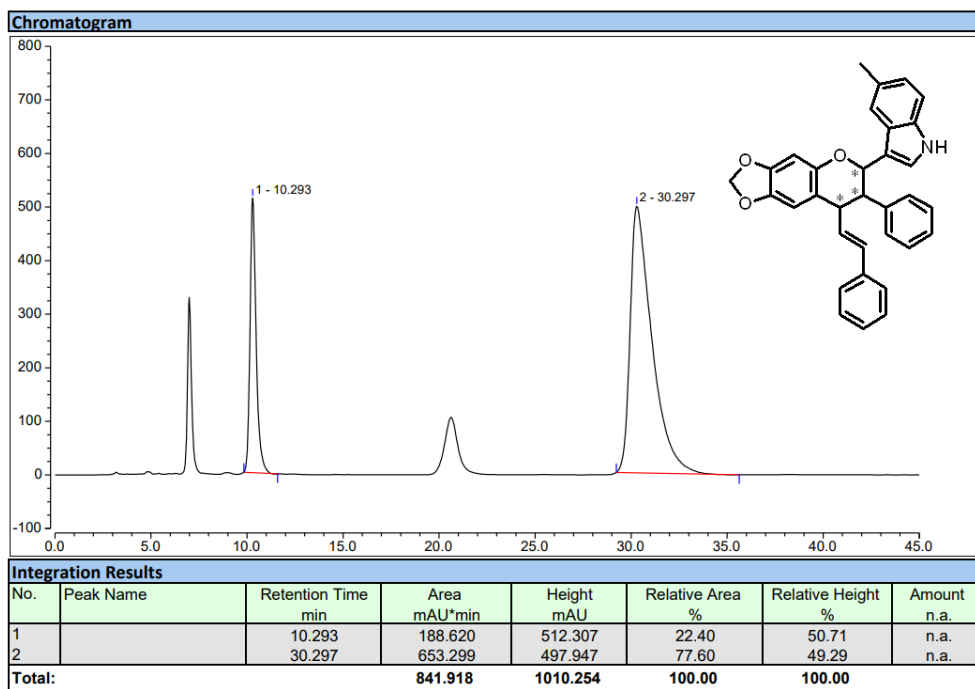

**3ca:** (inseparable diastereomers, 86:14 dr):

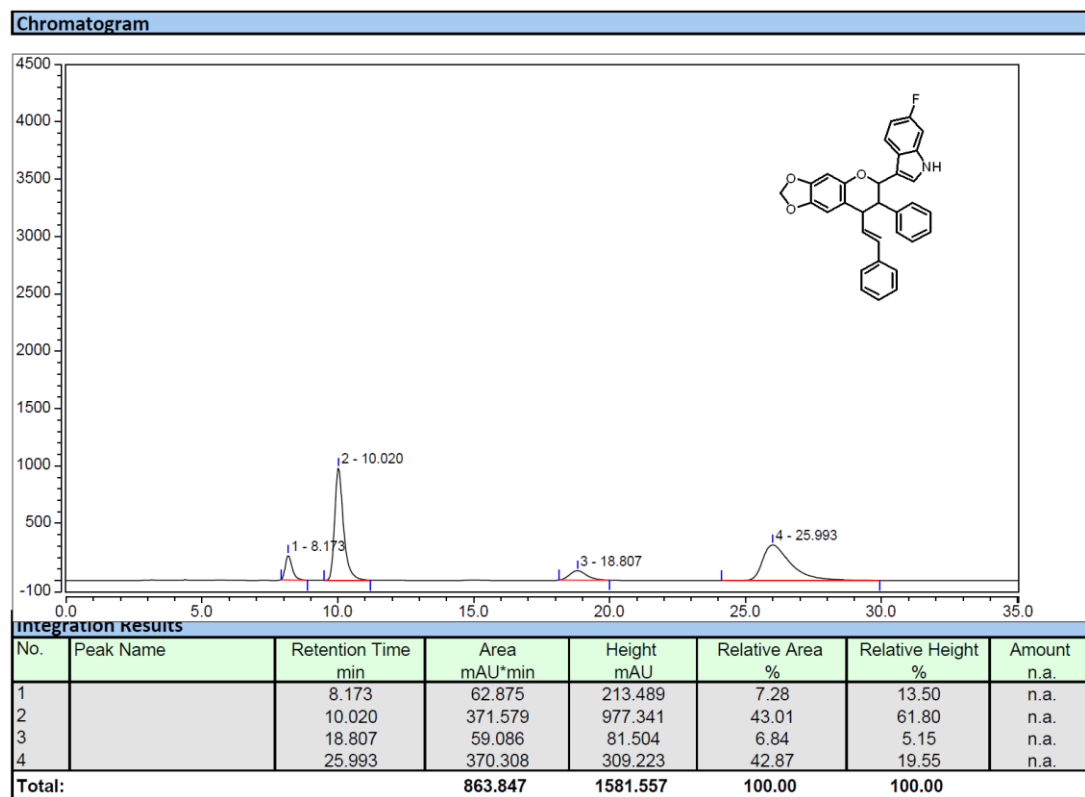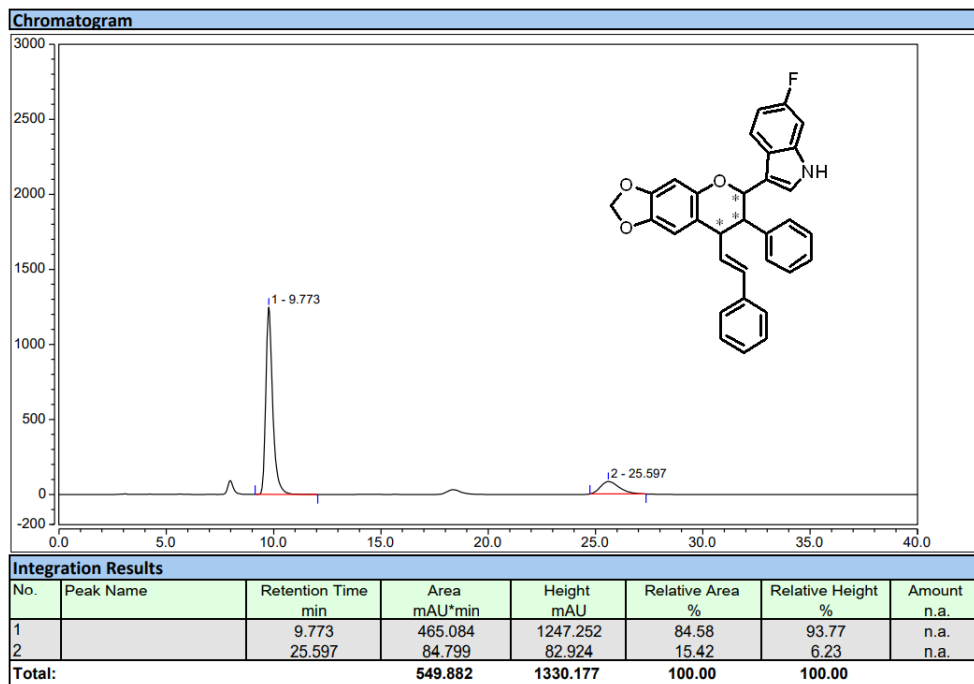

**3da:** (inseparable diastereomers, 91:9 dr):

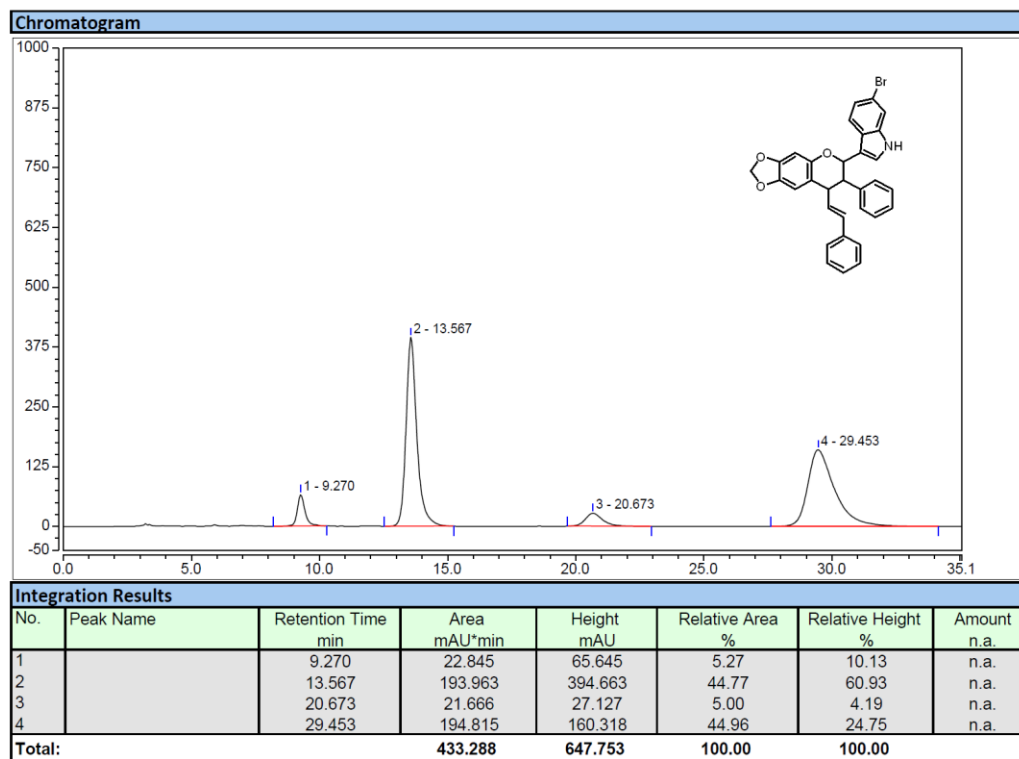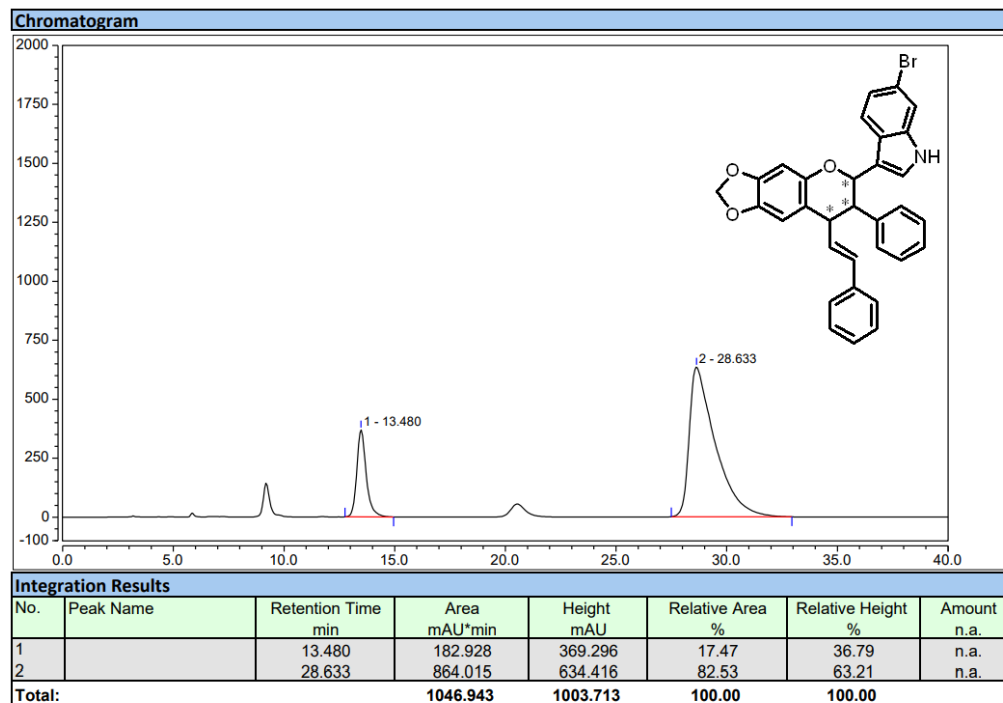

**3ea:** (inseparable diastereomers, 85:15 dr):

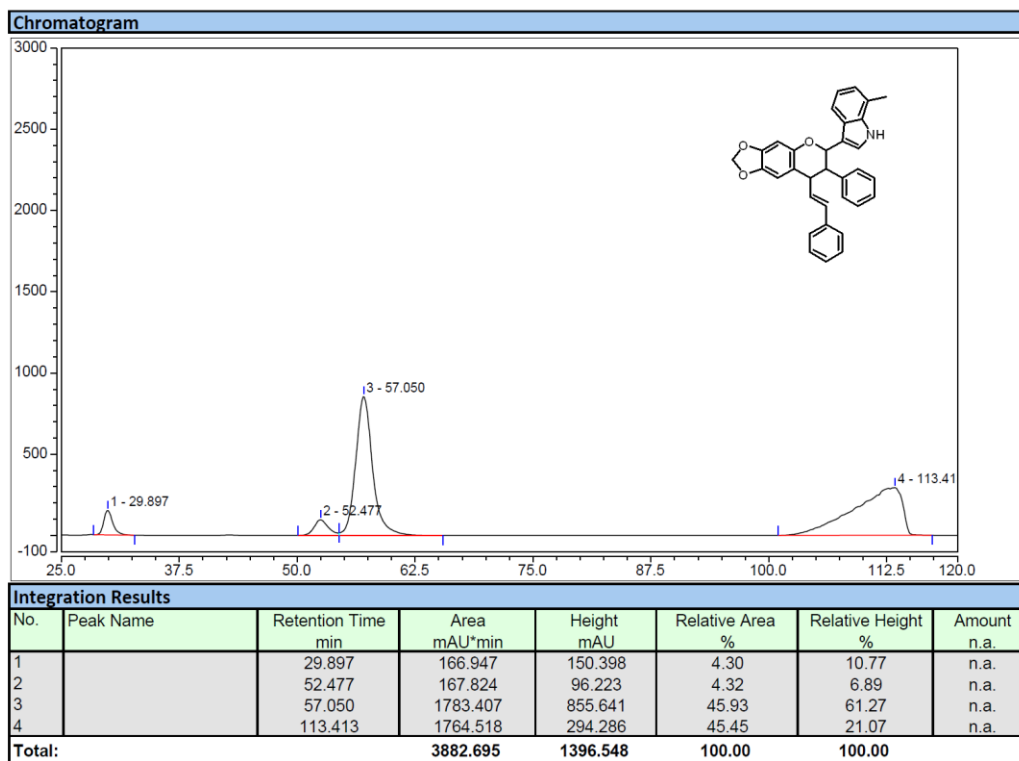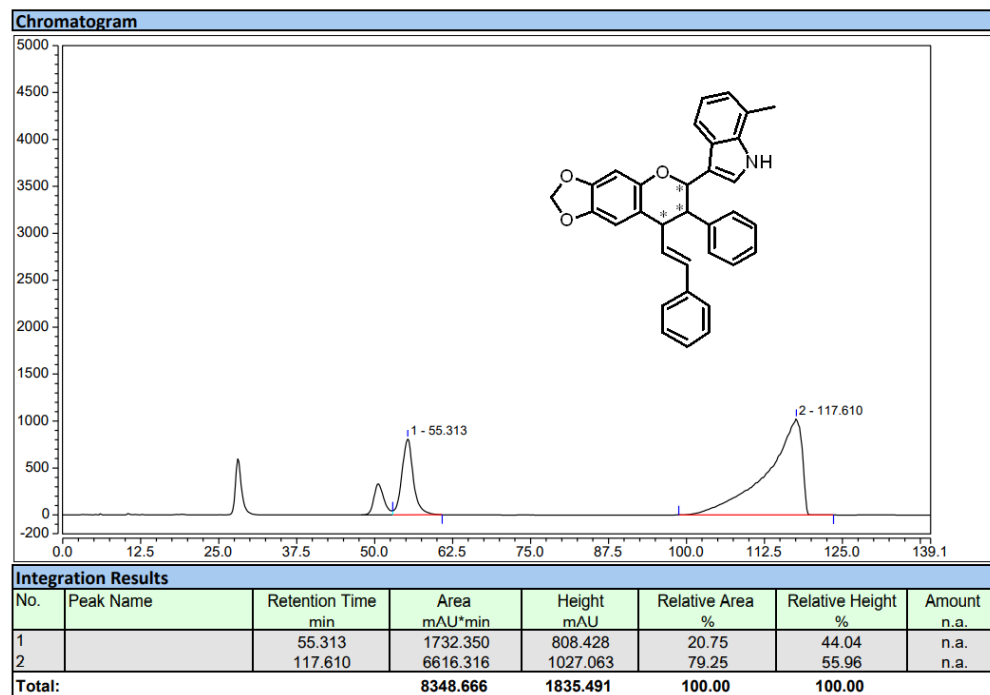



**3fa:** (inseparable diastereomers, 88:12 dr):

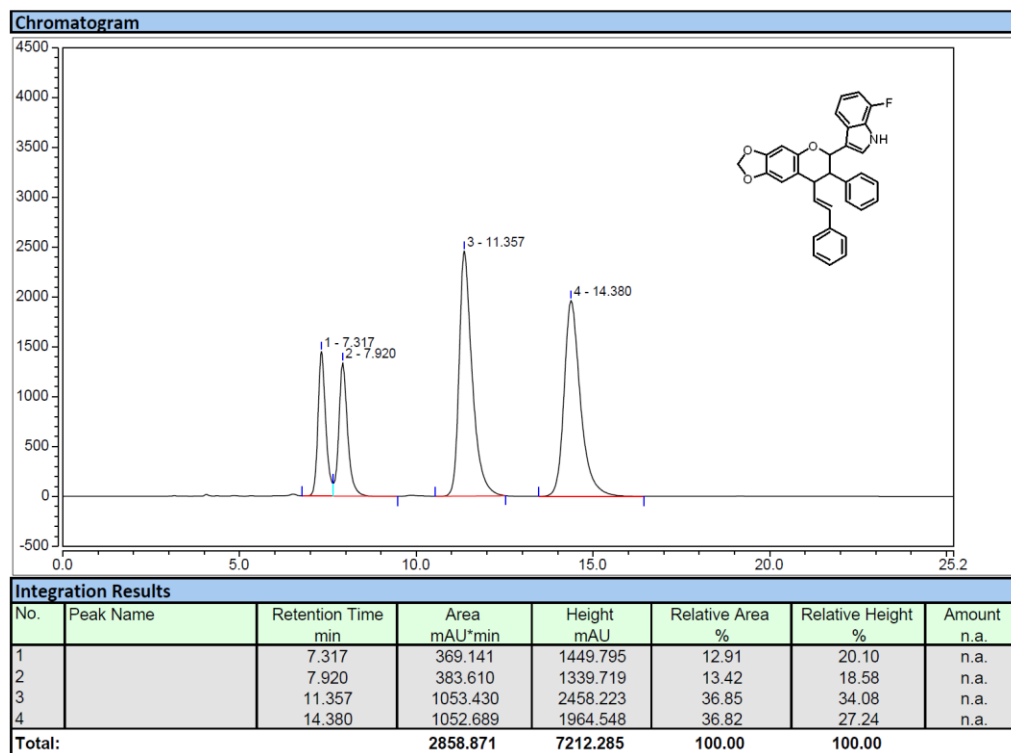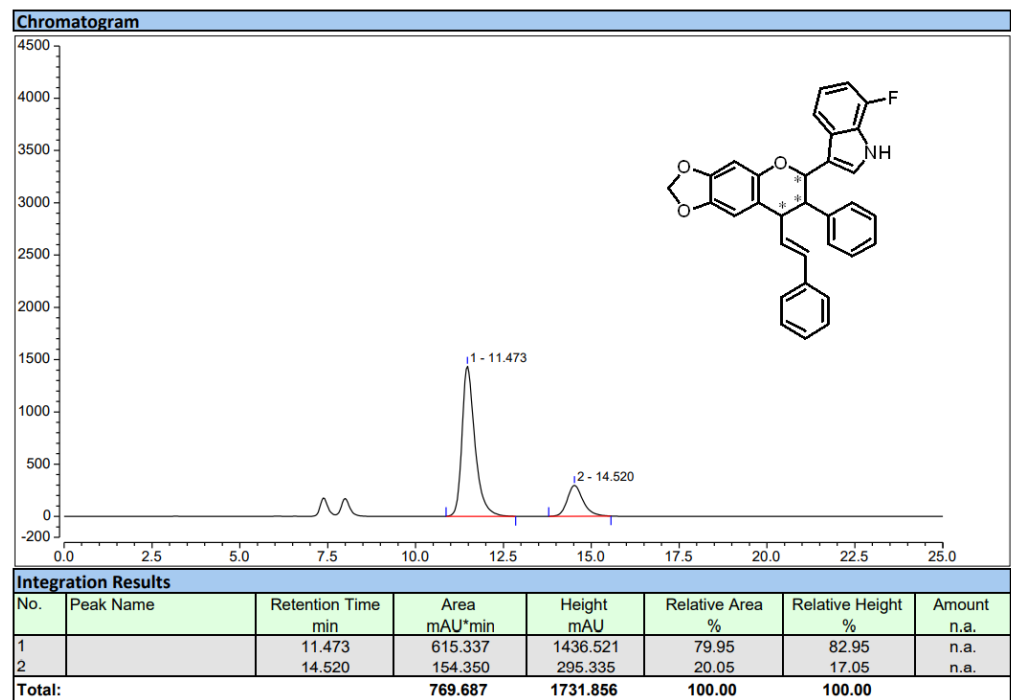

**3ga:** (inseparable diastereomers, 93:7 dr):

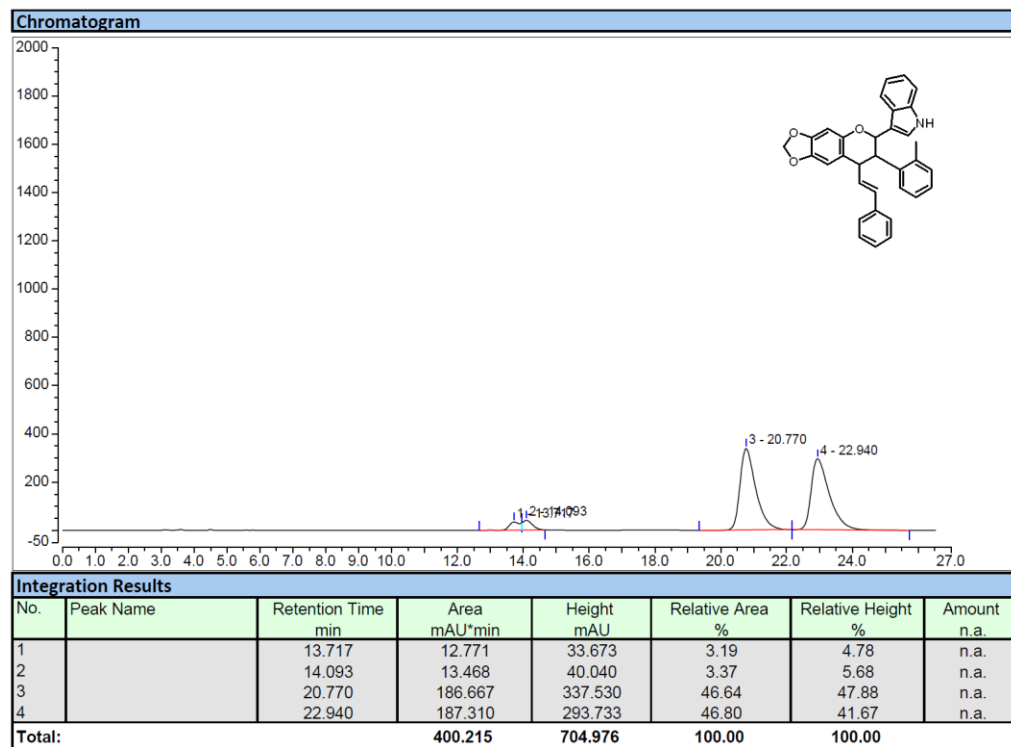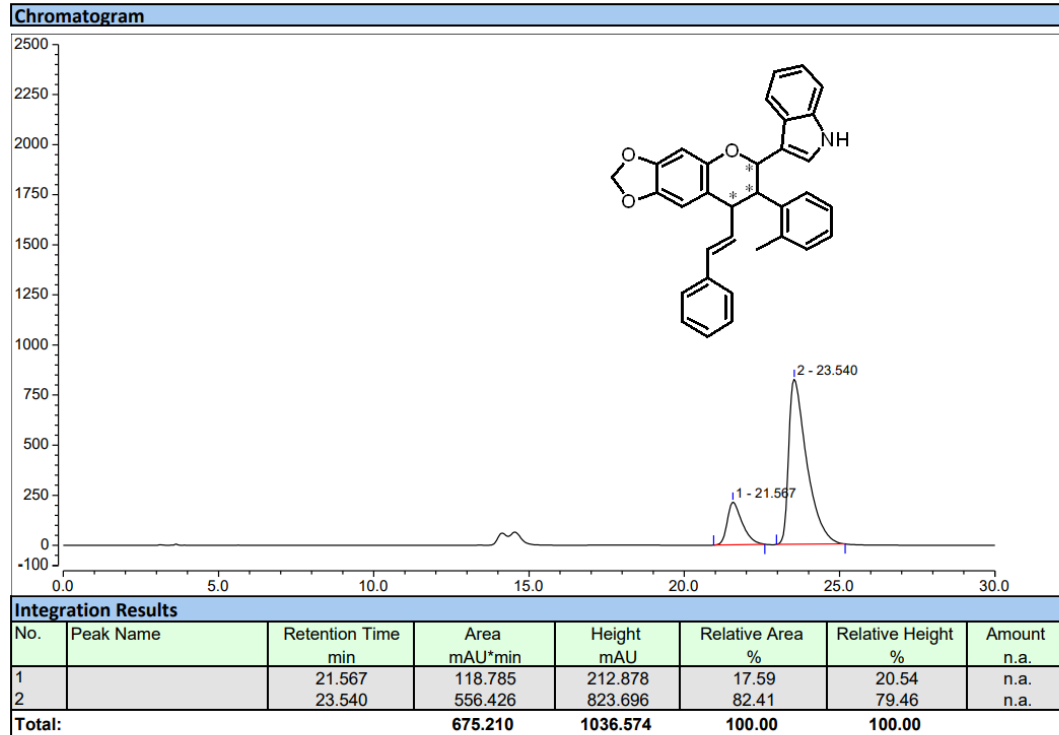

**3ha:** (inseparable diastereomers, 91:9 dr):

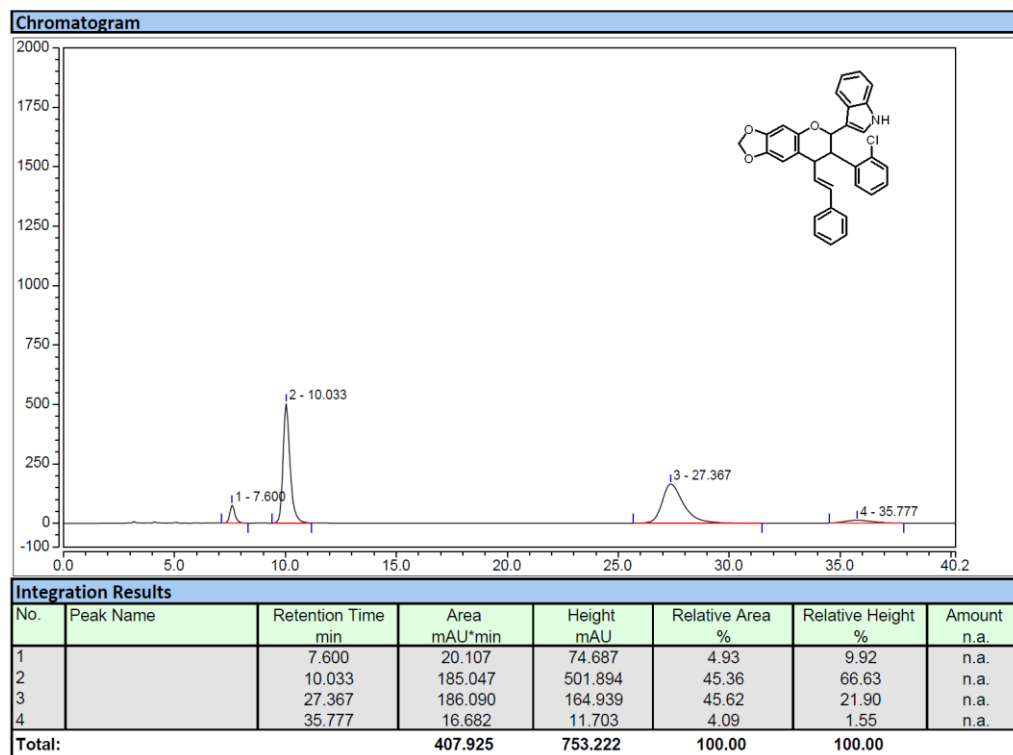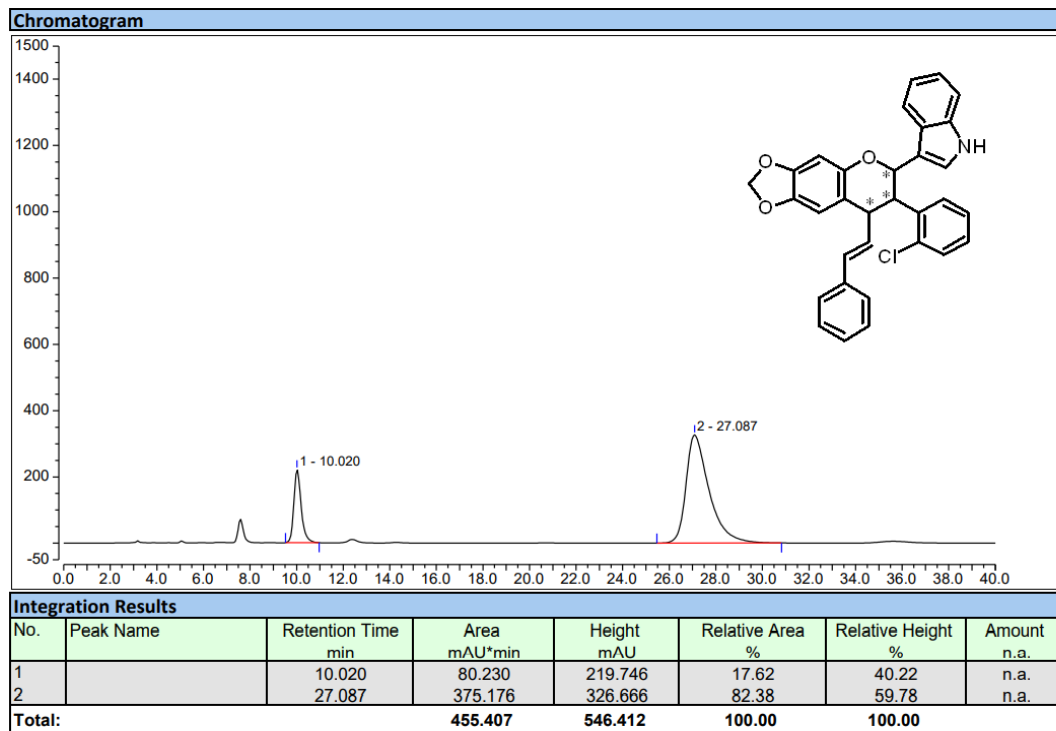

**3ia:** (inseparable diastereomers, 92:8 dr):

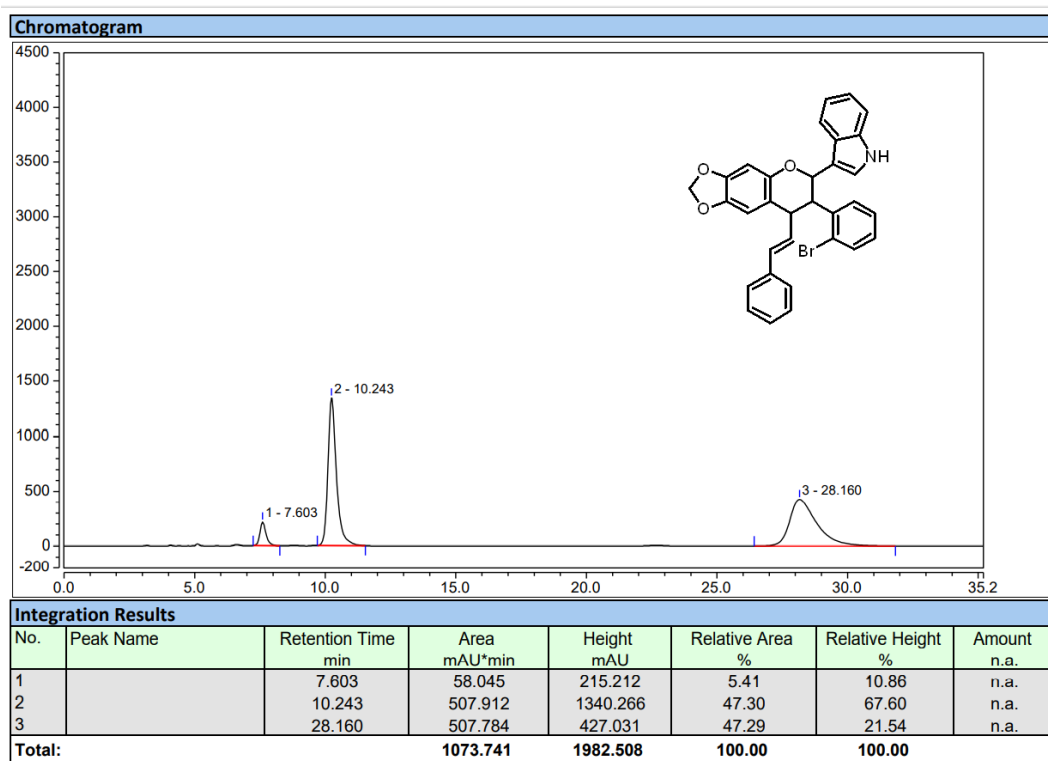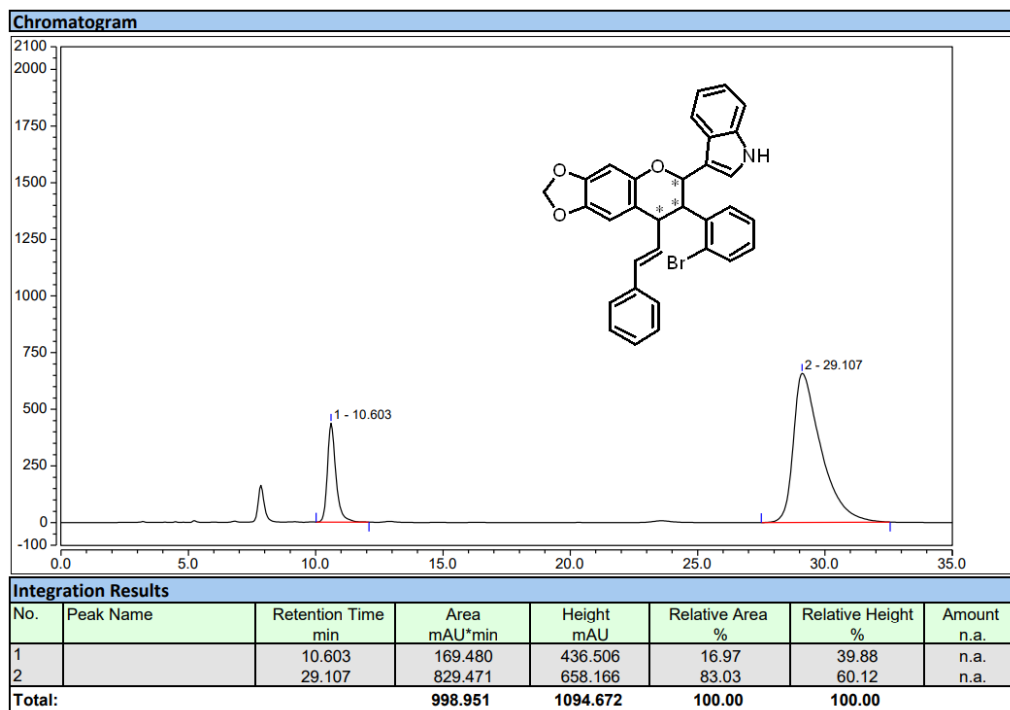

**3ja:** (inseparable diastereomers, 84:16 dr):

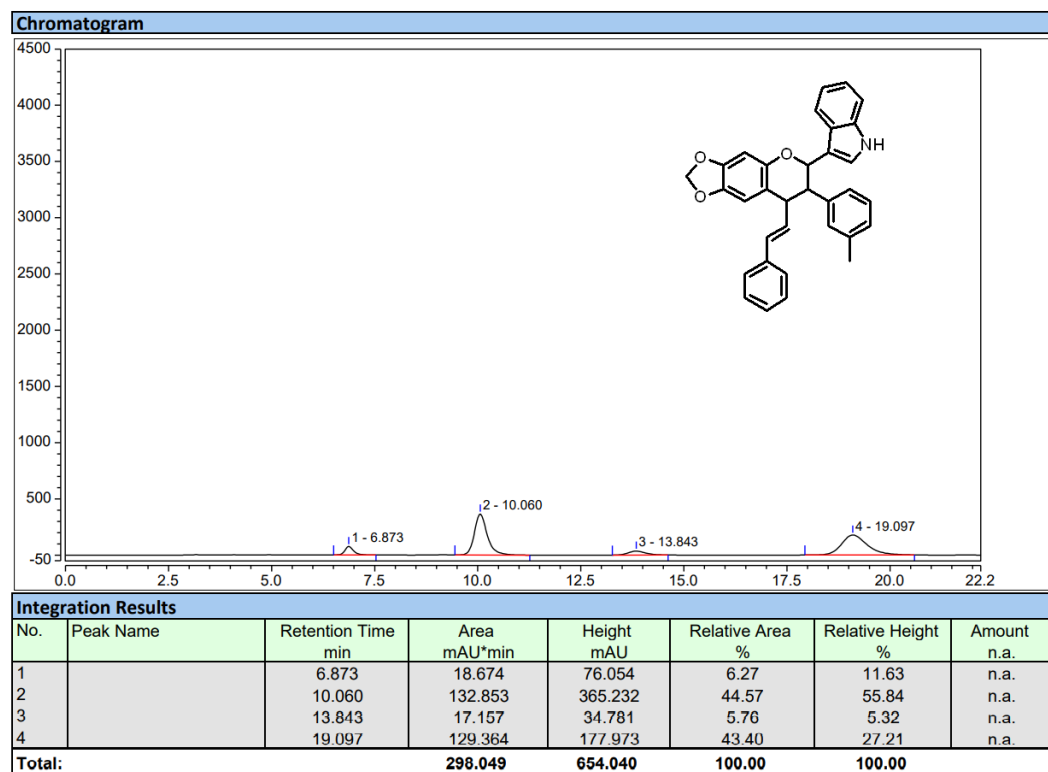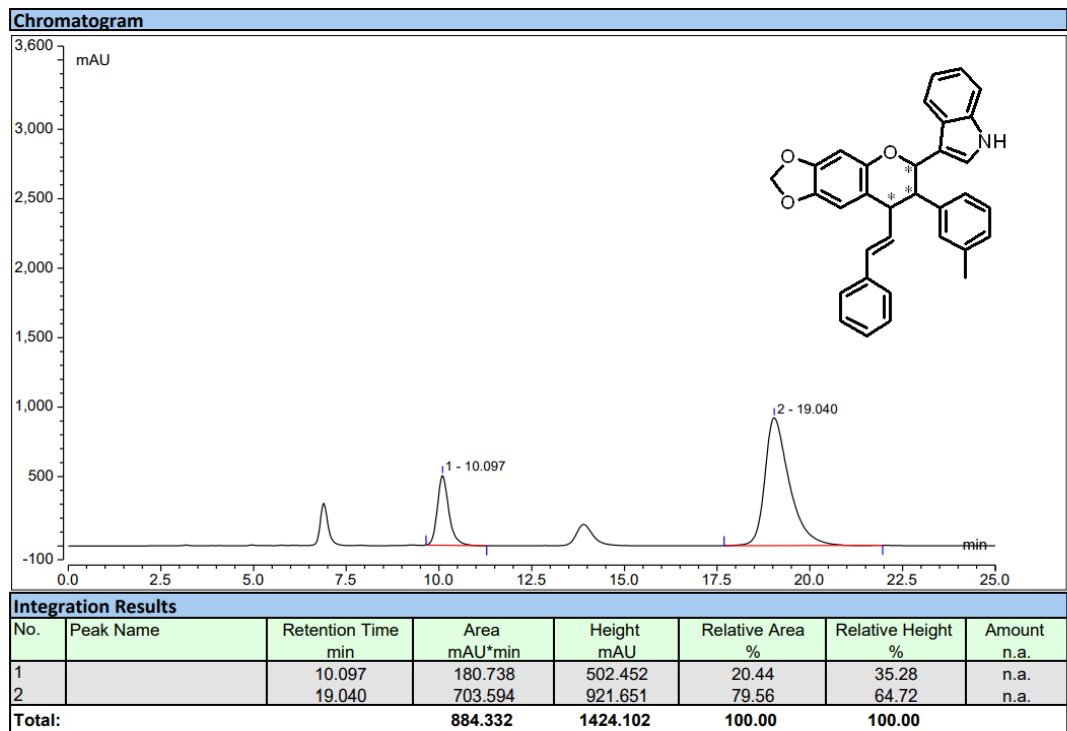

**3ka:** (inseparable diastereomers, 87:13 dr):

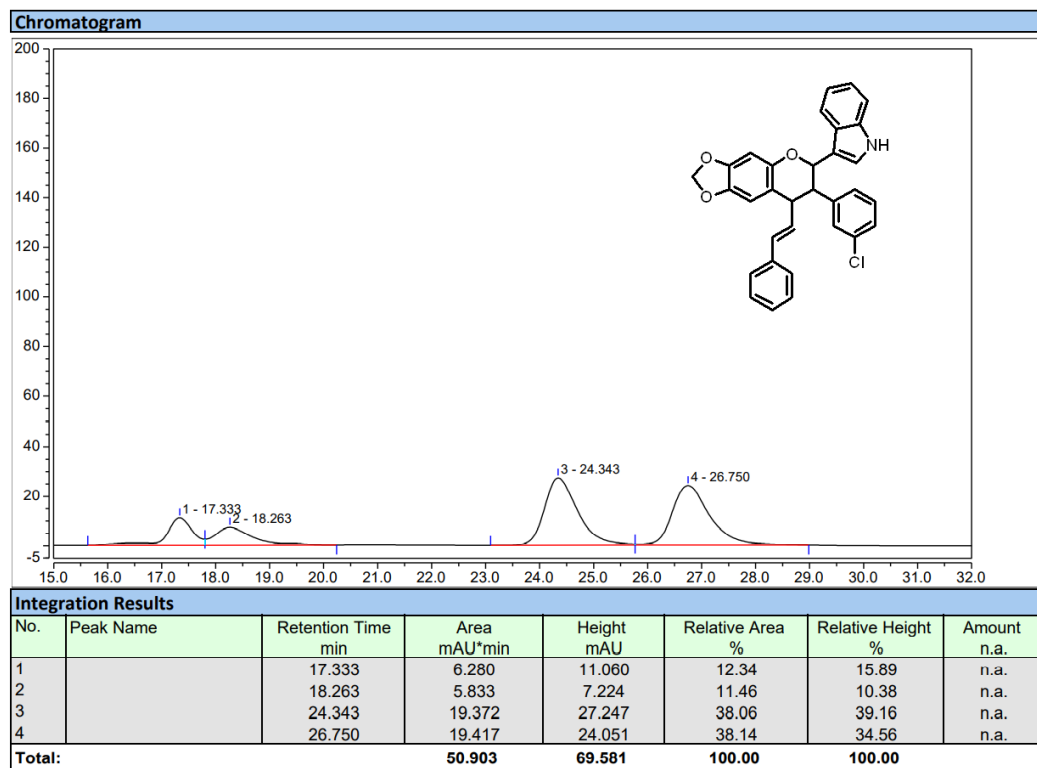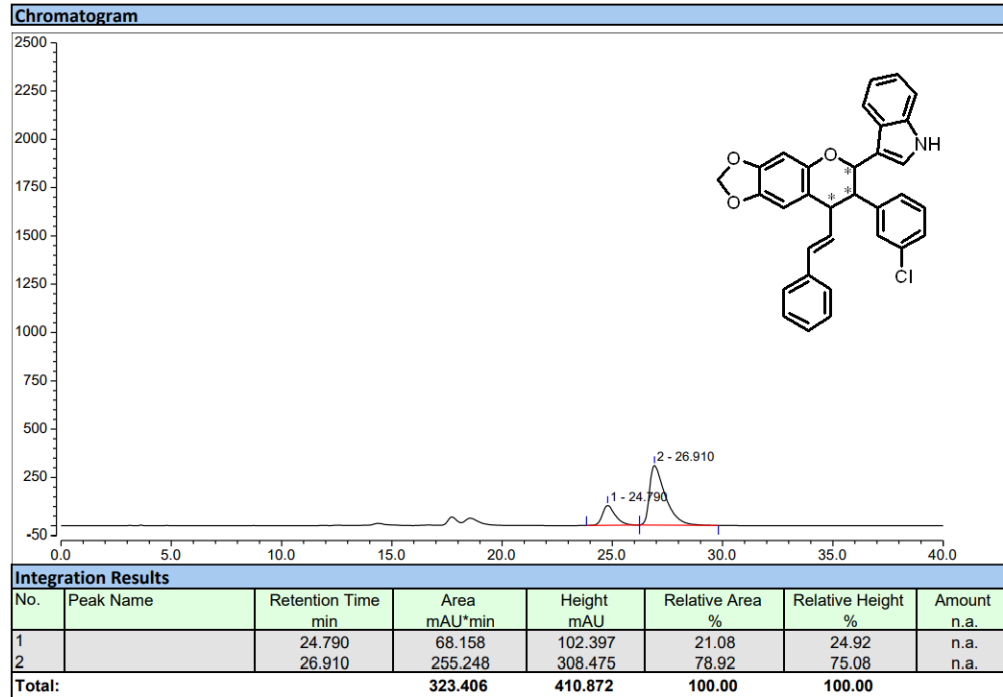

**3la:** (inseparable diastereomers, 78:22 dr):

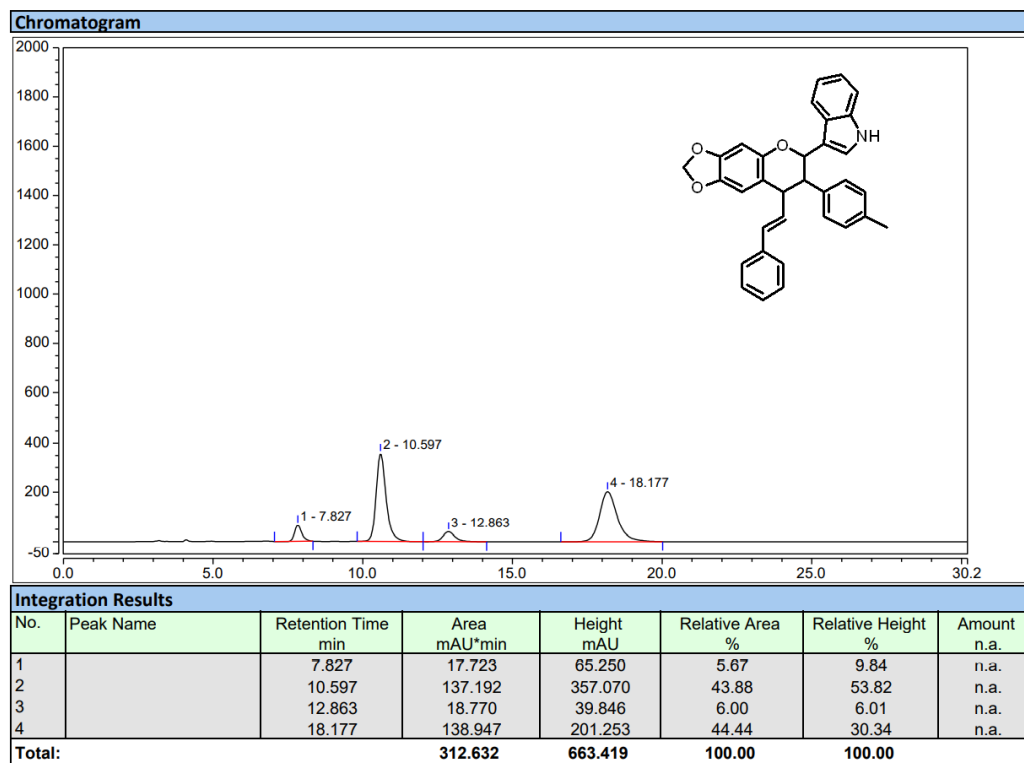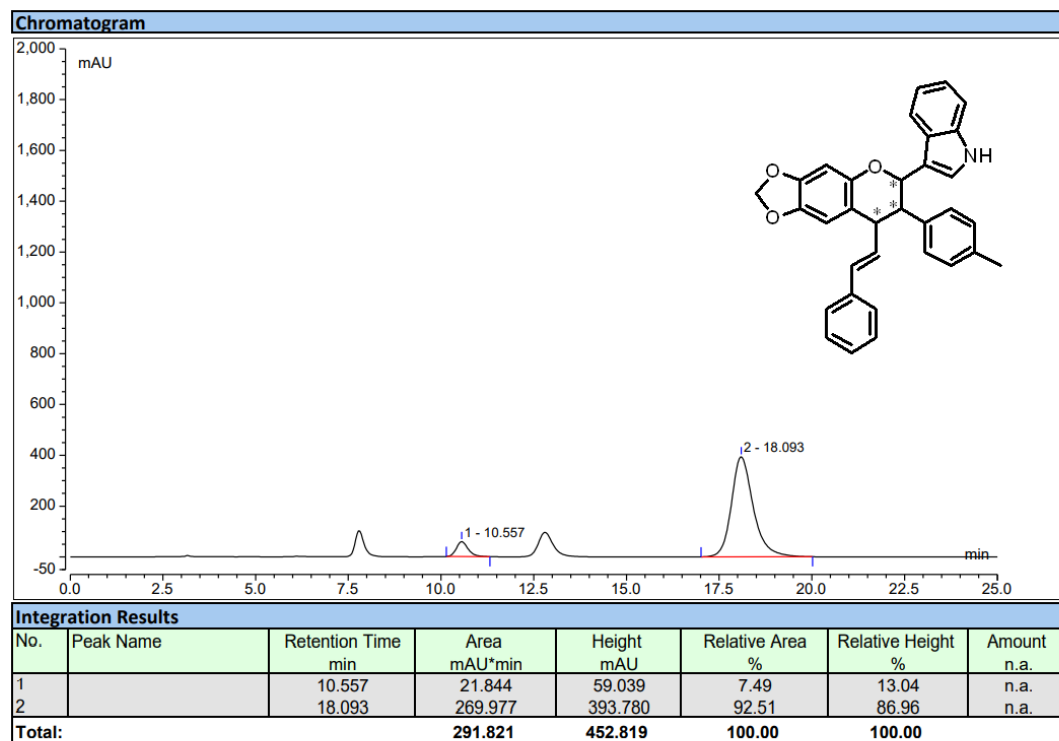

**3ma:** (inseparable diastereomers, 84:16 dr):

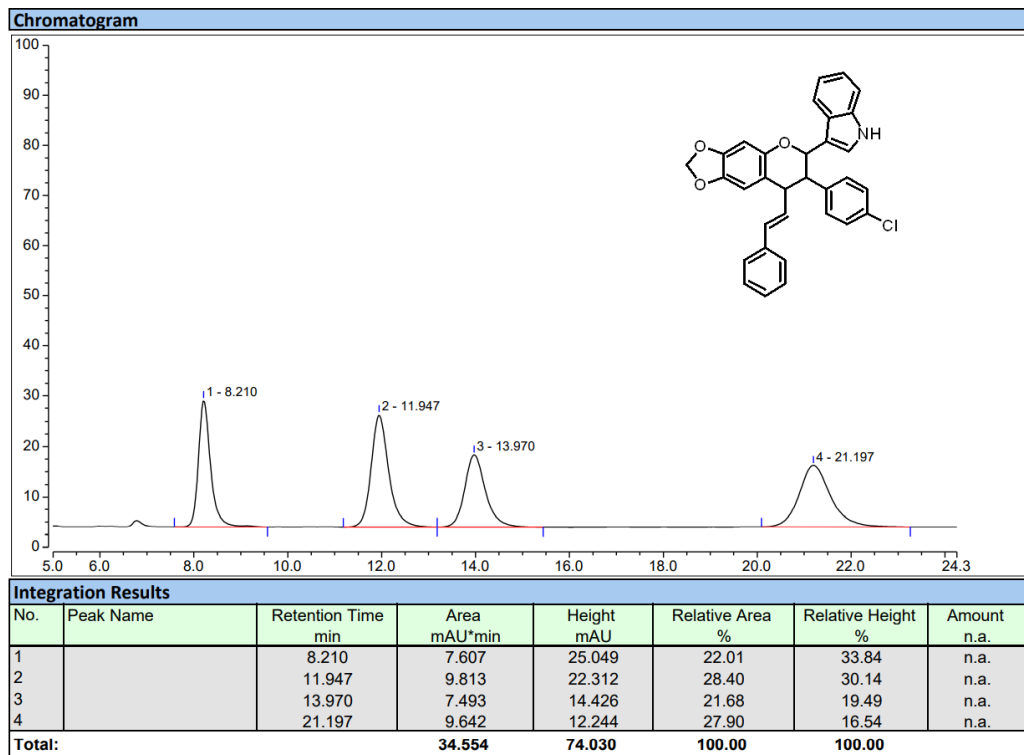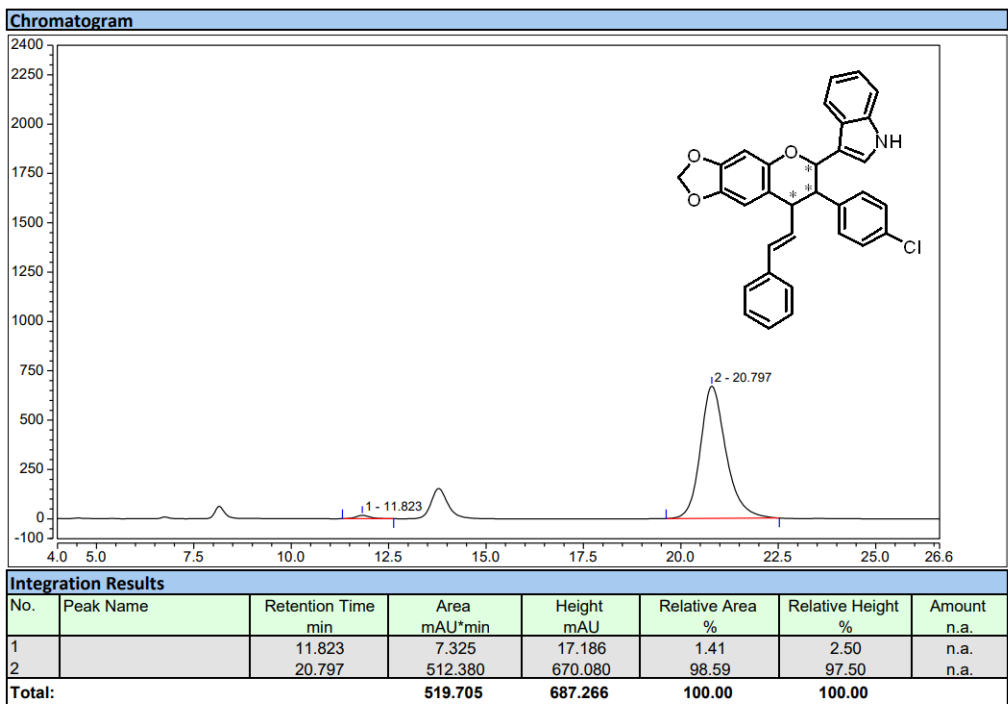



**3na:** (inseparable diastereomers, 86:14 dr):

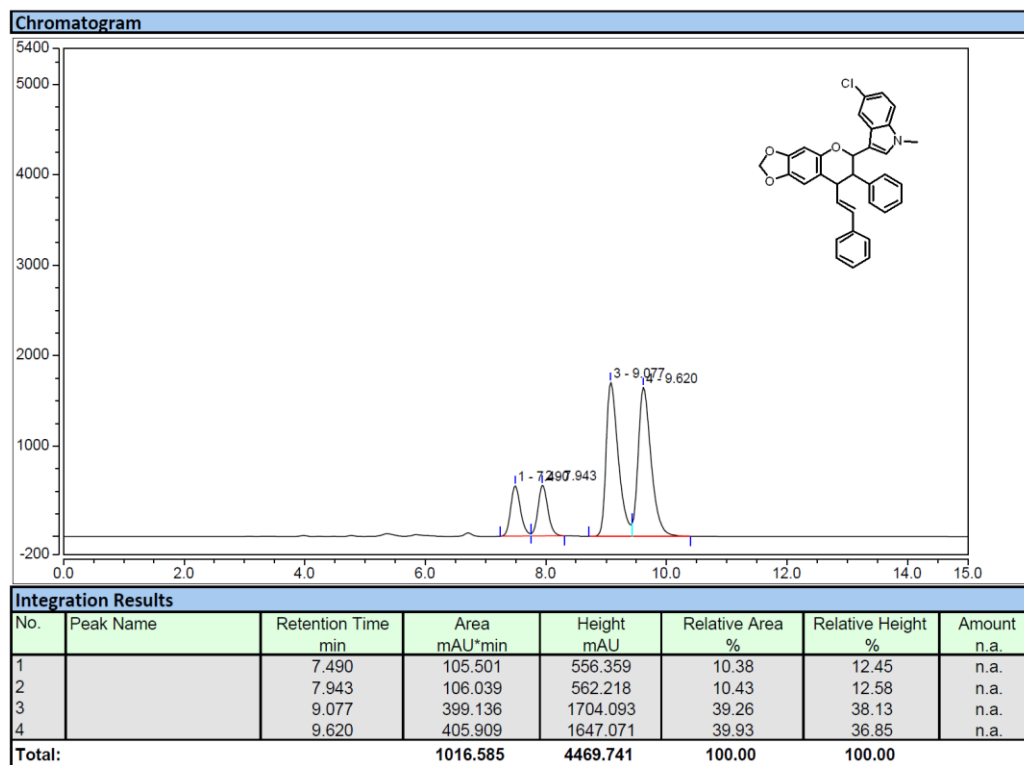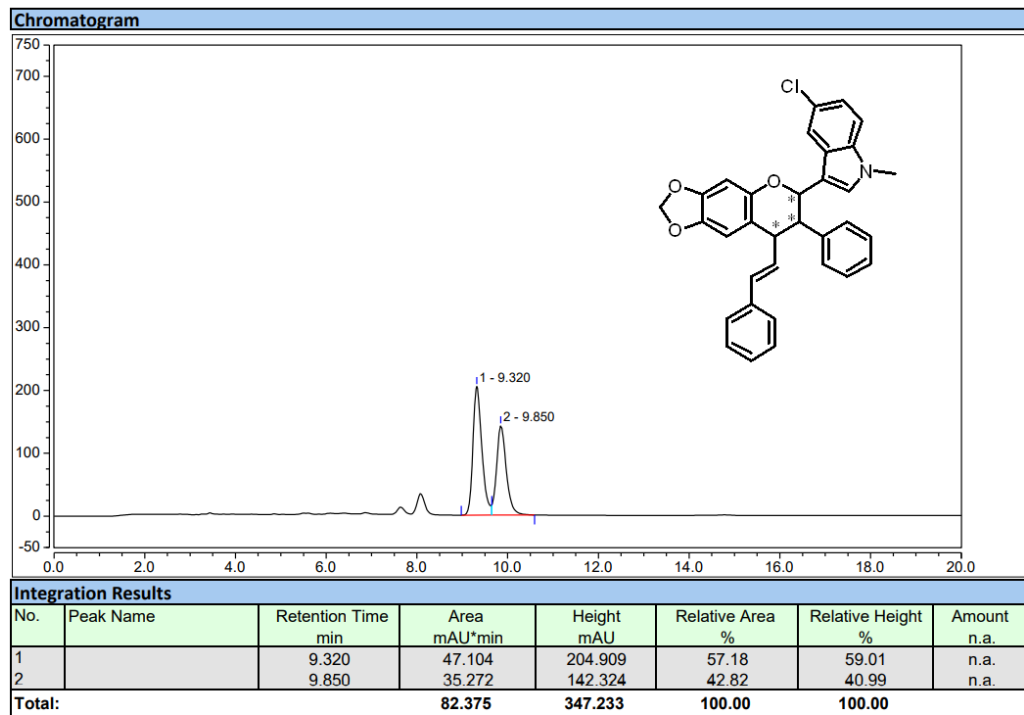

**30a:** (inseparable diastereomers, 91:9 dr)

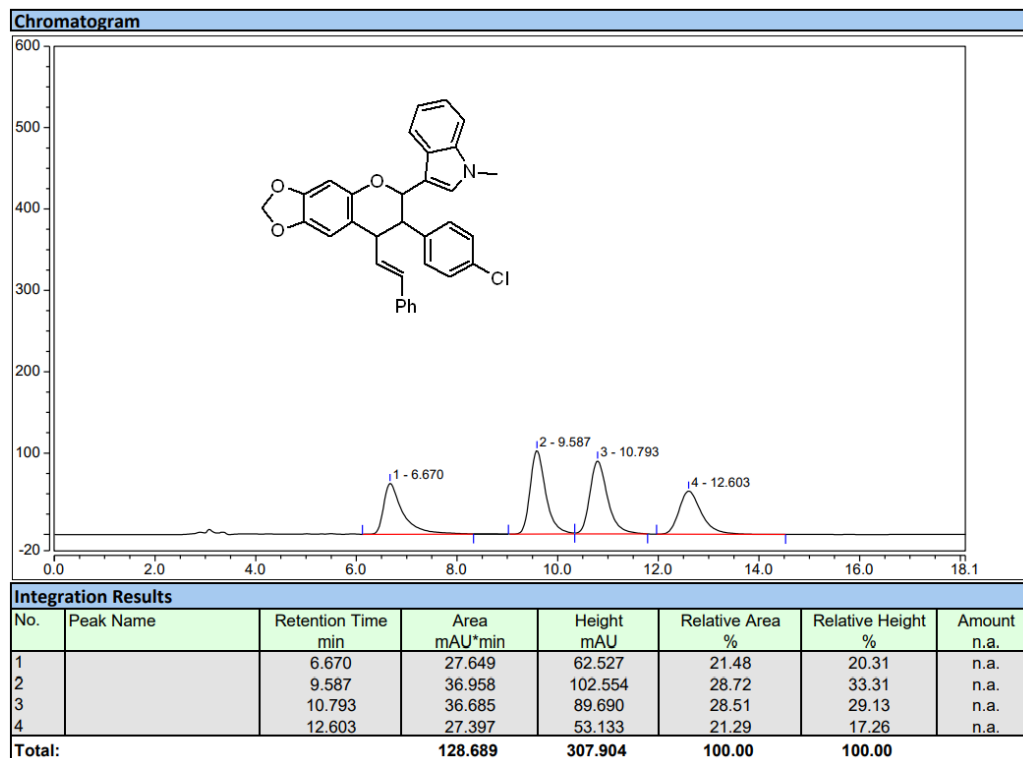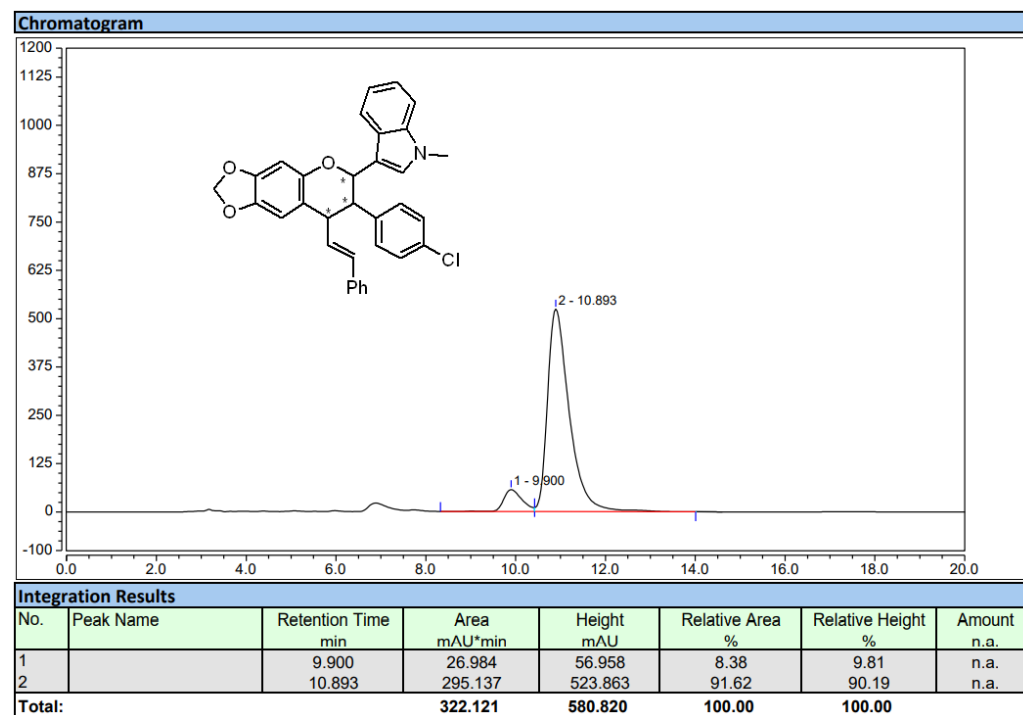

**3ab:** (inseparable diastereomers, 88:12 dr):

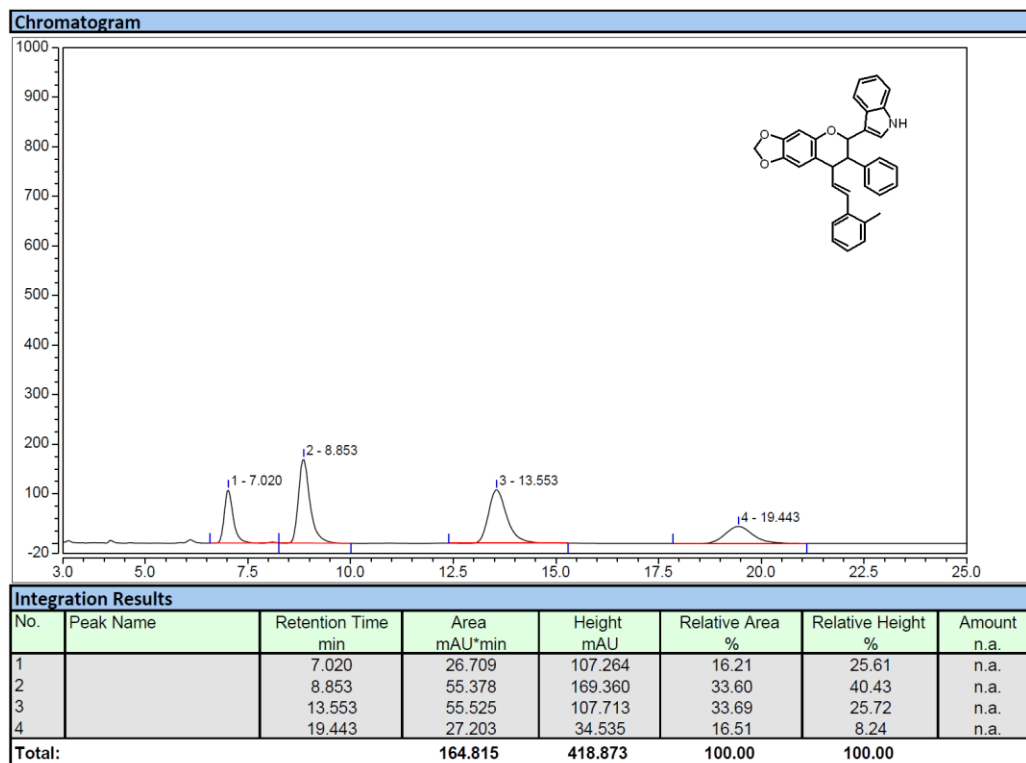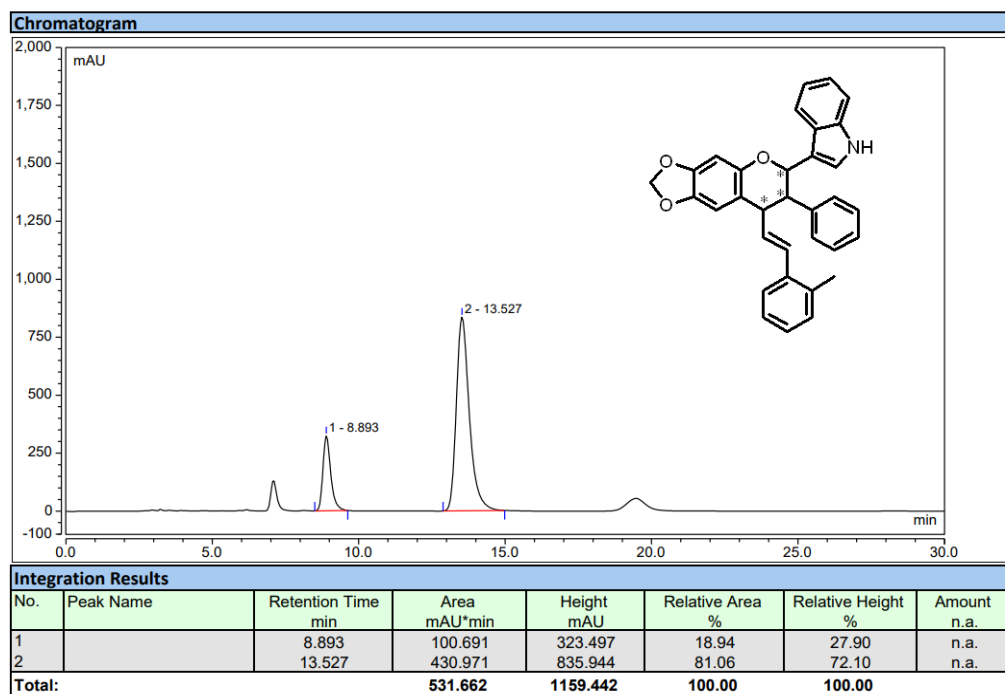

**3ac:** (inseparable diastereomers, 86:14 dr):

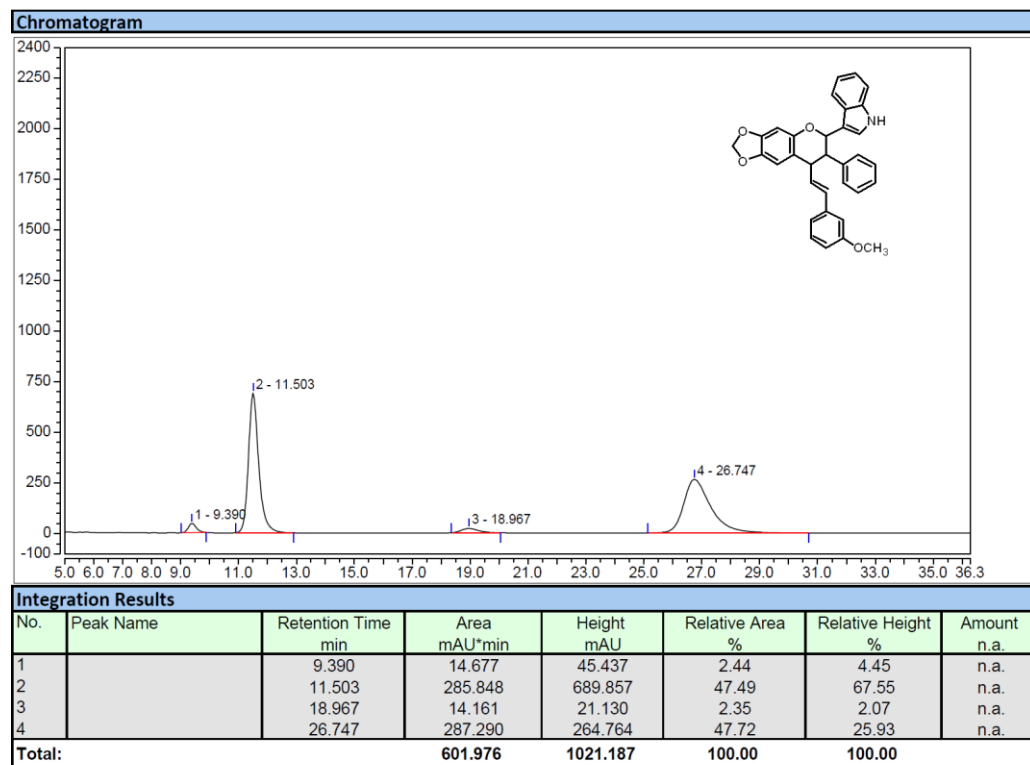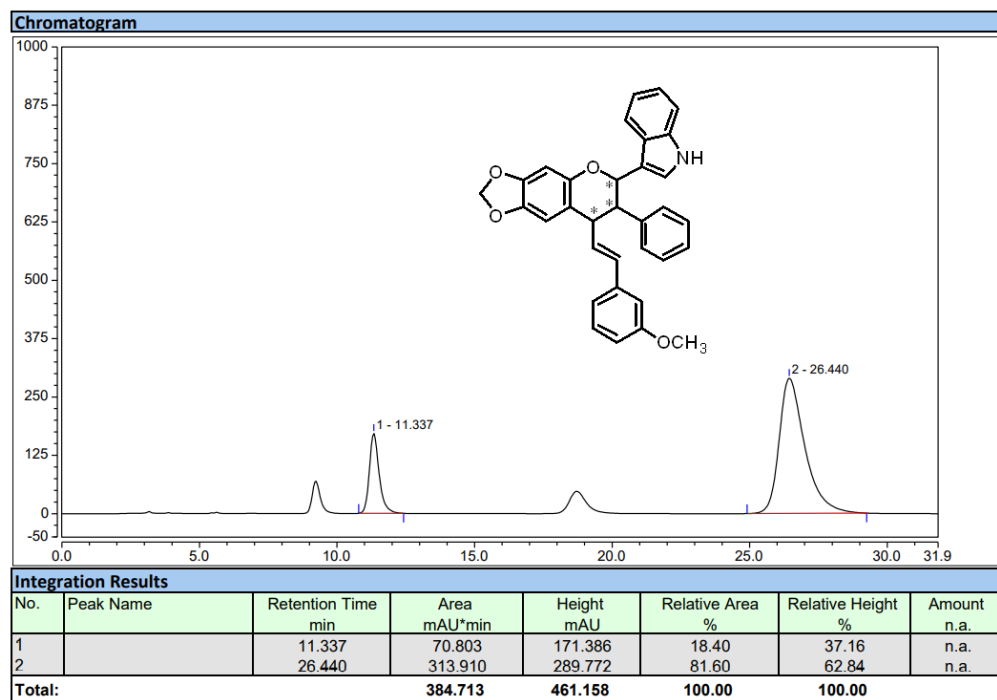

**3ad:** (inseparable diastereomers, 85:15 dr):

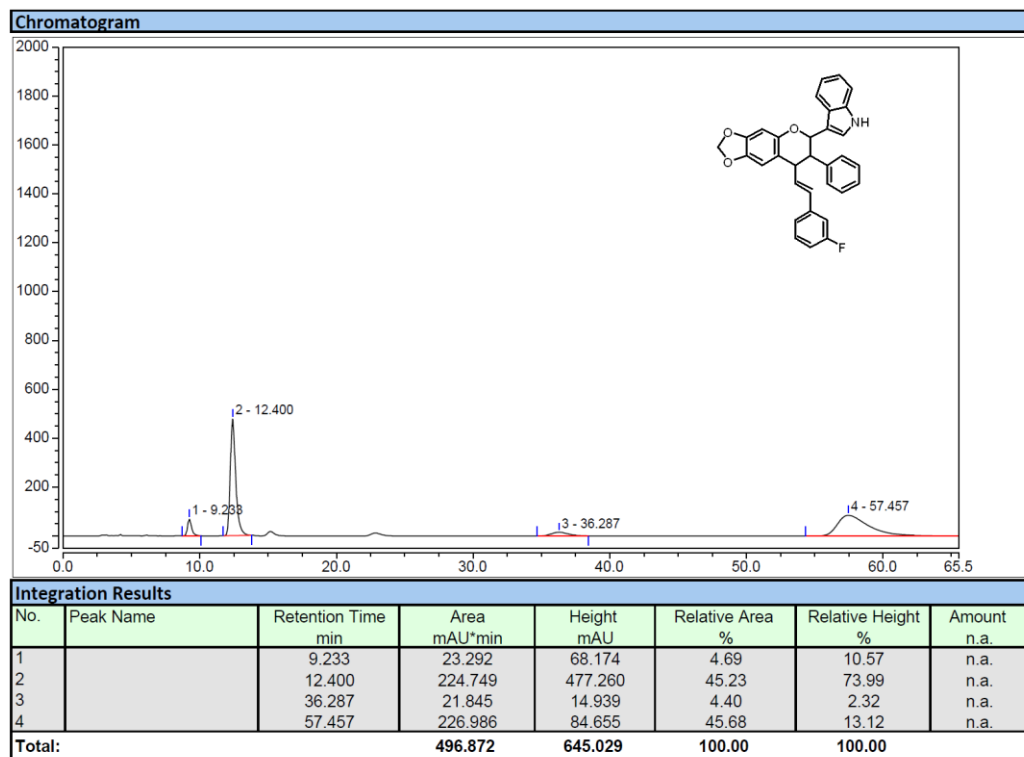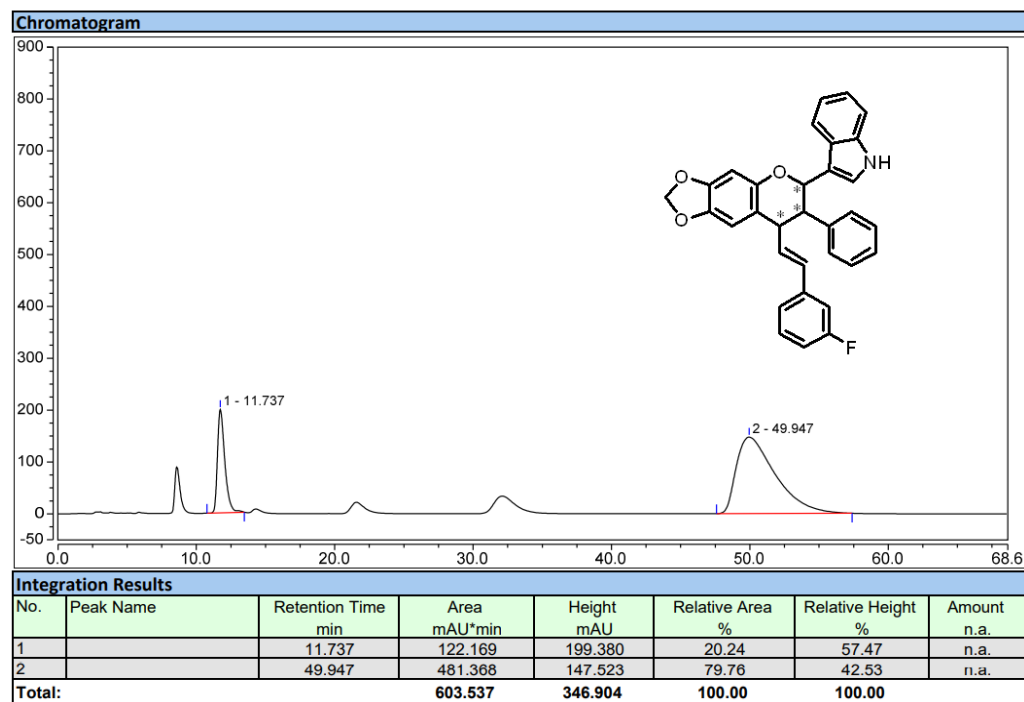

**3ae:** (inseparable diastereomers, 89:11 dr):

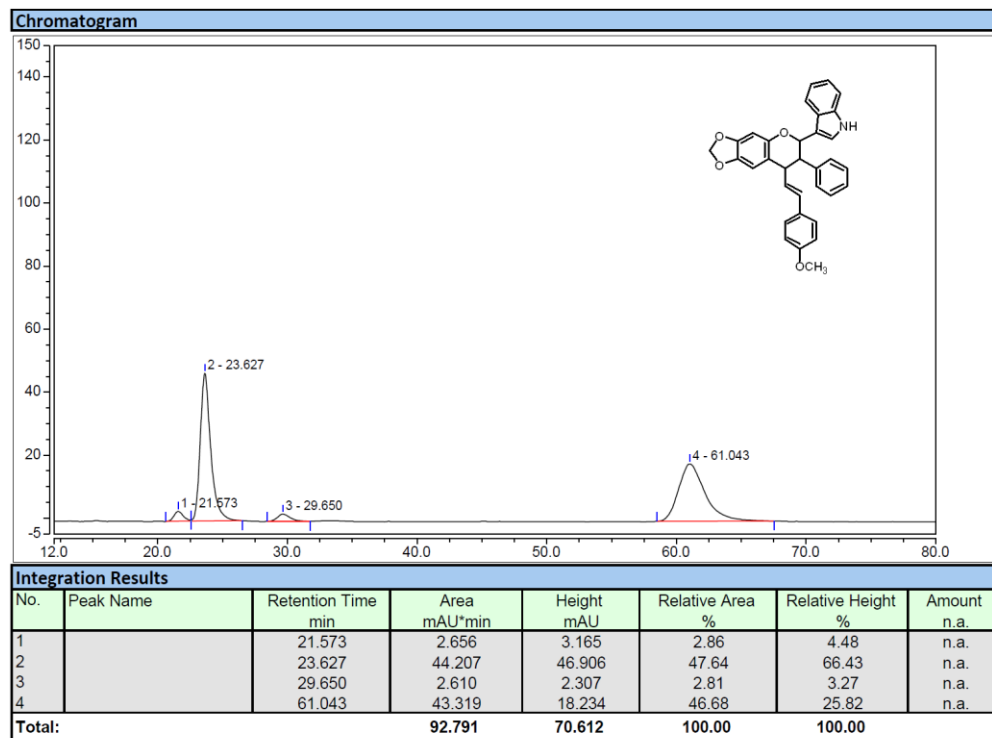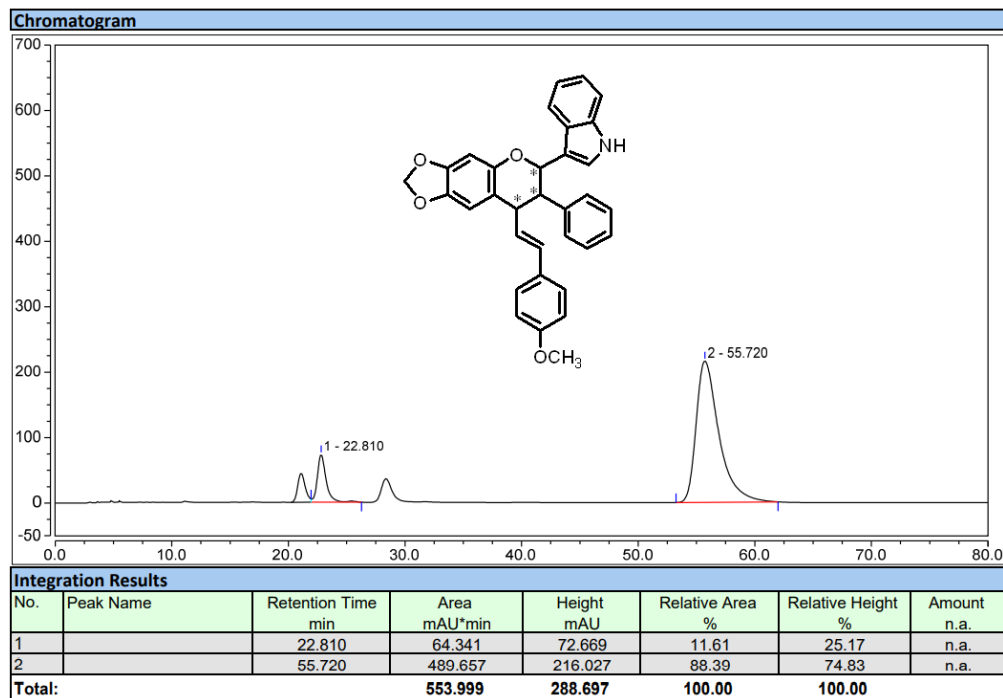

**3af:** (inseparable diastereomers, 75:25 dr):

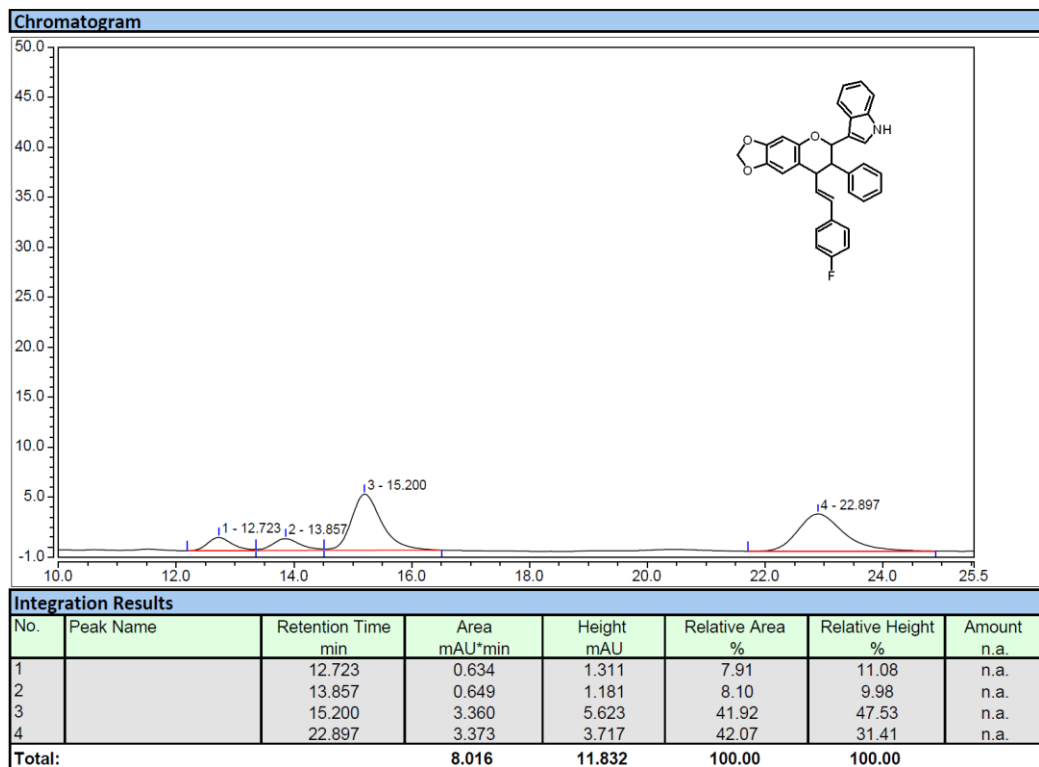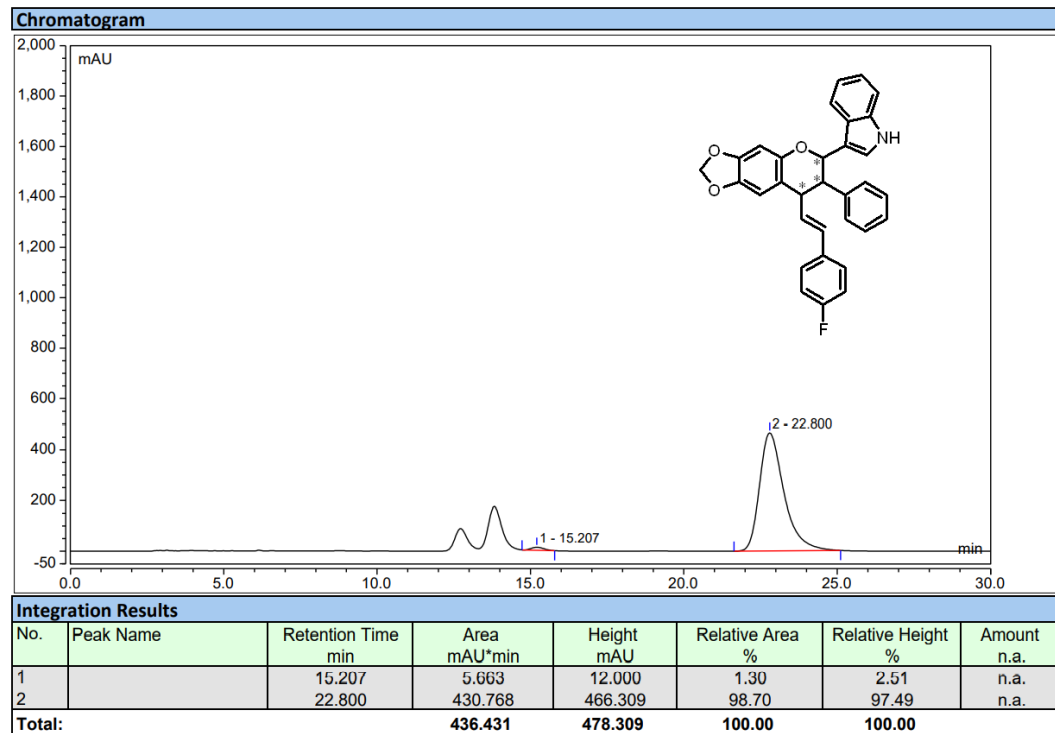

**3ag:** (inseparable diastereomers, 84:16 dr):

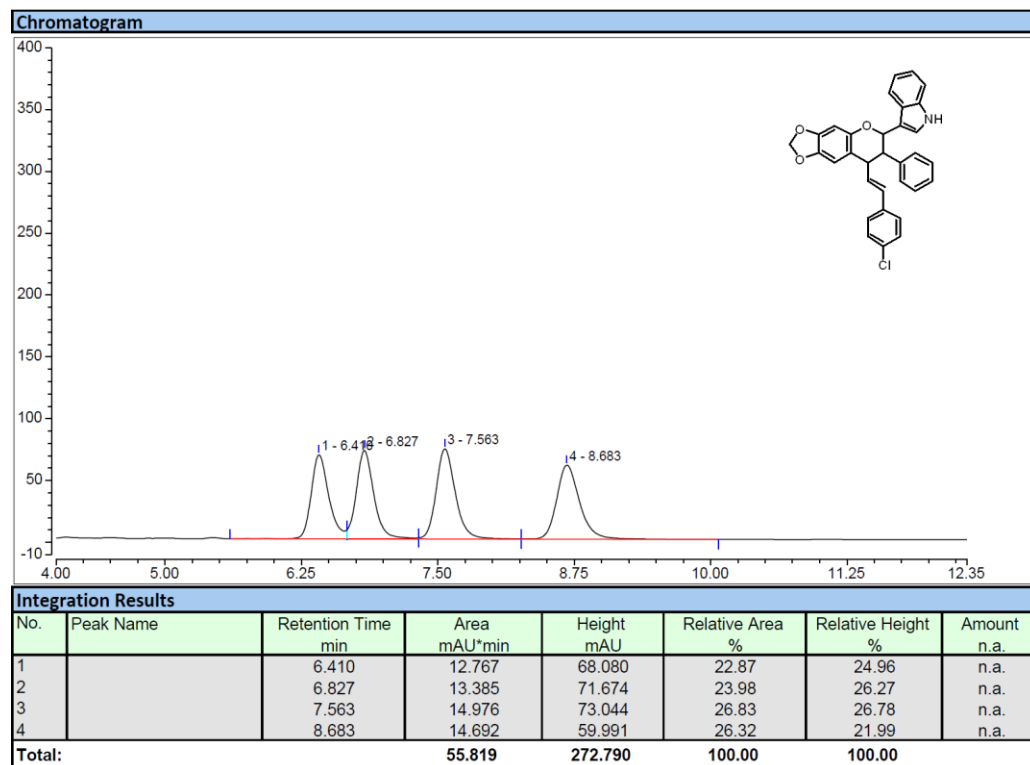



**3ah:** (inseparable diastereomers, 85:15 dr):

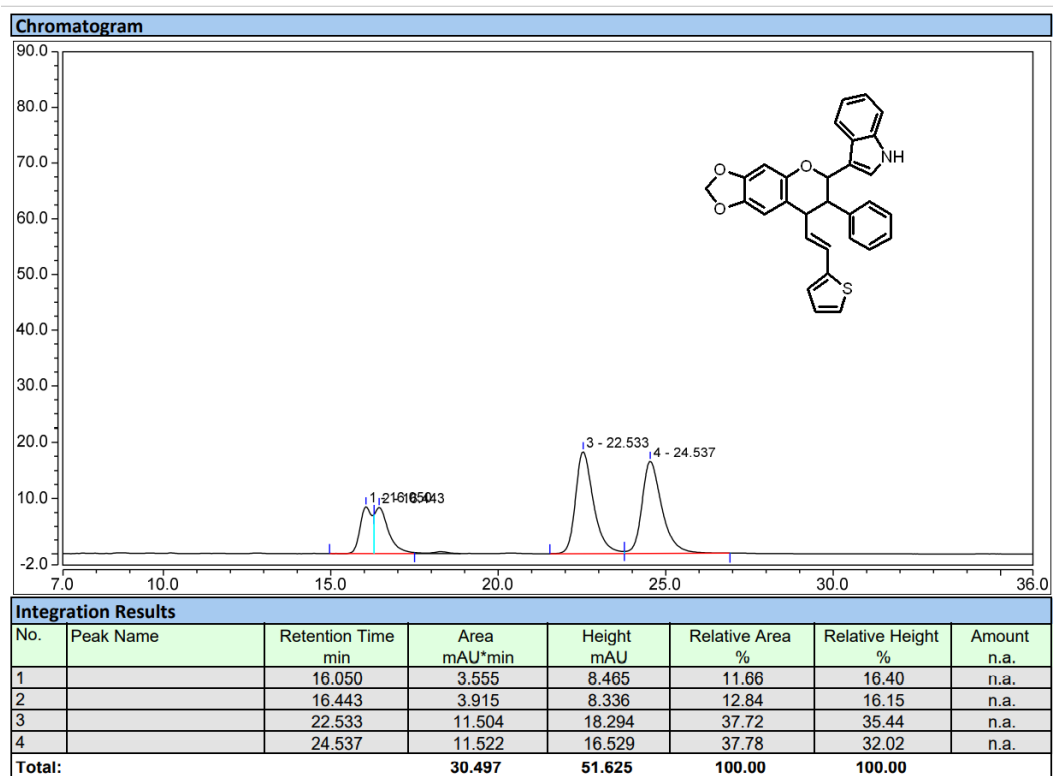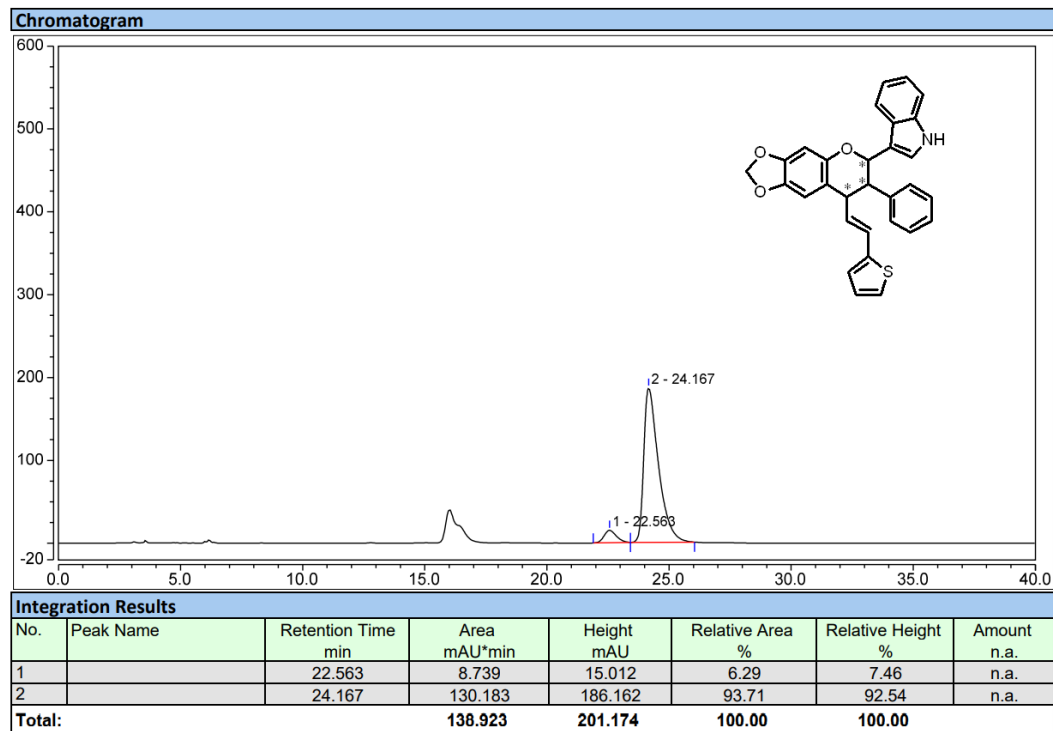

#### 4. HPLC spectra of products 6

6aa:

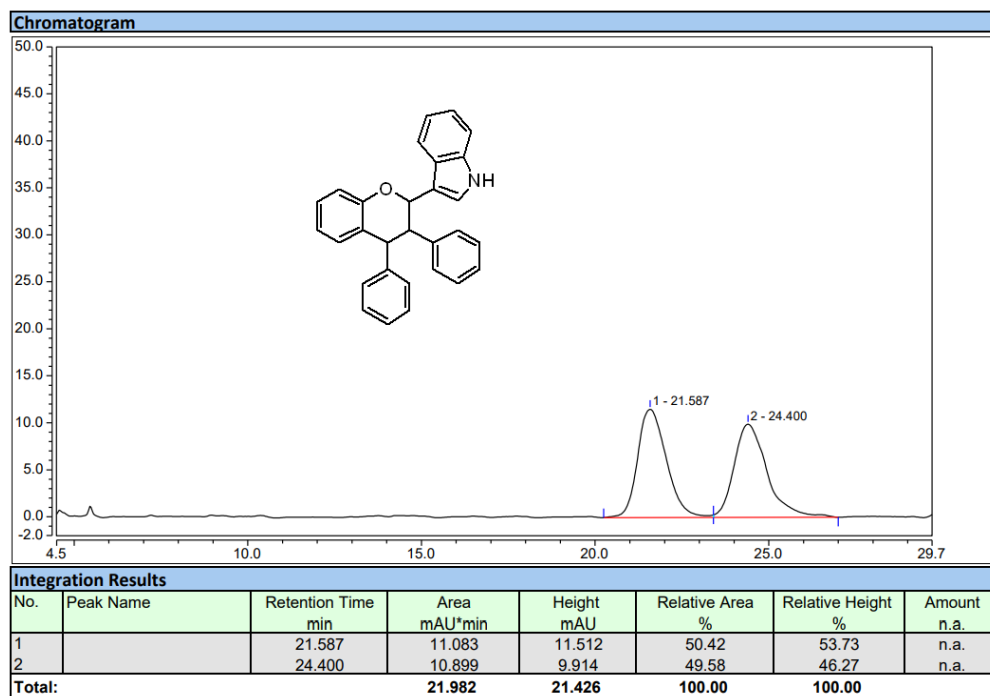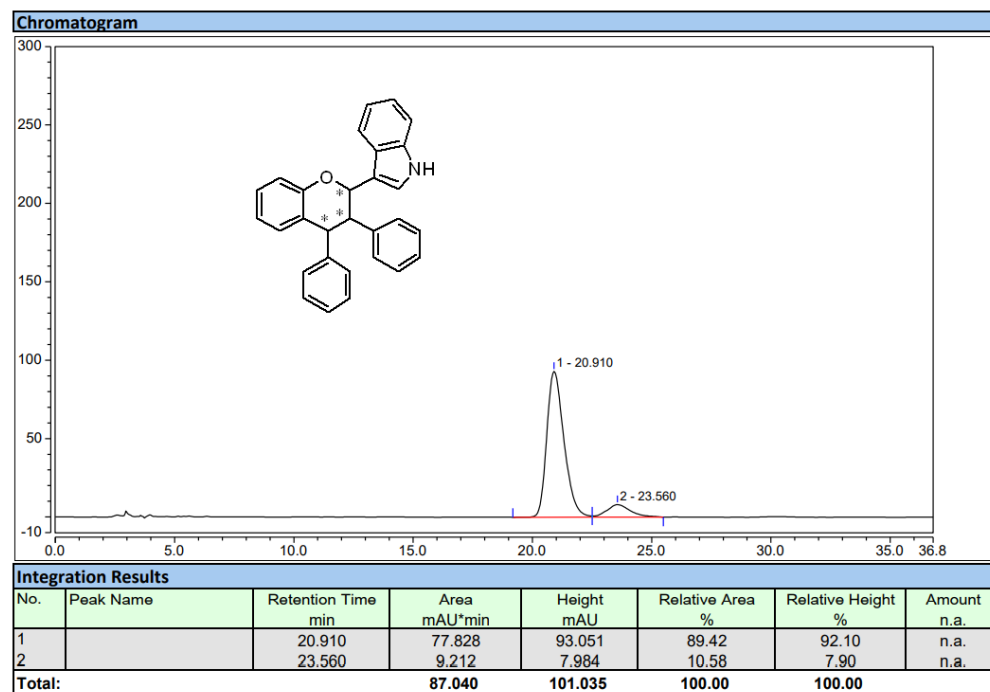

6ba:

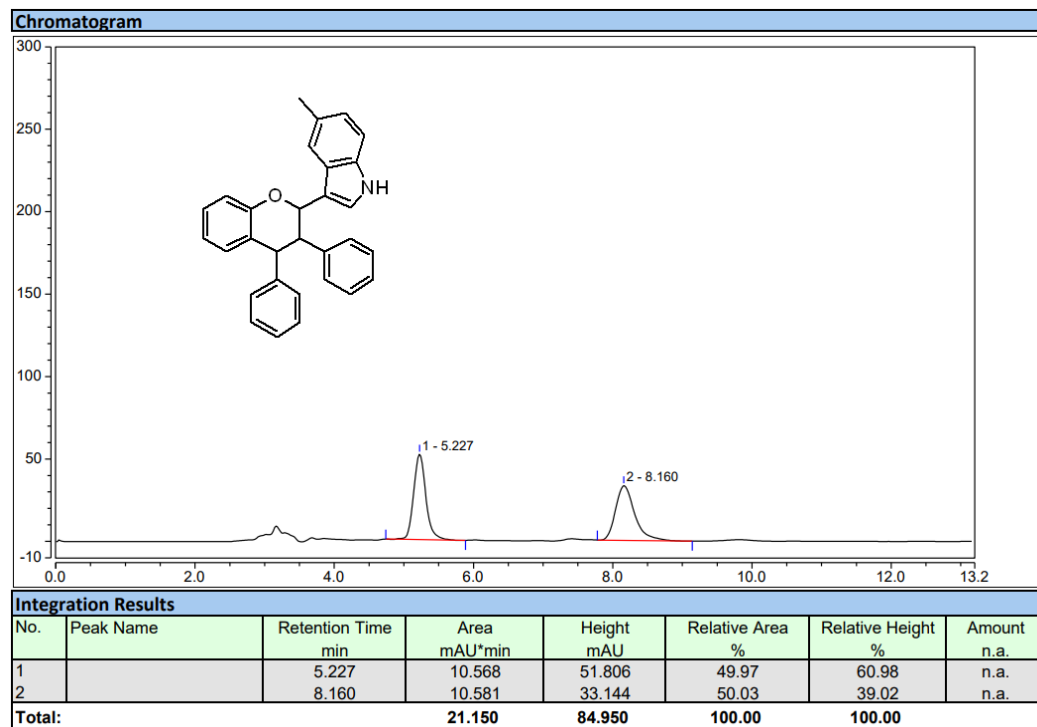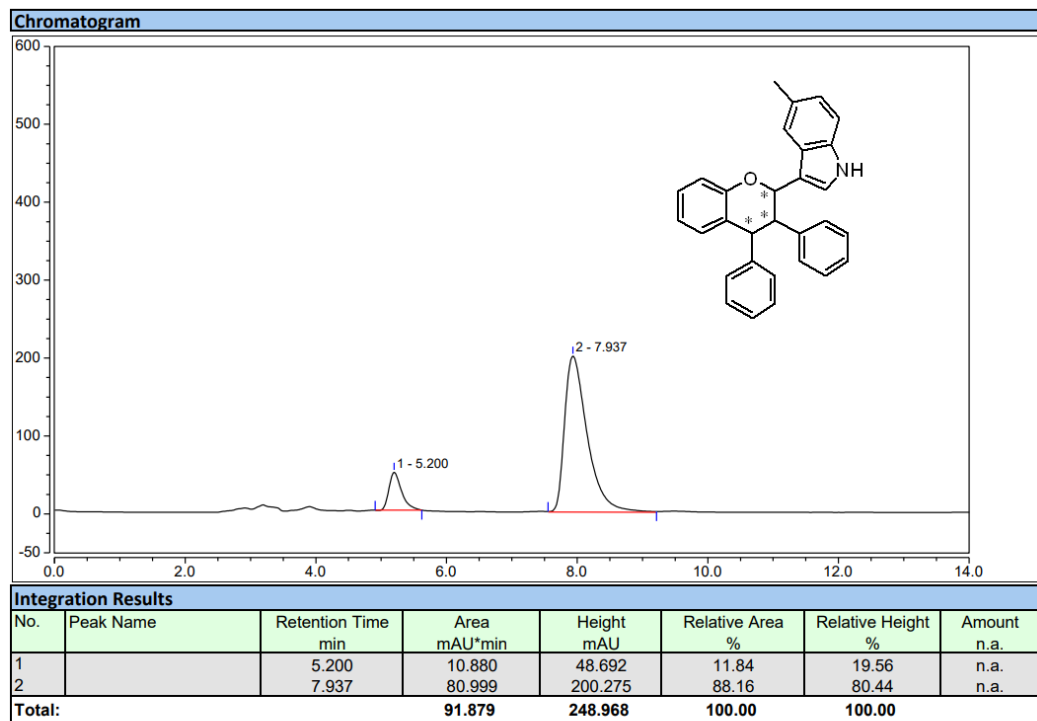

6pa:

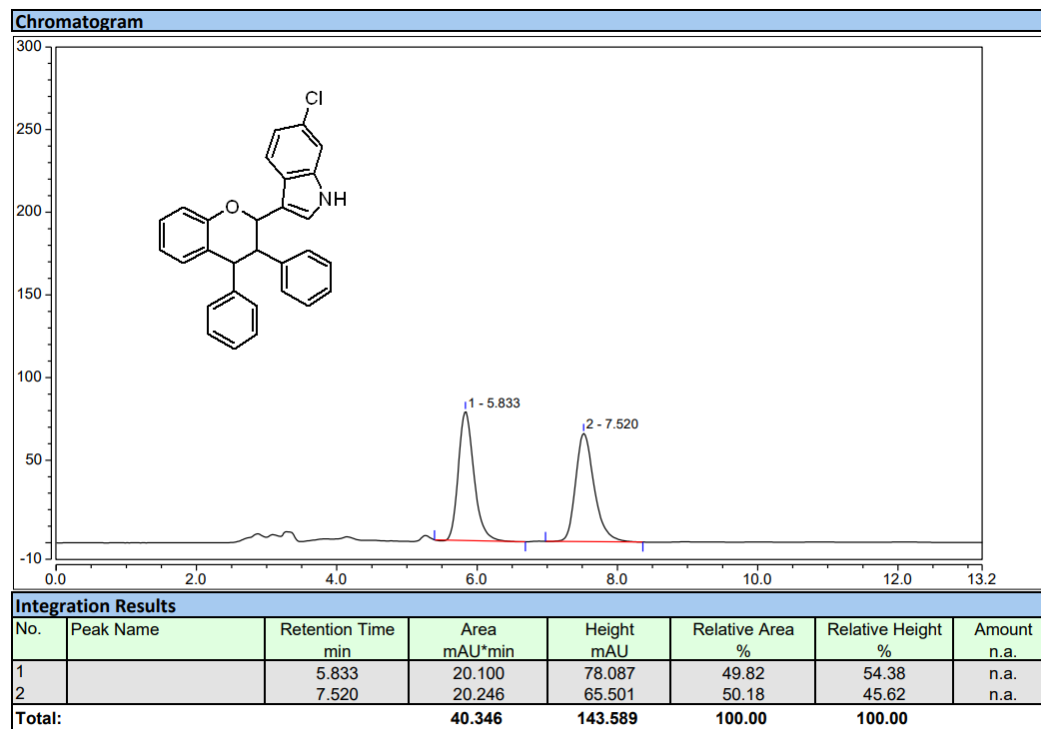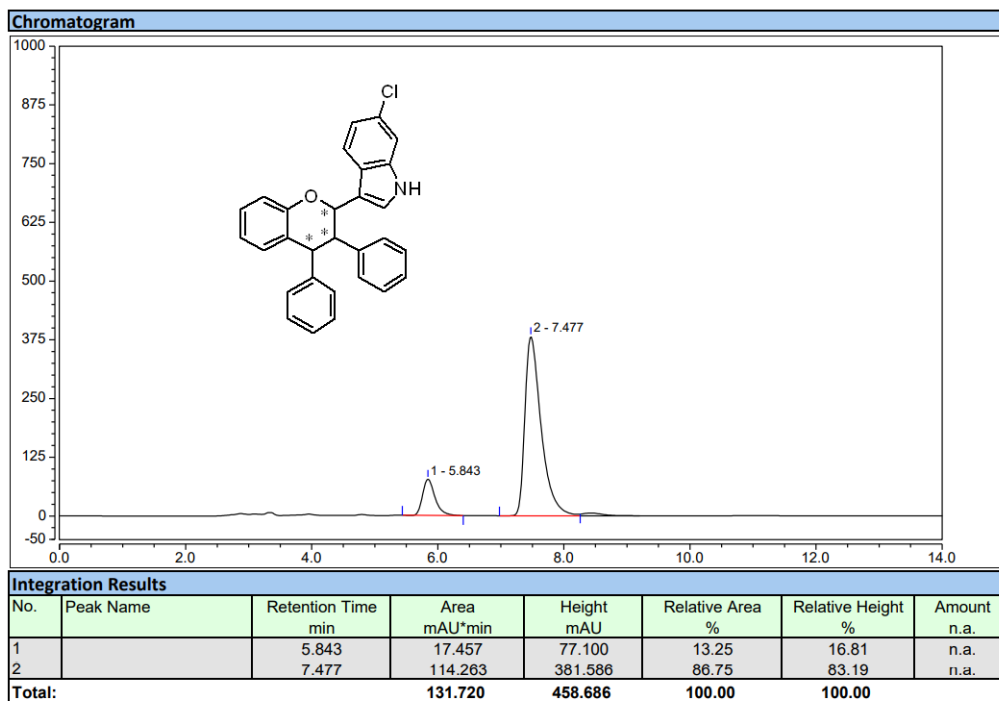

6da:

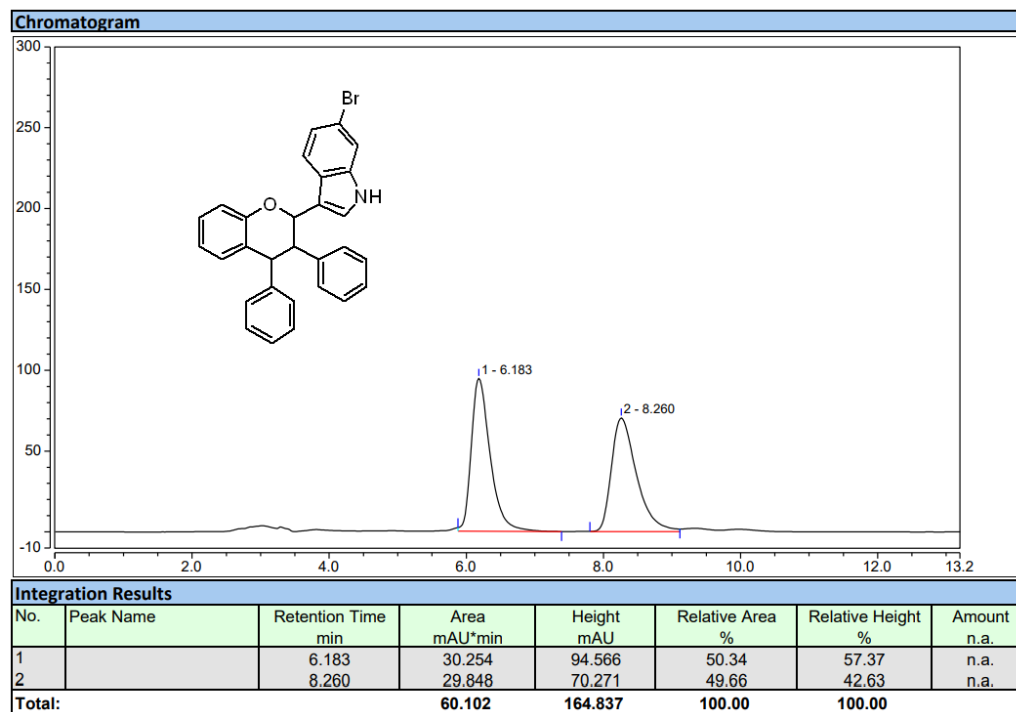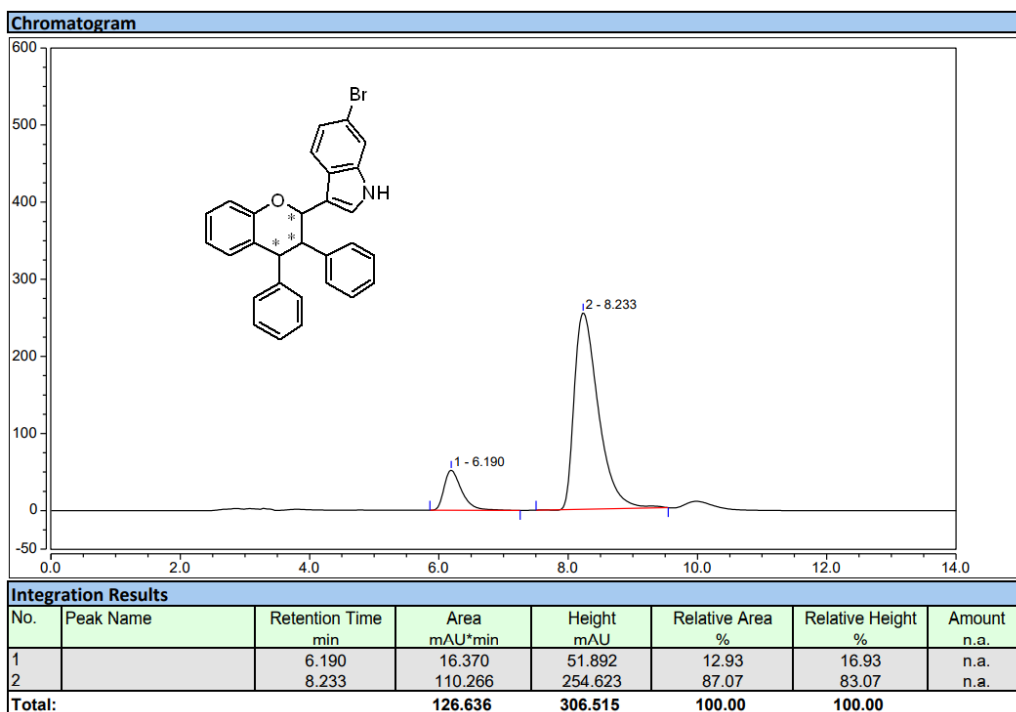

6ea:

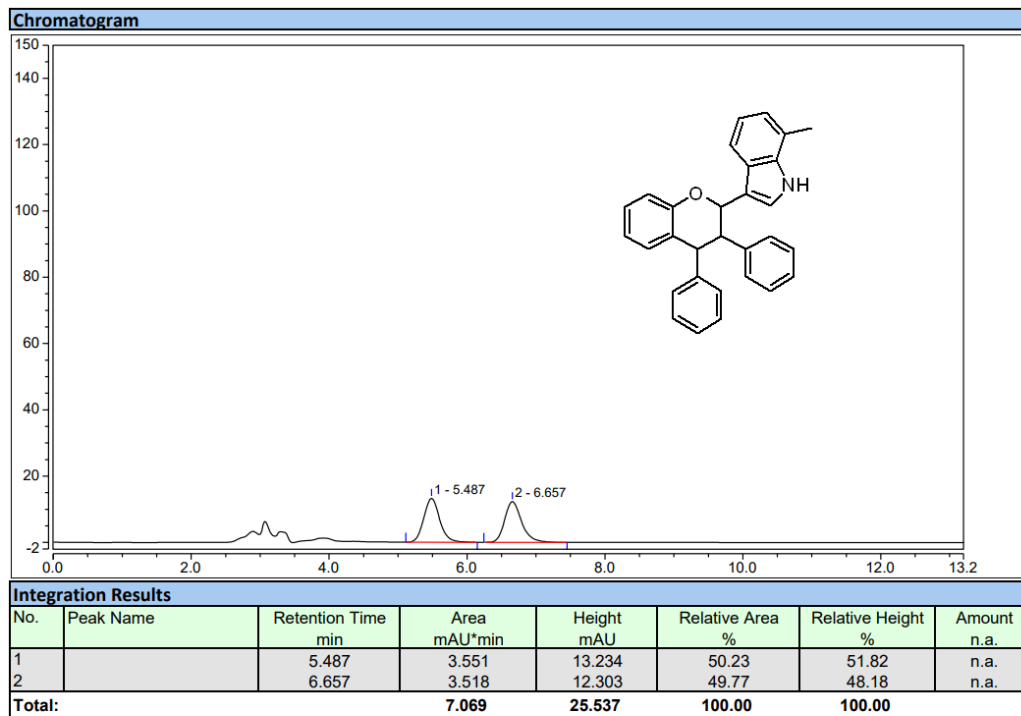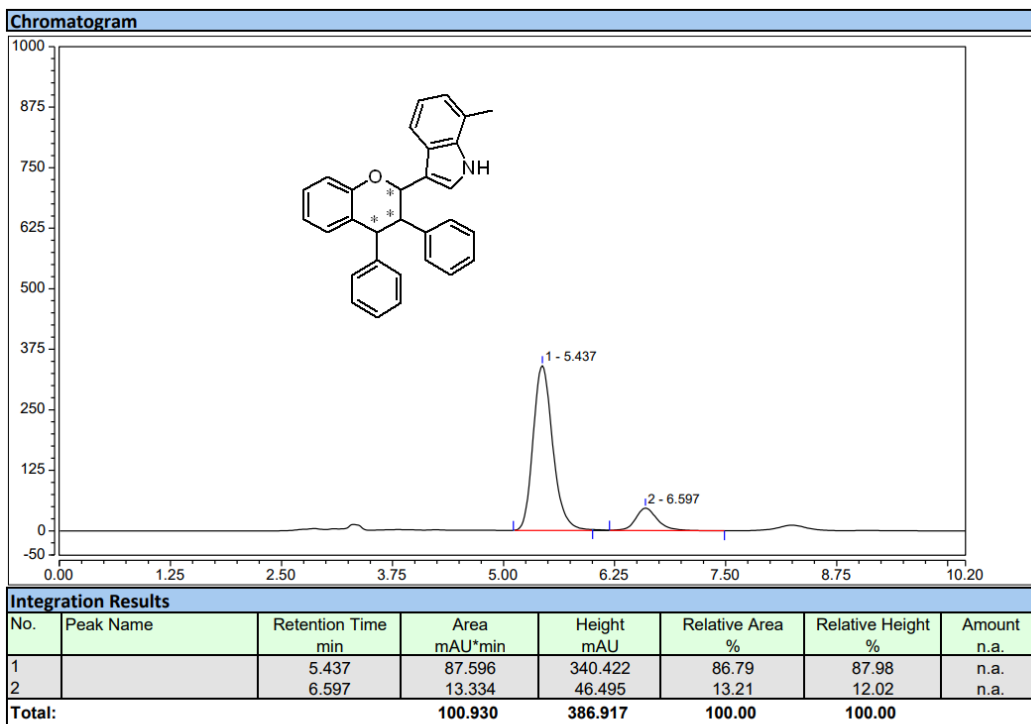

6qa:

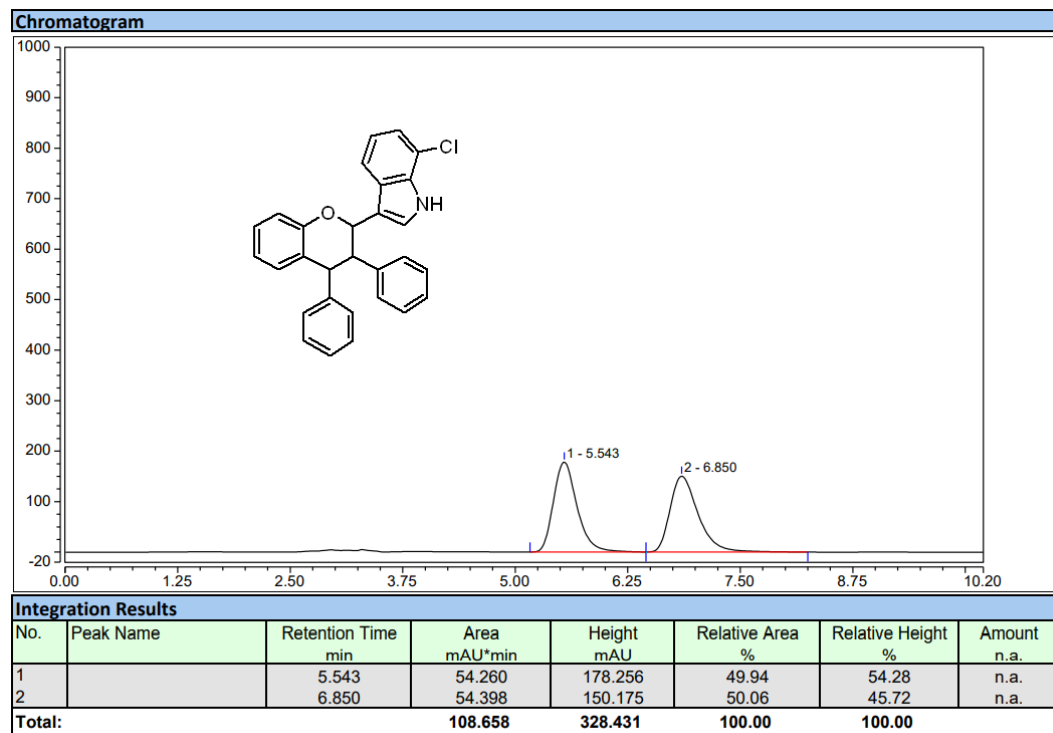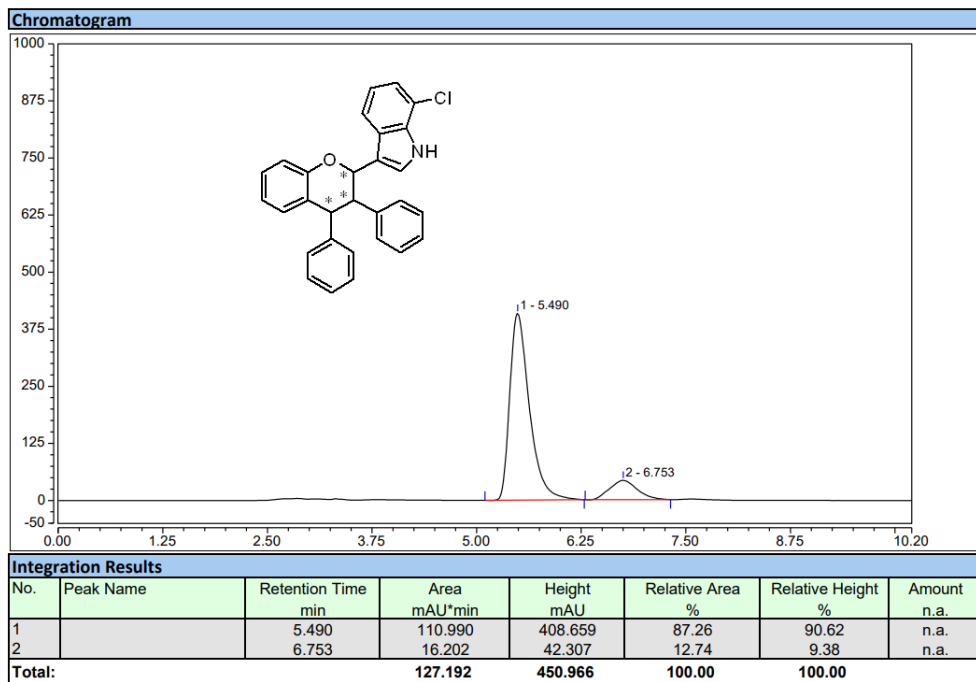

6ra:

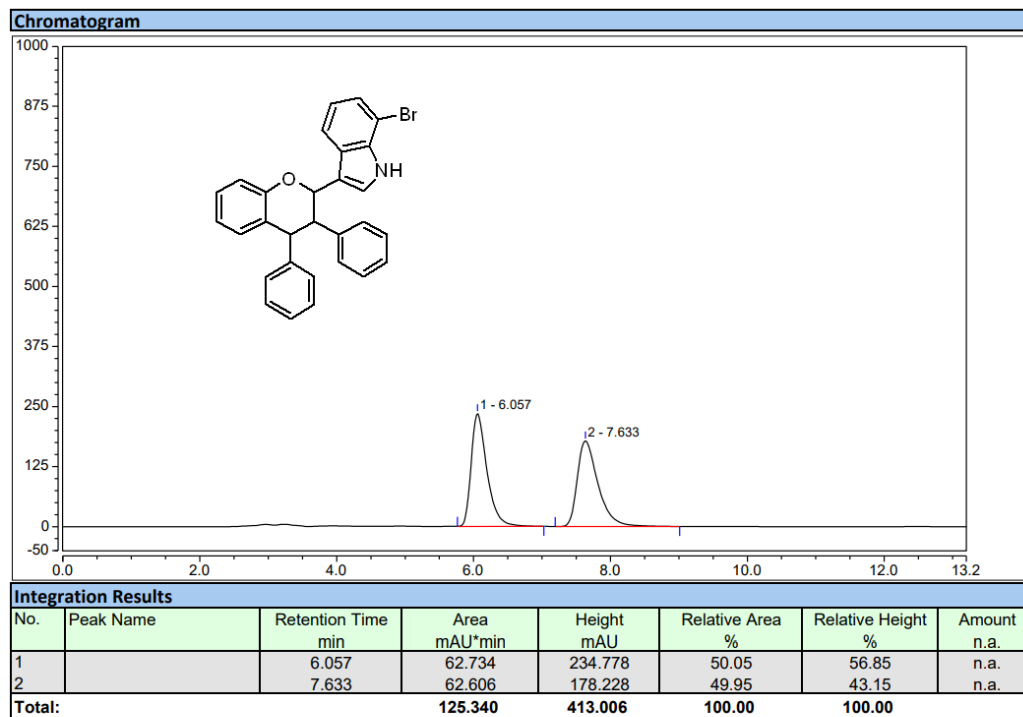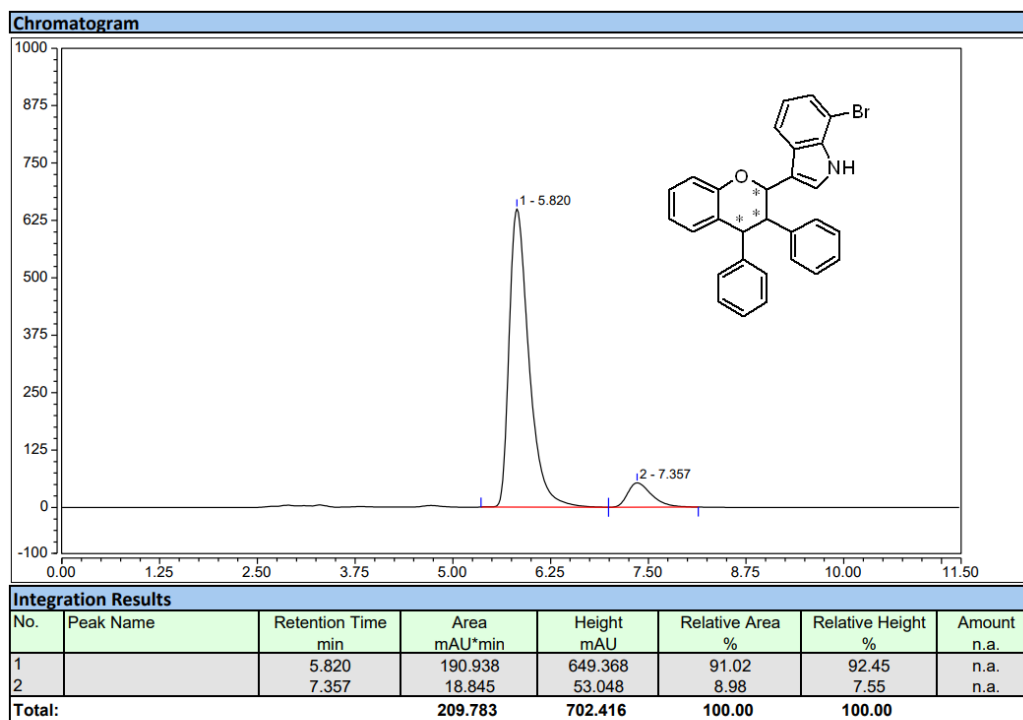



6ka:

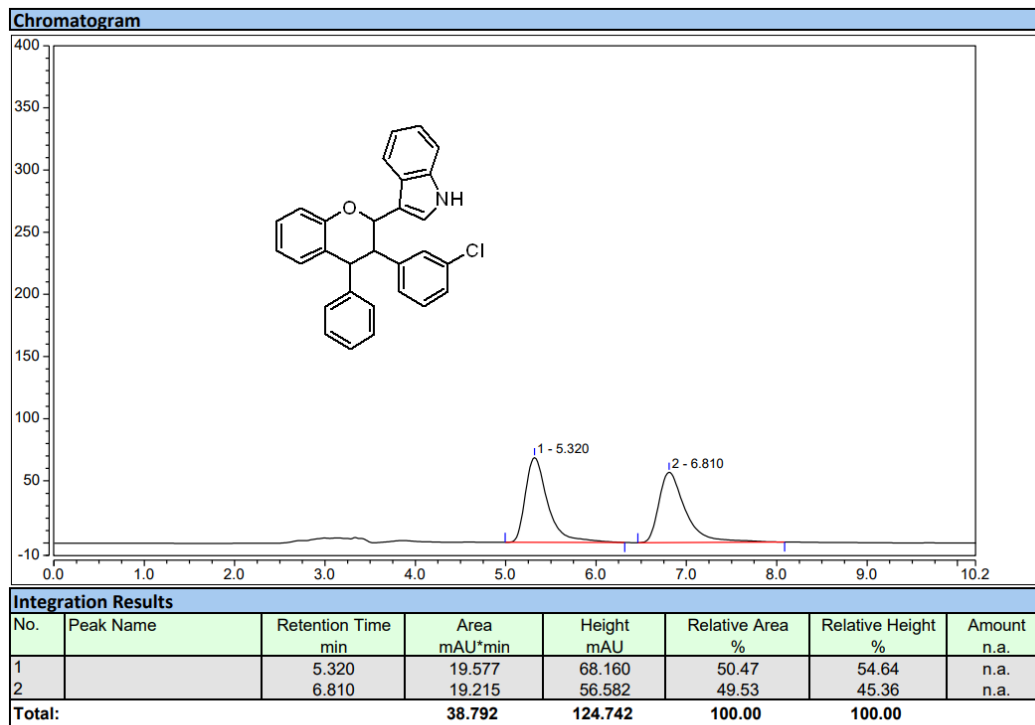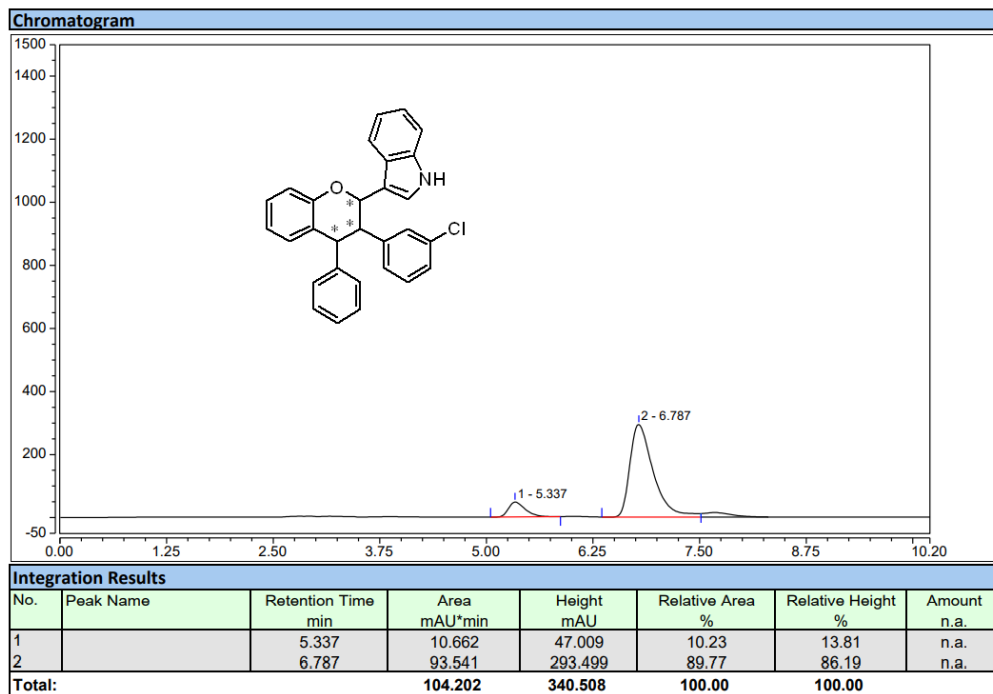

6ma:

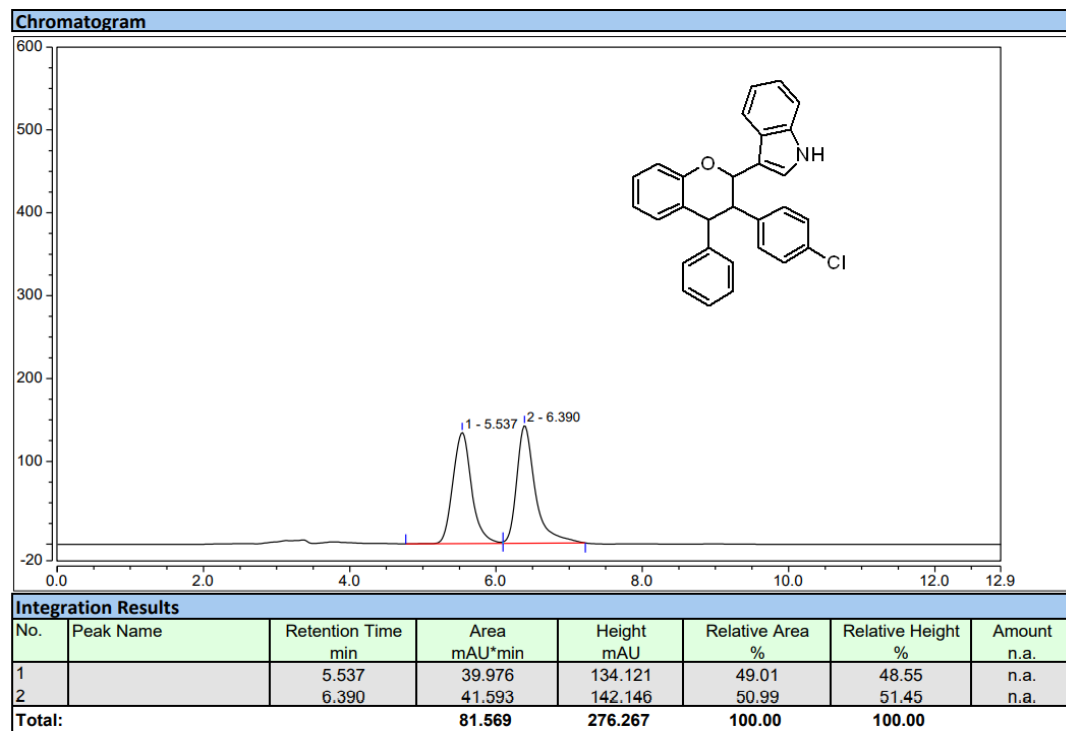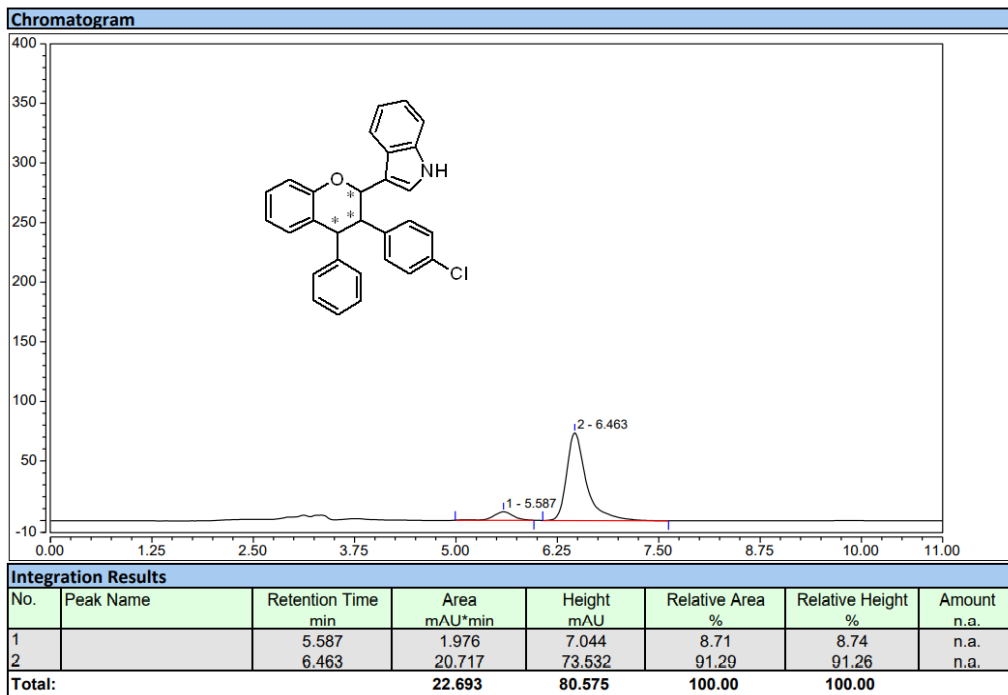

6ab:

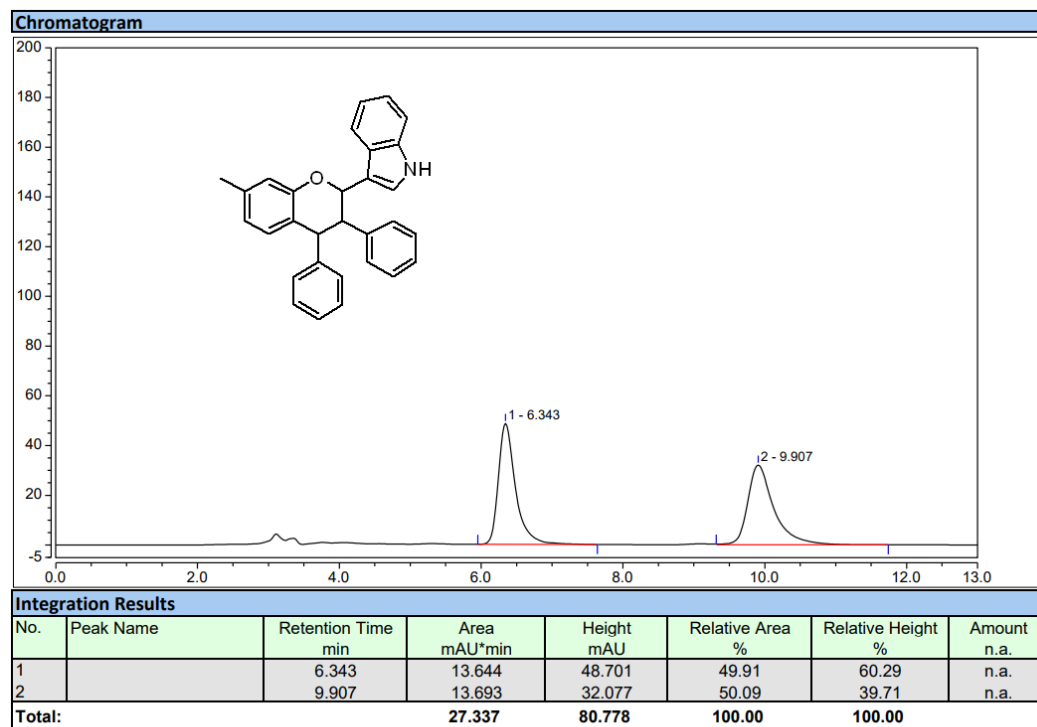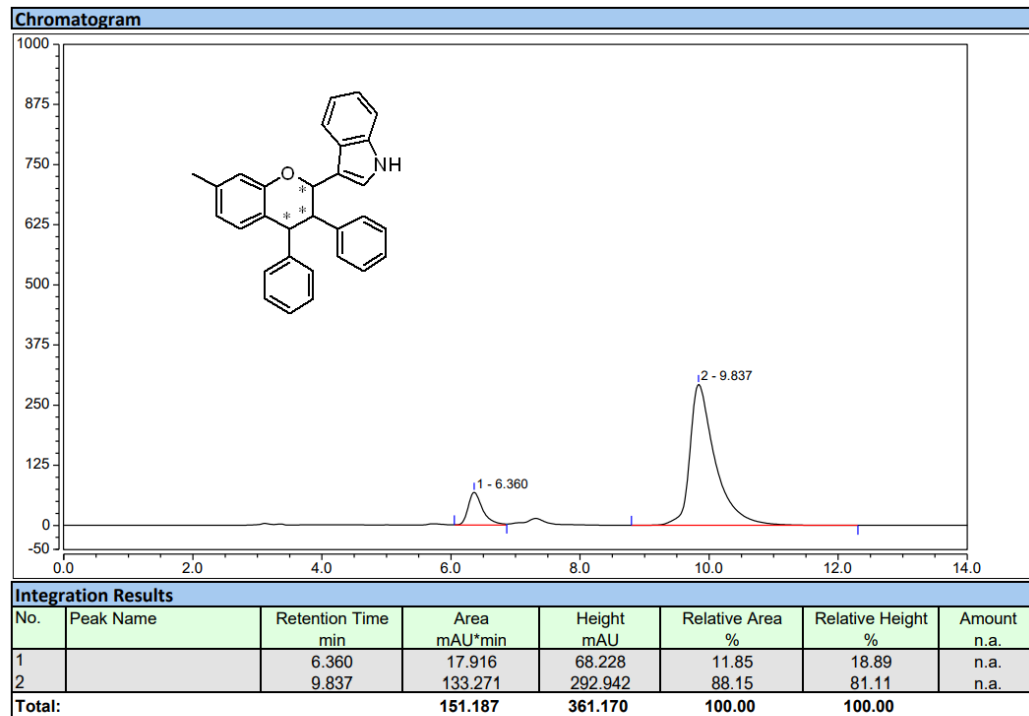

**6ac** (major diastereoisomer):

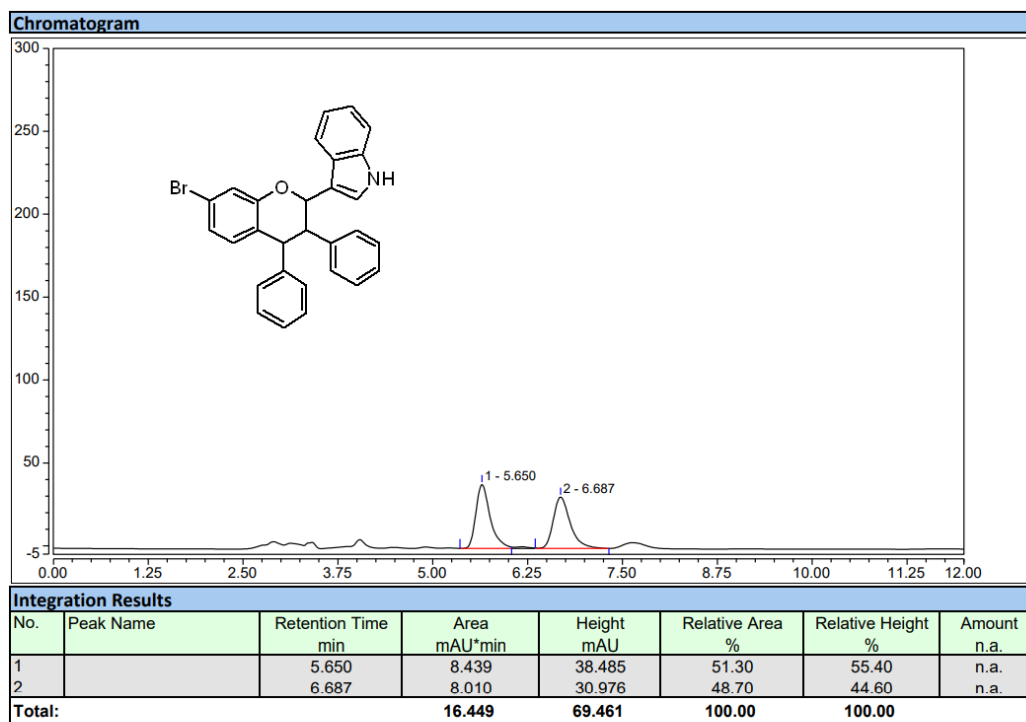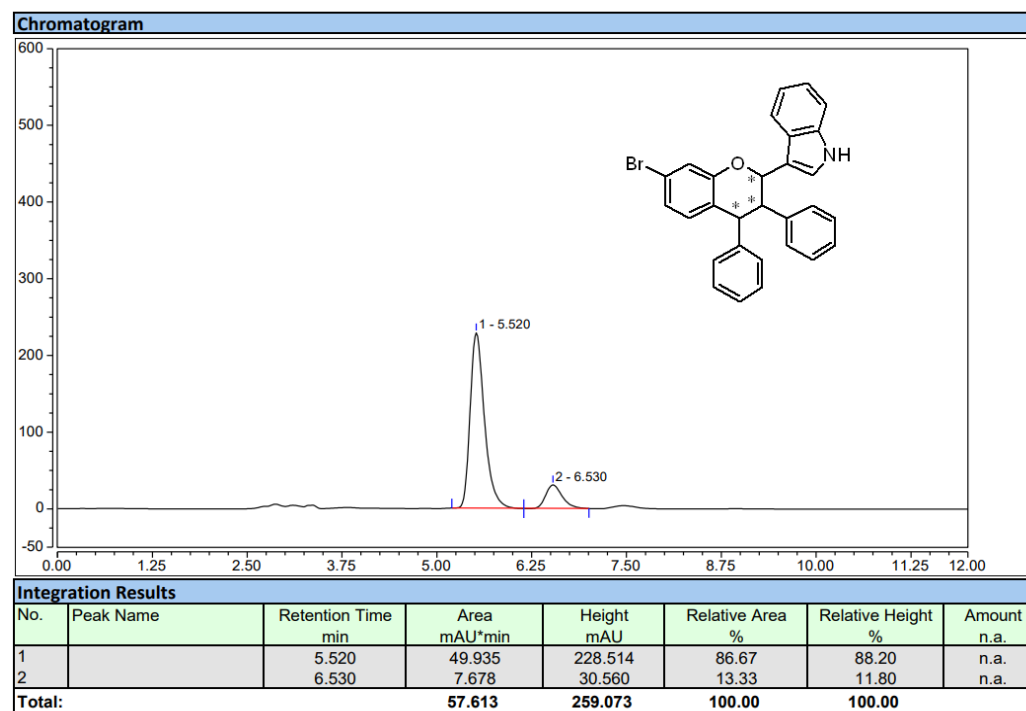

**6ac** (minor diastereoisomer):

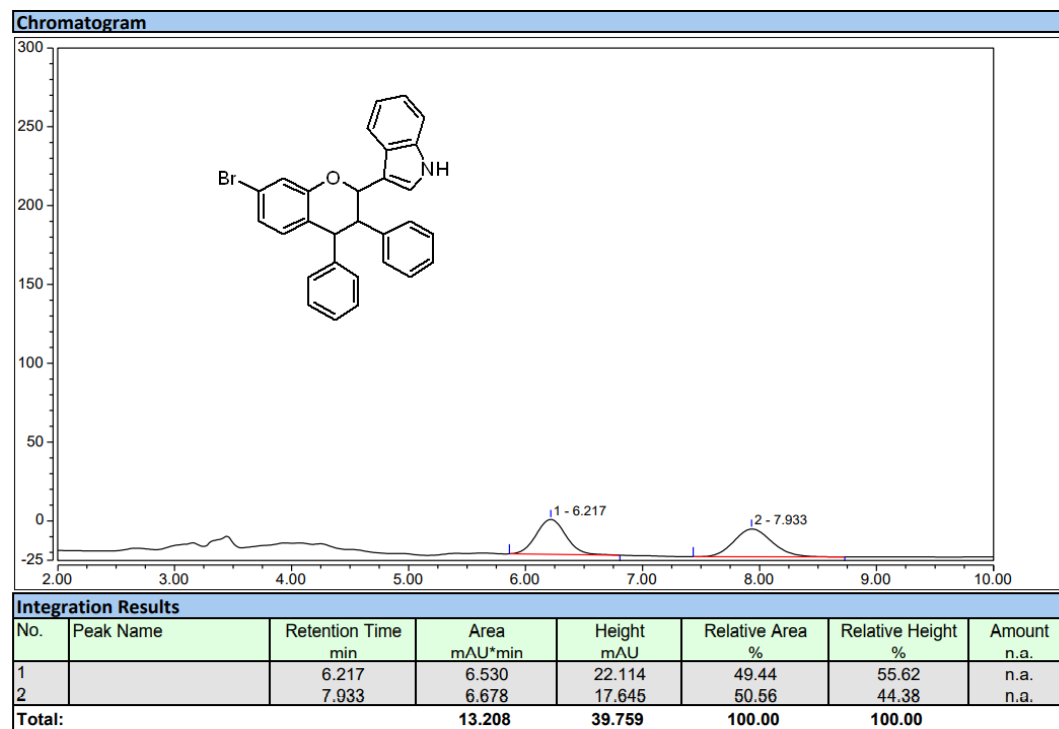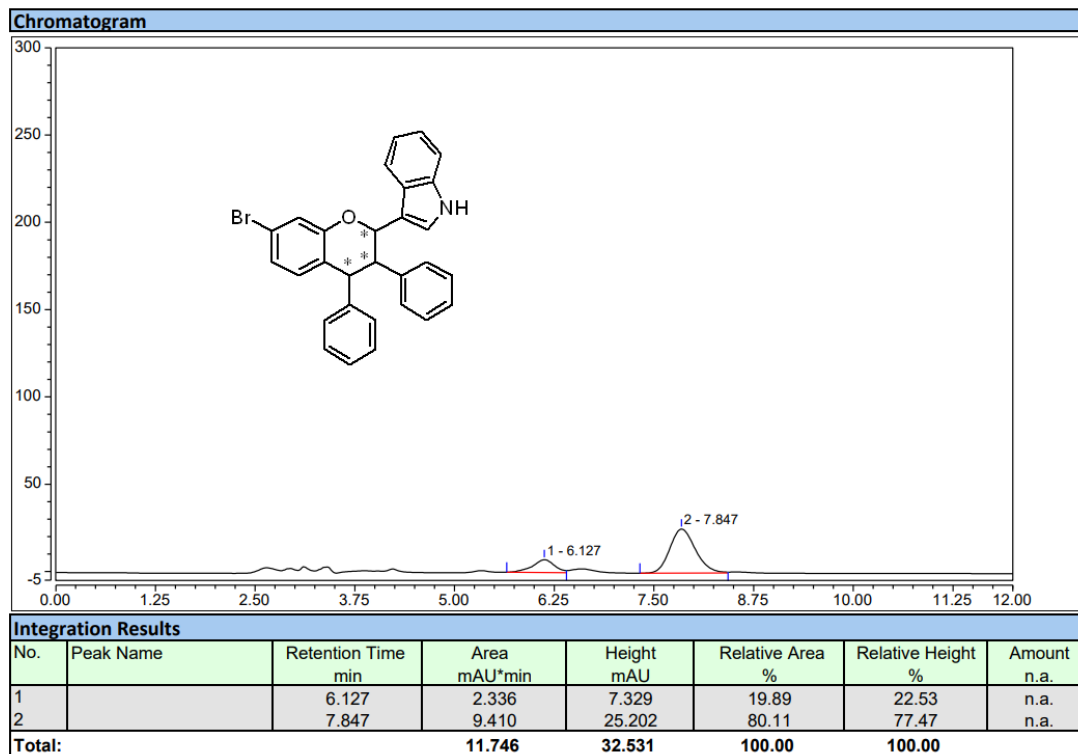

6ad:

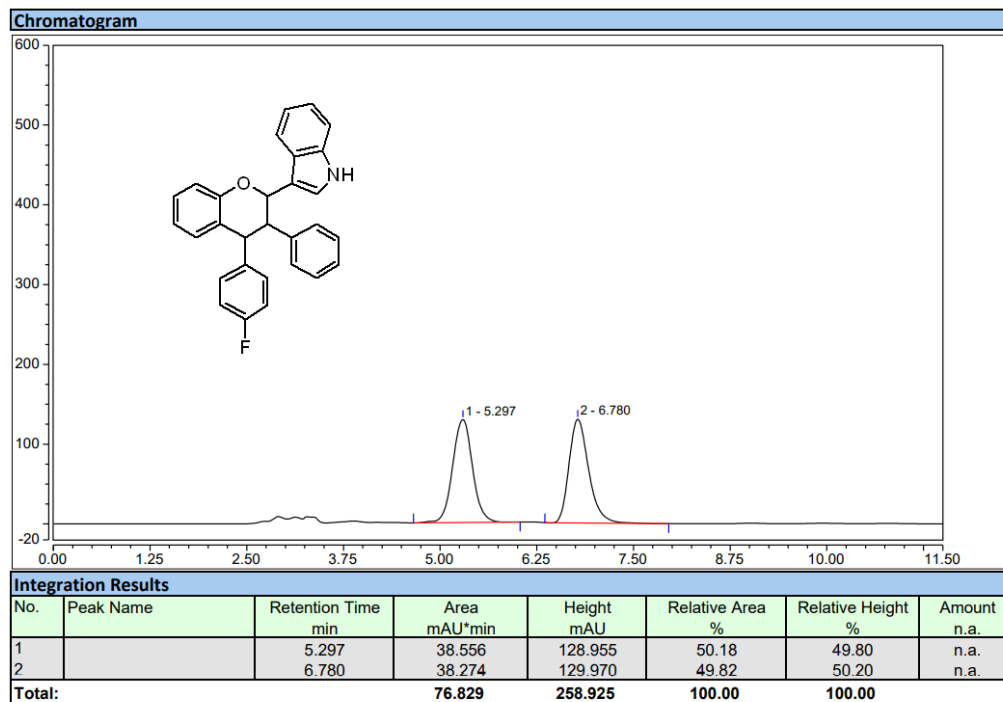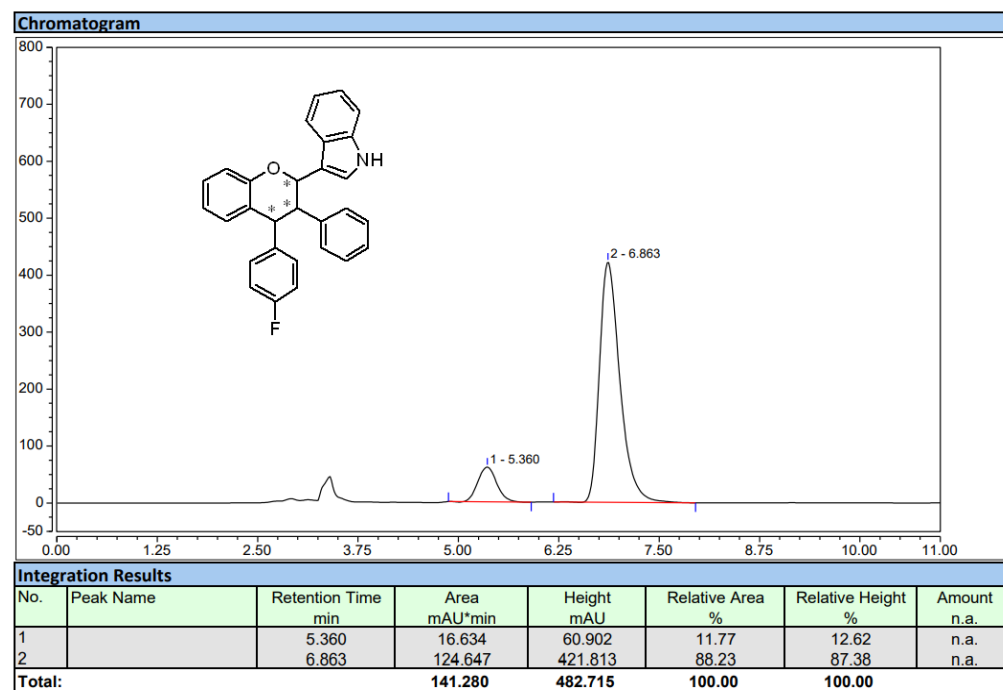

6ae:

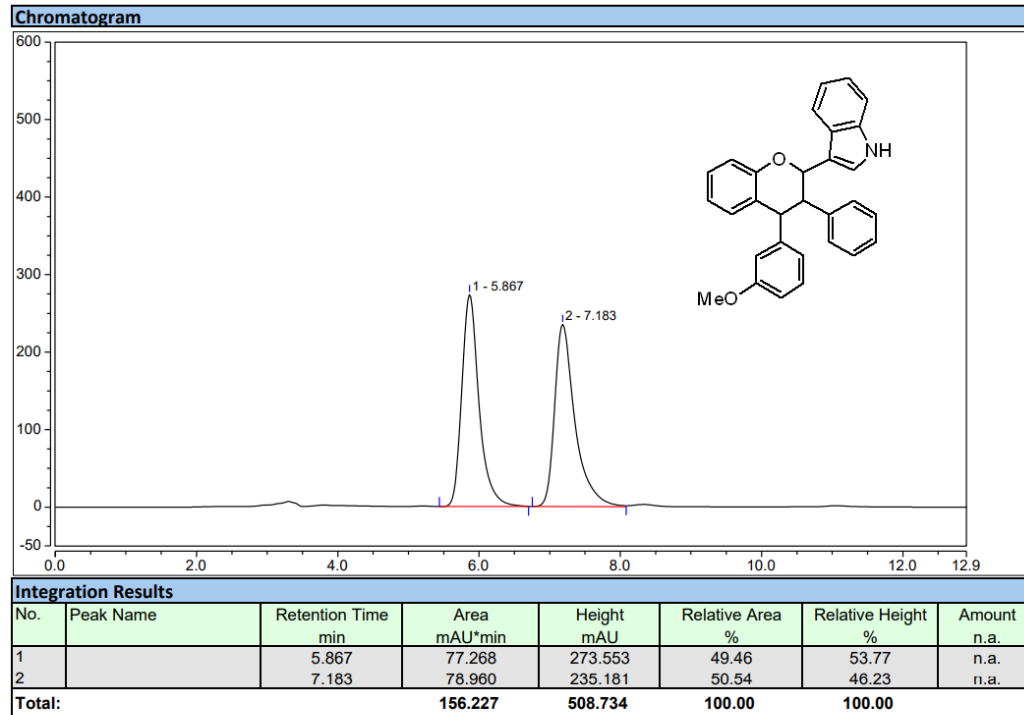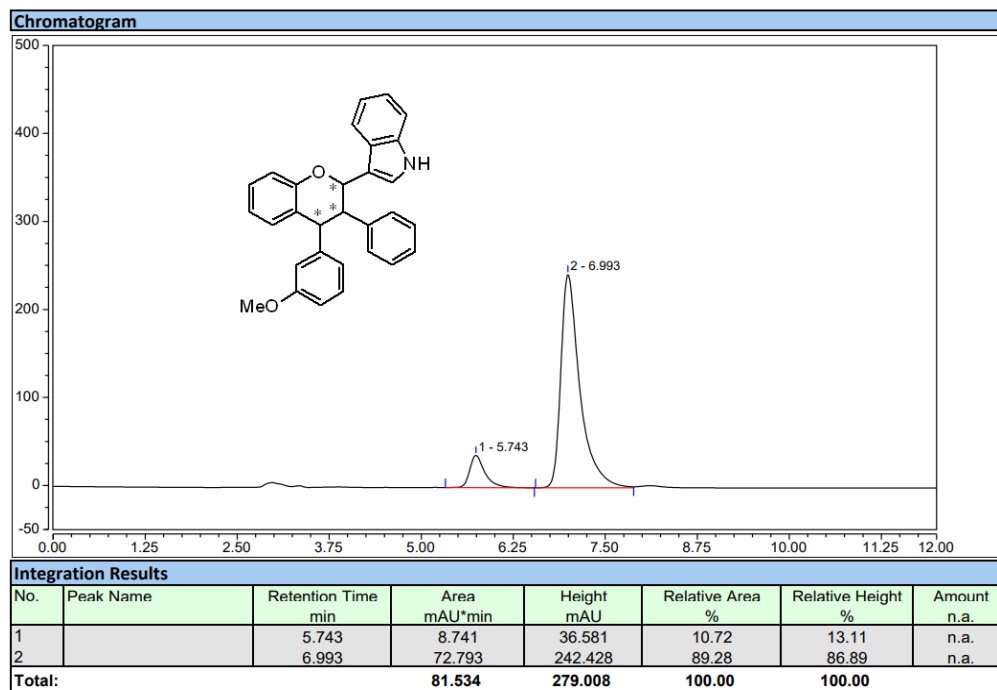

6af:

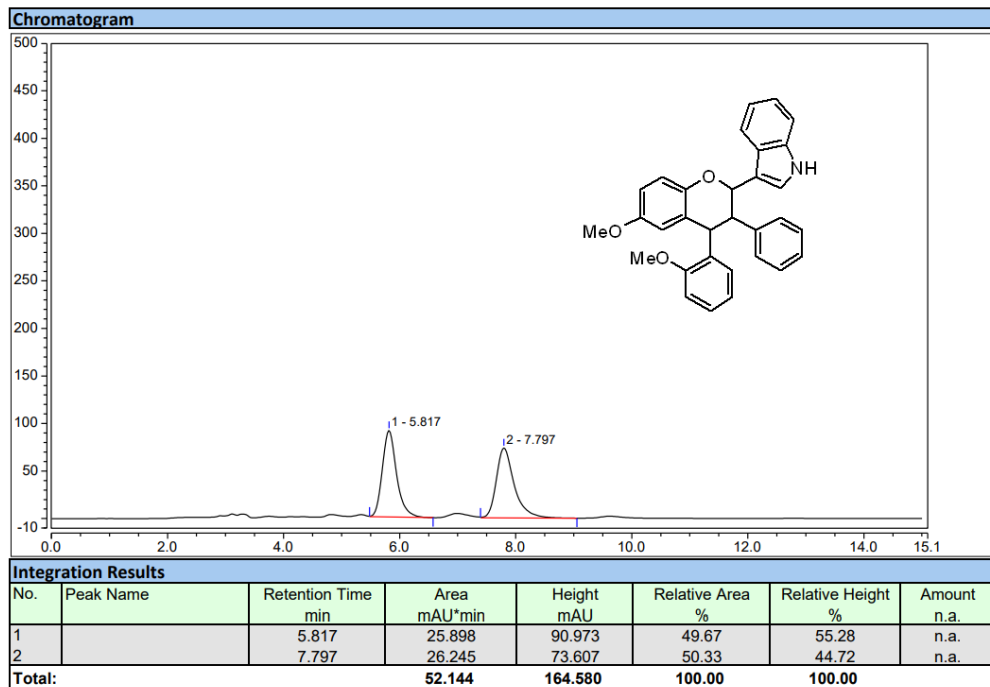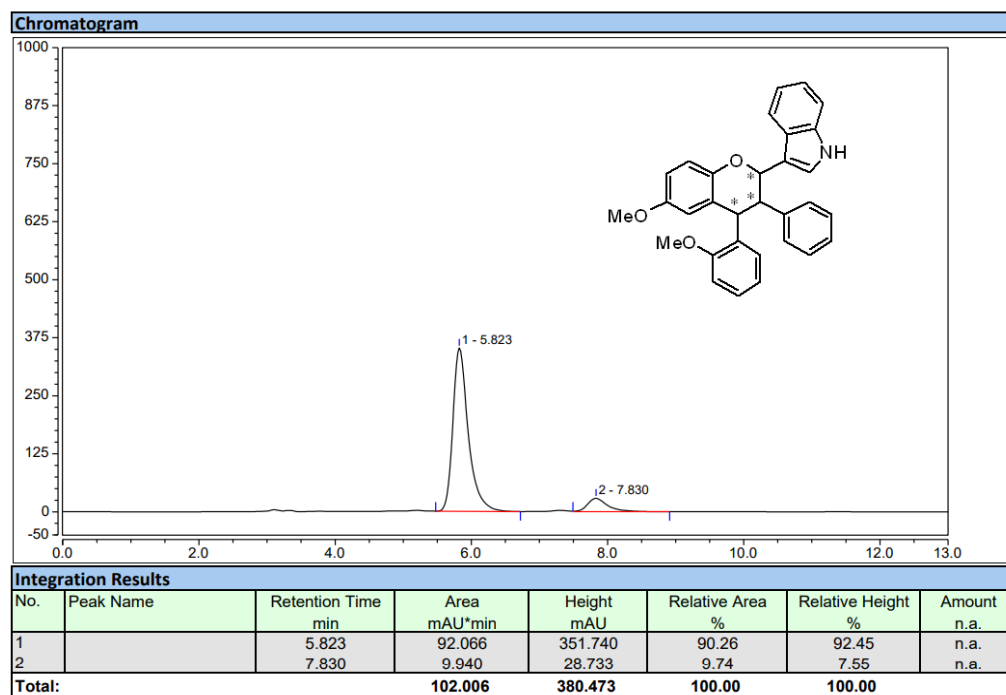



## 5. NOE spectrum of product 6ma

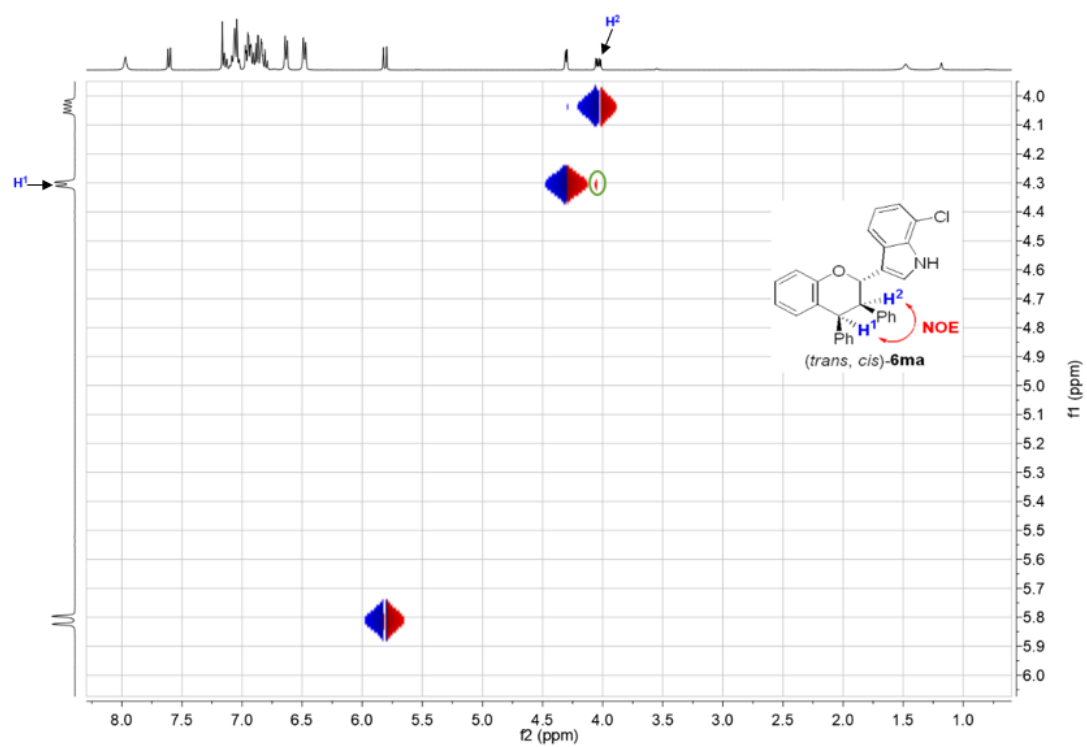

## 6. X-ray single-crystal data for product **3na**

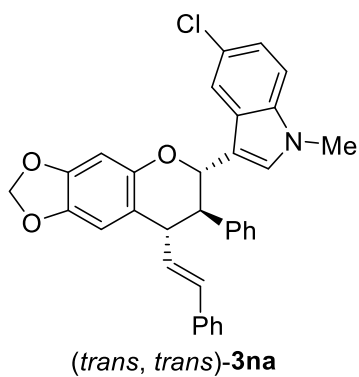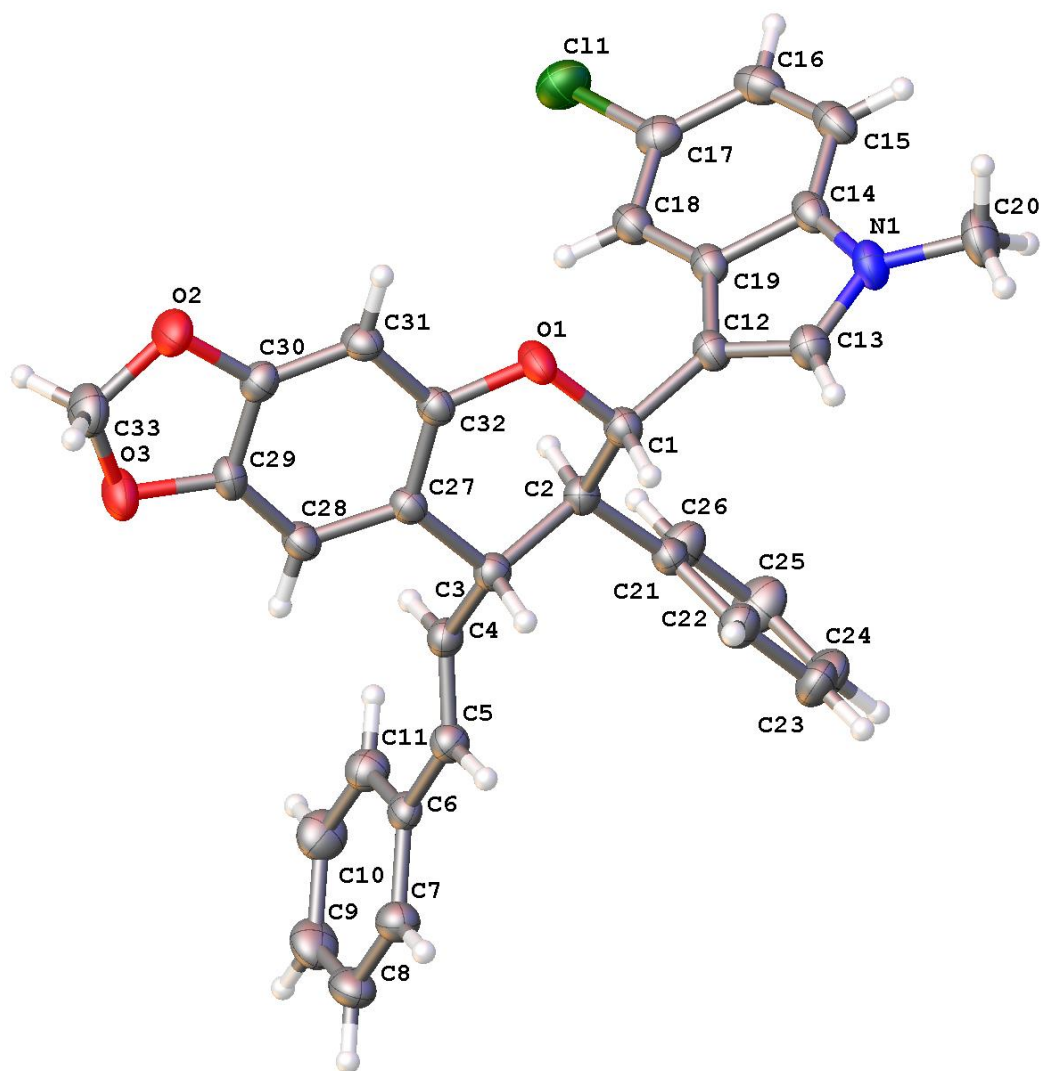

The X-ray source used for the single crystal X-ray diffraction analysis of compound **3na** was MoK $\alpha$  ( $\lambda = 0.71073$ ), and the thermal ellipsoid was drawn at the 30% probability level.

|                                             |                                                                      |
|---------------------------------------------|----------------------------------------------------------------------|
| Empirical formula                           | C <sub>33</sub> H <sub>26</sub> ClNO <sub>3</sub>                    |
| Formula weight                              | 520.00                                                               |
| Temperature/K                               | 296.15                                                               |
| Crystal system                              | triclinic                                                            |
| Space group                                 | P-1                                                                  |
| a/Å                                         | 8.5541(14)                                                           |
| b/Å                                         | 12.401(2)                                                            |
| c/Å                                         | 15.137(2)                                                            |
| $\alpha$ /°                                 | 68.756(2)                                                            |
| $\beta$ /°                                  | 75.804(2)                                                            |
| $\gamma$ /°                                 | 88.195(2)                                                            |
| Volume/Å <sup>3</sup>                       | 1448.0(4)                                                            |
| Z                                           | 2                                                                    |
| $\rho_{\text{calc}}$ /cm <sup>3</sup>       | 1.193                                                                |
| $\mu$ /mm <sup>-1</sup>                     | 0.164                                                                |
| F(000)                                      | 544.0                                                                |
| Radiation                                   | MoK $\alpha$ ( $\lambda$ = 0.71073)                                  |
| 2 $\Theta$ range for data collection/°      | 5.392 to 51.362                                                      |
| Index ranges                                | -10 $\leq$ h $\leq$ 9, -6 $\leq$ k $\leq$ 15, -17 $\leq$ l $\leq$ 18 |
| Reflections collected                       | 7706                                                                 |
| Independent reflections                     | 5390 [ $R_{\text{int}}$ = 0.0154, $R_{\text{sigma}}$ = 0.0352]       |
| Data/restraints/parameters                  | 5390/0/344                                                           |
| Goodness-of-fit on F <sup>2</sup>           | 1.058                                                                |
| Final R indexes [ $I \geq 2\sigma(I)$ ]     | $R_1$ = 0.0470, $wR_2$ = 0.1217                                      |
| Final R indexes [all data]                  | $R_1$ = 0.0689, $wR_2$ = 0.1344                                      |
| Largest diff. peak/hole / e Å <sup>-3</sup> | 0.23/-0.25                                                           |

## 7. Theoretical calculations of the reaction pathway

### Computational details:

All calculations were performed using Gaussian 16, Revision A.03 package.<sup>1</sup> All of the reactants, intermediates, transition states and products were optimized by the DFT with the B3LYP functional. For geometry optimizations and frequency calculations, BS-I basis set system was employed. In BS-I, we employed 6-31G(d) basis sets for H, C, O, N, P, and Cl. All the stationary structures were characterized with no imaginary frequency and the transition state structures (TSs) were characterized with a single imaginary frequency. Intrinsic reaction coordinate (IRC) calculations were performed on all the TSs. The solvent effect in toluene was evaluated by B3LYP-D3 functional through the SMD<sup>2</sup> model, in which a better basis system BS-II was used. In BS-II, we employed 6-311++G(d,p) basis sets for the atoms. All the 3D molecular structures of the species were generated by using the CYLview program.<sup>3</sup>

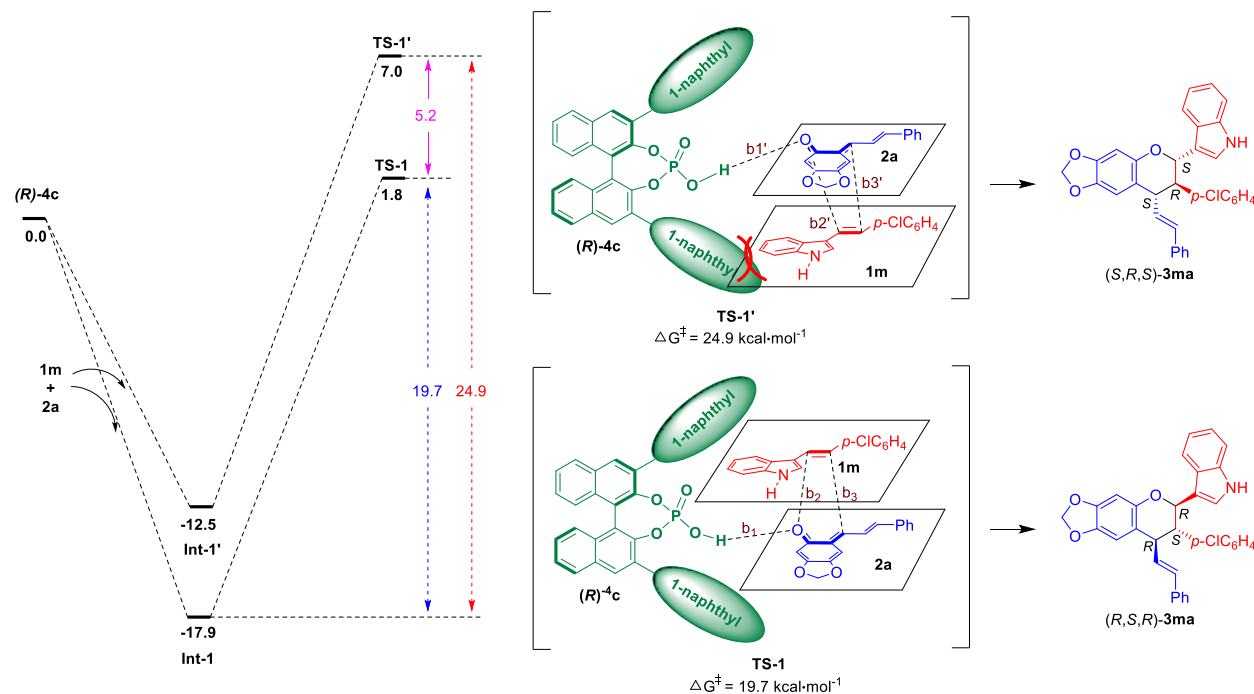

**Figure S1.** DFT calculated Gibbs free energy profiles for the cyclization process (in kcal/mol).

<sup>1</sup> Gaussian 16, Revision A.03, M. J. Frisch, G. W. Trucks, H. B. Schlegel, G. E. Scuseria, M. A. Robb, J. R. Cheeseman, G. Scalmani, V. Barone, G. A. Petersson, H. Nakatsuji, X. Li, M. Caricato, A. V. Marenich, J. Bloino, B. G. Janesko, R. Gomperts, B. Mennucci, H. P. Hratchian, J. V. Ortiz, A. F. Izmaylov, J. L. Sonnenberg, D. Williams-Young, F. Ding, F. Lipparini, F. Egidi, J. Goings, B. Peng, A. Petrone, T. Henderson, D. Ranasinghe, V. G. Zakrzewski, J. Gao, N. Rega, G. Zheng, W. Liang, M. Hada, M. Ehara, K. Toyota, R. Fukuda, J. Hasegawa, M. Ishida, T. Nakajima, Y. Honda, O. Kitao, H. Nakai, T. Vreven, K. Throssell, J. A. Montgomery, Jr., J. E. Peralta, F. Ogliaro, M. J. Bearpark, J. J. Heyd, E. N. Brothers, K. N. Kudin, V. N. Staroverov, T. A. Keith, R. Kobayashi, J. Normand, K. Raghavachari, A. P. Rendell, J. C. Burant, S. S. Iyengar, J. Tomasi, M. Cossi, J. M. Millam, M. Klene, C. Adamo, R. Cammi, J. W. Ochterski, R. L. Martin, K. Morokuma, O. Farkas, J. B. Foresman, and D. J. Fox, Gaussian, Inc., Wallingford CT, 2016.

<sup>2</sup> A. V. Marenich, C. J. Cramer, D. G. Truhlar, *J. Phys. Chem. B* **2009**, *113*, 6378.

<sup>3</sup> CYLview, 1.0b; C. Y. Legault, Universit   Sherbrooke, **2009** (<http://www.cylview.org>).

**Cartesian coordinates of the optimized structures:**

**(R)-4c**

E = -2181.658653 a.u.

|   |             |             |             |
|---|-------------|-------------|-------------|
| C | 0.67715700  | 1.96227100  | -0.32689600 |
| C | 1.44491600  | 0.83662800  | -0.06797600 |
| C | 2.80727600  | 0.70094300  | -0.45641000 |
| C | 3.36456200  | 1.74101400  | -1.17432300 |
| C | 2.61578100  | 2.88317200  | -1.55269000 |
| C | 1.24791400  | 3.00050800  | -1.14117400 |
| C | -0.71586900 | 2.04262300  | 0.20276600  |
| C | -1.61505000 | 1.02679800  | -0.08019900 |
| C | -2.97633800 | 1.03900500  | 0.33348500  |
| C | -3.40096500 | 2.11041900  | 1.09165300  |
| C | -2.51928800 | 3.14988900  | 1.48359000  |
| C | -1.15222000 | 3.11759500  | 1.05378100  |
| H | 4.40738300  | 1.67764200  | -1.47321000 |
| H | -4.43769400 | 2.15212200  | 1.41511900  |
| C | 3.19544300  | 3.90843000  | -2.34939000 |
| C | 2.45396000  | 4.99343800  | -2.75524200 |
| C | 1.09190000  | 5.09234300  | -2.38373000 |
| C | 0.50516400  | 4.12460400  | -1.59820700 |
| C | -0.27721500 | 4.13236200  | 1.53189000  |
| C | -0.73679100 | 5.13880000  | 2.35304400  |
| C | -2.09606900 | 5.18980300  | 2.74236100  |
| C | -2.96462100 | 4.21121000  | 2.31765000  |
| O | 0.86832100  | -0.21915200 | 0.64491500  |
| O | -1.18818200 | -0.06840200 | -0.83040100 |
| P | -0.19276600 | -1.15758200 | -0.14484900 |
| O | 0.28586800  | -2.14595300 | -1.12455600 |
| O | -0.95664300 | -1.73850100 | 1.14906700  |
| H | -1.33616600 | -2.60918600 | 0.94274400  |
| C | 3.62042100  | -0.48649800 | -0.06079300 |
| C | 4.22528800  | -1.34031000 | -1.04370300 |
| C | 3.83315500  | -0.73809700 | 1.28374100  |
| C | 4.00578800  | -1.19550100 | -2.44230500 |
| C | 5.07378900  | -2.41068400 | -0.59909100 |
| C | 4.65865600  | -1.80029300 | 1.71401200  |
| C | 4.61133000  | -2.03653400 | -3.34919600 |
| H | 3.33447000  | -0.41975000 | -2.79323800 |

|   |             |             |             |
|---|-------------|-------------|-------------|
| C | 5.68901200  | -3.25462700 | -1.56350700 |
| C | 5.27499400  | -2.61304900 | 0.79140900  |
| C | 5.46989200  | -3.07203900 | -2.90917900 |
| H | 4.42053500  | -1.91070000 | -4.41153200 |
| H | 6.33427800  | -4.05700900 | -1.21316200 |
| H | 5.91999400  | -3.42725800 | 1.11345200  |
| H | 5.94382500  | -3.72709700 | -3.63524300 |
| C | -3.90434100 | -0.08648800 | 0.01454900  |
| C | -4.37262100 | -0.87286400 | 1.05301300  |
| C | -4.34441800 | -0.34997200 | -1.32530200 |
| C | -5.26577200 | -1.94536200 | 0.82146100  |
| C | -5.24883500 | -1.44055600 | -1.55455900 |
| C | -3.94071900 | 0.43640300  | -2.43877500 |
| C | -5.69051800 | -2.22579500 | -0.45599500 |
| C | -5.69178300 | -1.70602000 | -2.87882500 |
| H | -3.26844600 | 1.27261600  | -2.27844500 |
| C | -4.39102800 | 0.15399300  | -3.70910700 |
| H | -6.37443700 | -3.05013400 | -0.64401400 |
| C | -5.27293700 | -0.92983100 | -3.93485300 |
| H | -6.37403300 | -2.53721400 | -3.04130700 |
| H | -4.06689400 | 0.76685800  | -4.54572800 |
| H | -5.61895300 | -1.14387000 | -4.94238900 |
| H | -4.03041400 | -0.66911600 | 2.06360500  |
| H | -5.60978900 | -2.54515500 | 1.65978800  |
| H | 3.36622600  | -0.09507600 | 2.02395900  |
| H | 4.80925800  | -1.96222500 | 2.77779400  |
| H | 4.23764700  | 3.80913500  | -2.64287700 |
| H | 2.90547700  | 5.76735100  | -3.36965200 |
| H | 0.50102600  | 5.93756900  | -2.72593900 |
| H | -0.54148500 | 4.21125100  | -1.33081500 |
| H | 0.76925700  | 4.10379500  | 1.25219500  |
| H | -0.04619000 | 5.89807700  | 2.70970100  |
| H | -2.44618600 | 5.99297300  | 3.38472600  |
| H | -4.00773000 | 4.22604500  | 2.62422400  |

**1**

E = -1131.858465 a.u.

|   |             |            |             |
|---|-------------|------------|-------------|
| C | -1.31793200 | 0.33285900 | 0.01788000  |
| C | -2.72444000 | 0.32320800 | -0.17681800 |

|    |             |             |             |
|----|-------------|-------------|-------------|
| C  | -3.50076900 | 1.48508400  | -0.12172100 |
| C  | -2.84245900 | 2.68226900  | 0.13540800  |
| C  | -1.44622800 | 2.71873100  | 0.32991000  |
| C  | -0.68170900 | 1.55969800  | 0.27138100  |
| C  | -0.85152000 | -1.03496200 | -0.10998500 |
| C  | -1.97808600 | -1.79577500 | -0.36624400 |
| H  | -4.57655300 | 1.45492500  | -0.27396400 |
| H  | -3.41356400 | 3.60506500  | 0.18616500  |
| H  | -0.96242000 | 3.67140500  | 0.52676700  |
| H  | 0.39417600  | 1.60632800  | 0.41844200  |
| H  | -2.07305500 | -2.86319000 | -0.50780800 |
| N  | -3.09163700 | -0.98904900 | -0.41136700 |
| H  | -4.03414300 | -1.31278700 | -0.56408700 |
| C  | 0.52498100  | -1.47527600 | 0.01955200  |
| H  | 1.21383000  | -0.71191700 | 0.37758900  |
| C  | 1.00884000  | -2.70512300 | -0.26342500 |
| H  | 0.32340200  | -3.45351200 | -0.66131200 |
| C  | 2.38979200  | -3.16564800 | -0.11294800 |
| C  | 3.40953600  | -2.39767100 | 0.48581800  |
| C  | 2.73833800  | -4.44612300 | -0.58463900 |
| C  | 4.71028300  | -2.87661300 | 0.59674900  |
| H  | 3.18545000  | -1.41169400 | 0.88129100  |
| C  | 4.03572300  | -4.94180500 | -0.47951000 |
| H  | 1.97390900  | -5.06509800 | -1.04827400 |
| C  | 5.01794100  | -4.14941000 | 0.11119700  |
| H  | 5.48244900  | -2.27234700 | 1.06140200  |
| H  | 4.28298400  | -5.93058300 | -0.85139500 |
| Cl | 6.66150200  | -4.75931200 | 0.25404000  |

## 2a

E = -842.531225 a.u.

|   |             |            |             |
|---|-------------|------------|-------------|
| C | -5.80632300 | 2.09823300 | -0.60560900 |
| C | -7.18347100 | 2.35100600 | -0.26337500 |
| C | -7.61339000 | 3.50212600 | 0.29689800  |
| C | -6.62508800 | 4.55024800 | 0.57129700  |
| C | -4.82220300 | 2.99653900 | -0.39370200 |
| C | -7.02570200 | 0.29082800 | -1.16059800 |
| H | -8.64941900 | 3.68796600 | 0.55243400  |
| H | -3.79738500 | 2.77000800 | -0.66469400 |

|   |             |             |             |
|---|-------------|-------------|-------------|
| H | -7.04577500 | -0.61732900 | -0.54815600 |
| H | -7.32716900 | 0.07499600  | -2.19146600 |
| O | -7.91942400 | 1.25647700  | -0.60073500 |
| O | -5.71332500 | 0.84573400  | -1.15159700 |
| O | -6.95957500 | 5.62240800  | 1.08175800  |
| C | -5.18135000 | 4.26635800  | 0.20481300  |
| C | -4.28314200 | 5.26850700  | 0.47560200  |
| H | -4.71308500 | 6.16141700  | 0.92661500  |
| C | -2.87263400 | 5.27040000  | 0.23597700  |
| H | -2.42082300 | 4.38909700  | -0.21343500 |
| C | -2.08987200 | 6.33677100  | 0.55302300  |
| H | -2.58346900 | 7.19921300  | 1.00124500  |
| C | -0.65060900 | 6.47712900  | 0.36695600  |
| C | 0.16291300  | 5.47026800  | -0.19489700 |
| C | -0.03115800 | 7.67867600  | 0.76661500  |
| C | 1.53161500  | 5.66215500  | -0.34750700 |
| H | -0.27944200 | 4.53133900  | -0.51402900 |
| C | 1.33979000  | 7.87029900  | 0.61347500  |
| H | -0.64142500 | 8.46650600  | 1.20183200  |
| C | 2.12820400  | 6.86221900  | 0.05526400  |
| H | 2.13934200  | 4.87329800  | -0.78263500 |
| H | 1.79277500  | 8.80598000  | 0.92965000  |
| H | 3.19803100  | 7.00760400  | -0.06594900 |

# Int1

E = -4156.084226 a.u.

|   |             |            |            |
|---|-------------|------------|------------|
| C | 1.95091700  | 7.39792800 | 2.81110100 |
| C | 2.34179900  | 6.29680600 | 3.55889600 |
| C | 3.69160600  | 5.85716300 | 3.66280800 |
| C | 4.64150300  | 6.54617000 | 2.93463000 |
| C | 4.30129800  | 7.62559900 | 2.08190200 |
| C | 2.93731800  | 8.05801100 | 2.00051200 |
| C | 0.52373300  | 7.83250900 | 2.83601200 |
| C | -0.47422800 | 6.92338500 | 2.51721200 |
| C | -1.85324700 | 7.26929800 | 2.44915300 |
| C | -2.20584500 | 8.56396600 | 2.76812700 |
| C | -1.24782300 | 9.52337800 | 3.18346900 |
| C | 0.13726500  | 9.15947200 | 3.23423100 |
| H | 5.68288000  | 6.24309000 | 3.00351900 |



|   |             |             |             |
|---|-------------|-------------|-------------|
| H | -3.25181400 | 8.85505100  | 2.71716200  |
| C | 5.28856300  | 8.27631000  | 1.29223000  |
| C | 4.94844300  | 9.29306100  | 0.43061800  |
| C | 3.59648200  | 9.69660100  | 0.31926200  |
| C | 2.61867900  | 9.09767900  | 1.08280000  |
| C | 1.06305800  | 10.12236900 | 3.72477000  |
| C | 0.64742300  | 11.37946600 | 4.10581200  |
| C | -0.71603600 | 11.74738900 | 4.01772200  |
| C | -1.64137600 | 10.83349400 | 3.56931400  |
| O | 1.37346800  | 5.59898400  | 4.27777600  |
| O | -0.12441000 | 5.60912000  | 2.21953100  |
| P | 0.36846200  | 4.62958600  | 3.43832600  |
| O | 0.94195300  | 3.38734300  | 2.87190700  |
| O | -0.79870000 | 4.51914400  | 4.49139300  |
| H | -1.44218600 | 3.76034200  | 4.26114800  |
| C | 4.08232900  | 4.73074200  | 4.56038900  |
| C | 4.69576900  | 3.54192100  | 4.04008700  |
| C | 3.89420100  | 4.85912900  | 5.92555200  |
| C | 4.85651200  | 3.29643300  | 2.64741300  |
| C | 5.14257600  | 2.53529300  | 4.96174100  |
| C | 4.32339800  | 3.85860900  | 6.82593200  |
| C | 5.44975600  | 2.13986500  | 2.19261500  |
| H | 4.48404600  | 4.02581100  | 1.93698100  |
| C | 5.76028200  | 1.35862300  | 4.45755400  |
| C | 4.94567900  | 2.72576400  | 6.35477100  |
| C | 5.91670800  | 1.16383400  | 3.10504100  |
| H | 5.54766100  | 1.96903900  | 1.12414000  |
| H | 6.09431800  | 0.60471900  | 5.16641000  |
| H | 5.28866300  | 1.95492300  | 7.04091200  |
| H | 6.38269500  | 0.25535700  | 2.73313100  |
| C | -2.90052100 | 6.27042100  | 2.07787200  |
| C | -3.75425800 | 5.79824200  | 3.05740100  |
| C | -3.06829800 | 5.83253500  | 0.72299300  |
| C | -4.78399900 | 4.87699700  | 2.75528600  |
| C | -4.11776000 | 4.90144900  | 0.42089000  |
| C | -2.25322100 | 6.30071800  | -0.34405500 |
| C | -4.96204500 | 4.43760800  | 1.46526500  |
| C | -4.29645500 | 4.47428700  | -0.92383100 |
| H | -1.46583000 | 7.01612800  | -0.12913000 |
| C | -2.45187600 | 5.86792200  | -1.63686600 |

|   |             |             |             |
|---|-------------|-------------|-------------|
| H | -5.75185100 | 3.72968200  | 1.22470400  |
| C | -3.48335000 | 4.94368700  | -1.93155400 |
| H | -5.09947100 | 3.77398500  | -1.14353200 |
| H | -1.81323900 | 6.23220000  | -2.43602600 |
| H | -3.63714200 | 4.61693500  | -2.95676300 |
| H | -3.61434200 | 6.12786500  | 4.08257500  |
| H | -5.42742200 | 4.51616600  | 3.55259400  |
| H | 3.41883700  | 5.75532100  | 6.31319500  |
| H | 4.16765400  | 3.99799500  | 7.89234500  |
| H | 6.32007800  | 7.94229900  | 1.37459600  |
| H | 5.71020300  | 9.77787300  | -0.17364200 |
| H | 3.32560200  | 10.48287700 | -0.38013100 |
| H | 1.58690600  | 9.41235700  | 0.97804900  |
| H | 2.10963800  | 9.85440200  | 3.80901700  |
| H | 1.37417100  | 12.09374900 | 4.48328000  |
| H | -1.02907800 | 12.74428400 | 4.31558700  |
| H | -2.69541100 | 11.09496900 | 3.51341600  |
| C | 2.08828900  | -0.81959300 | 3.59229900  |
| C | 2.36961500  | -2.14118700 | 4.03169200  |
| C | 2.54619600  | -2.46389100 | 5.38207100  |
| C | 2.43405900  | -1.42737900 | 6.30560700  |
| C | 2.15230100  | -0.10815100 | 5.89122900  |
| C | 1.98098800  | 0.20652400  | 4.54719200  |
| C | 1.98345000  | -0.85286200 | 2.14532200  |
| C | 2.19802900  | -2.17008500 | 1.78392100  |
| H | 2.77708400  | -3.47897900 | 5.69676400  |
| H | 2.57712700  | -1.63713000 | 7.36274100  |
| H | 2.08134700  | 0.67933800  | 6.63588300  |
| H | 1.77379200  | 1.22819200  | 4.24070500  |
| H | 2.20164300  | -2.62698800 | 0.80418600  |
| N | 2.42855900  | -2.93883400 | 2.90514900  |
| H | 2.61416700  | -3.92947400 | 2.89913700  |
| C | 1.71146800  | 0.29140600  | 1.29048800  |
| H | 1.50586500  | 1.22221300  | 1.81453300  |
| C | 1.70435300  | 0.27864000  | -0.06139300 |
| H | 1.93203500  | -0.65552800 | -0.57681800 |
| C | 1.42929500  | 1.40605800  | -0.95307800 |
| C | 1.07325100  | 2.69311300  | -0.49563300 |
| C | 1.52092100  | 1.20984700  | -2.34472900 |
| C | 0.82700000  | 3.73116100  | -1.38938900 |

|    |             |             |             |
|----|-------------|-------------|-------------|
| H  | 0.98651400  | 2.89674400  | 0.56760400  |
| C  | 1.27885800  | 2.24018700  | -3.25074400 |
| H  | 1.79035900  | 0.22718900  | -2.72538300 |
| C  | 0.93379500  | 3.49814800  | -2.76218100 |
| H  | 0.54733600  | 4.71087000  | -1.01778600 |
| H  | 1.35870600  | 2.07016500  | -4.31945400 |
| Cl | 0.62941800  | 4.81333600  | -3.90095900 |
| C  | -1.84062300 | -1.36391300 | 4.44946100  |
| C  | -1.68226500 | -0.37512300 | 5.47936400  |
| C  | -1.81818700 | 0.95882700  | 5.26537800  |
| C  | -2.13432000 | 1.39592800  | 3.92409200  |
| C  | -2.12866000 | -1.03790700 | 3.17153500  |
| C  | -1.24084300 | -2.39600100 | 6.34856700  |
| H  | -1.69511400 | 1.69362600  | 6.05173500  |
| H  | -2.22875800 | -1.80187700 | 2.40997500  |
| H  | -0.18087100 | -2.65262600 | 6.44780800  |
| H  | -1.86961300 | -2.98008800 | 7.02604200  |
| O  | -1.40640600 | -1.00130300 | 6.64560300  |
| O  | -1.66755600 | -2.60393100 | 5.00447300  |
| O  | -2.29543100 | 2.61203900  | 3.65314300  |
| C  | -2.26644000 | 0.36590100  | 2.84726200  |
| C  | -2.45508700 | 0.84352400  | 1.56838800  |
| H  | -2.50133100 | 1.92669900  | 1.47956500  |
| C  | -2.57260200 | 0.09251300  | 0.36104500  |
| H  | -2.56307900 | -0.99343800 | 0.41184300  |
| C  | -2.66375500 | 0.71497700  | -0.84745600 |
| H  | -2.63116100 | 1.80394400  | -0.85040700 |
| C  | -2.77709200 | 0.09503500  | -2.16023900 |
| C  | -2.98273500 | -1.28792600 | -2.35072100 |
| C  | -2.68039600 | 0.91655600  | -3.30206600 |
| C  | -3.08082600 | -1.82226800 | -3.63055300 |
| H  | -3.07799800 | -1.94469500 | -1.49110400 |
| C  | -2.77531000 | 0.37910000  | -4.58324800 |
| H  | -2.51664000 | 1.98286400  | -3.17024300 |
| C  | -2.97630300 | -0.99244600 | -4.75283300 |
| H  | -3.24344100 | -2.88922100 | -3.75762800 |
| H  | -2.69213800 | 1.03008900  | -5.44910700 |
| H  | -3.05444000 | -1.41416800 | -5.75116800 |

**TS-1**

E = -4156.051574 a.u.

|   |             |             |            |
|---|-------------|-------------|------------|
| C | 2.14914600  | 7.58291800  | 3.13553100 |
| C | 2.82041000  | 6.47247700  | 3.62677500 |
| C | 4.23969000  | 6.36526300  | 3.64693500 |
| C | 4.96632000  | 7.39685500  | 3.08596900 |
| C | 4.34252800  | 8.51663300  | 2.48220200 |
| C | 2.91312400  | 8.61760600  | 2.49415200 |
| C | 0.66273600  | 7.64880000  | 3.24131900 |
| C | -0.10469500 | 6.62310200  | 2.70940400 |
| C | -1.52756100 | 6.64928800  | 2.68233500 |
| C | -2.16085500 | 7.71955000  | 3.27941100 |
| C | -1.43973900 | 8.75550400  | 3.92558800 |
| C | -0.00718200 | 8.72519000  | 3.91950500 |
| H | 6.05197300  | 7.34676700  | 3.09785600 |
| H | -3.24670400 | 7.76591700  | 3.26590100 |
| C | 5.11040100  | 9.53607900  | 1.85562100 |
| C | 4.50009900  | 10.60212600 | 1.23674800 |
| C | 3.08744200  | 10.68642100 | 1.21470400 |
| C | 2.31557000  | 9.72313100  | 1.82638900 |
| C | 0.68590000  | 9.74535000  | 4.62915300 |
| C | 0.00263900  | 10.75202000 | 5.27578800 |
| C | -1.41137100 | 10.79823300 | 5.24914800 |
| C | -2.11368100 | 9.81606300  | 4.58969300 |
| O | 2.07908600  | 5.42358900  | 4.16191300 |
| O | 0.53154300  | 5.52800700  | 2.13881400 |
| P | 1.28978200  | 4.44675200  | 3.11537100 |
| O | 2.13022700  | 3.55468700  | 2.27963500 |
| O | 0.23320700  | 3.81021800  | 4.07974000 |
| H | -0.17887700 | 2.92955700  | 3.67813500 |
| C | 4.93839400  | 5.22497000  | 4.31121200 |
| C | 5.78156100  | 4.33127200  | 3.57001700 |
| C | 4.83029200  | 5.07913100  | 5.68303300 |
| C | 5.88905100  | 4.36718900  | 2.15158200 |
| C | 6.53639200  | 3.33956200  | 4.28381200 |
| C | 5.56595400  | 4.09340900  | 6.37922200 |
| C | 6.71696100  | 3.49579400  | 1.47952300 |
| H | 5.29043300  | 5.08116000  | 1.59724100 |
| C | 7.38811000  | 2.46241100  | 3.55853700 |
| C | 6.41274300  | 3.25041400  | 5.69576400 |

|   |             |             |             |
|---|-------------|-------------|-------------|
| C | 7.48294800  | 2.53928600  | 2.18817500  |
| H | 6.77539600  | 3.53562800  | 0.39523200  |
| H | 7.96036400  | 1.72051800  | 4.11094700  |
| H | 6.99663900  | 2.50132600  | 6.22584500  |
| H | 8.13530200  | 1.86001500  | 1.64588300  |
| C | -2.32999100 | 5.56058700  | 2.04852400  |
| C | -3.07362500 | 4.71860400  | 2.85443700  |
| C | -2.39627700 | 5.41524500  | 0.62286300  |
| C | -3.89762500 | 3.70944800  | 2.30366900  |
| C | -3.24355400 | 4.39803200  | 0.06877500  |
| C | -1.67593200 | 6.25343200  | -0.27211200 |
| C | -3.98407100 | 3.55434200  | 0.94030900  |
| C | -3.33120700 | 4.26451900  | -1.34435900 |
| H | -1.03980000 | 7.03325700  | 0.13336600  |
| C | -1.77742400 | 6.09272700  | -1.63678000 |
| H | -4.61702300 | 2.78226900  | 0.50932800  |
| C | -2.61316900 | 5.08834100  | -2.18145100 |
| H | -3.98646900 | 3.49835000  | -1.75321400 |
| H | -1.21666200 | 6.74424500  | -2.30157200 |
| H | -2.68770400 | 4.97476200  | -3.25951600 |
| H | -3.00842800 | 4.82783700  | 3.93289400  |
| H | -4.45790800 | 3.05697000  | 2.96731600  |
| H | 4.18312400  | 5.75159000  | 6.23833200  |
| H | 5.47040800  | 4.02015200  | 7.45932000  |
| H | 6.19420200  | 9.44818900  | 1.86587100  |
| H | 5.09664800  | 11.37204600 | 0.75523900  |
| H | 2.60605400  | 11.51690100 | 0.70536300  |
| H | 1.23500800  | 9.79845800  | 1.79178400  |
| H | 1.76862700  | 9.71922800  | 4.66863700  |
| H | 0.55581300  | 11.51521900 | 5.81655200  |
| H | -1.93735400 | 11.60112300 | 5.75832000  |
| H | -3.20095100 | 9.82845900  | 4.57464600  |
| C | 1.97958300  | -0.21416000 | 3.98631200  |
| C | 1.79006700  | -1.33471100 | 4.82616300  |
| C | 2.38201800  | -1.44924800 | 6.08349100  |
| C | 3.18775500  | -0.39107100 | 6.49753400  |
| C | 3.38915800  | 0.73613200  | 5.67962900  |
| C | 2.79311200  | 0.83851200  | 4.42433100  |
| C | 1.21108500  | -0.45419200 | 2.76837600  |
| C | 0.59668400  | -1.70332500 | 2.94688700  |

|    |             |             |             |
|----|-------------|-------------|-------------|
| H  | 2.22165100  | -2.32021400 | 6.71313300  |
| H  | 3.66700200  | -0.43803700 | 7.47148100  |
| H  | 4.02075900  | 1.54563200  | 6.03189600  |
| H  | 2.94897900  | 1.71565700  | 3.80320400  |
| H  | -0.05374100 | -2.25170800 | 2.28356900  |
| N  | 0.94452000  | -2.21819700 | 4.15086100  |
| H  | 0.60736100  | -3.09501300 | 4.52042900  |
| C  | 1.02153600  | 0.42048900  | 1.68465600  |
| H  | 1.53472400  | 1.37659300  | 1.71955400  |
| C  | 0.24984100  | 0.08721600  | 0.52676800  |
| H  | 0.19628100  | -0.98286900 | 0.32855600  |
| C  | 0.49635700  | 0.88414900  | -0.71090500 |
| C  | 0.64058300  | 2.28166300  | -0.67147300 |
| C  | 0.55727600  | 0.24446600  | -1.95786900 |
| C  | 0.84195400  | 3.01463700  | -1.83952800 |
| H  | 0.60744600  | 2.81100400  | 0.27539300  |
| C  | 0.76410100  | 0.96366800  | -3.13516500 |
| H  | 0.44471900  | -0.83518900 | -2.01368200 |
| C  | 0.90133900  | 2.34826100  | -3.06339100 |
| H  | 0.94379700  | 4.09319300  | -1.79546000 |
| H  | 0.81450400  | 0.45679100  | -4.09296900 |
| Cl | 1.15021300  | 3.27103700  | -4.54441400 |
| C  | -3.06306200 | -1.32046600 | 3.98817200  |
| C  | -2.54407900 | -0.45688800 | 4.97125100  |
| C  | -1.73633100 | 0.60806100  | 4.67299200  |
| C  | -1.45119500 | 0.84894100  | 3.28793700  |
| C  | -2.79785500 | -1.14997200 | 2.65553200  |
| C  | -3.94322000 | -1.89349800 | 5.95817800  |
| H  | -1.33118000 | 1.26506400  | 5.43412500  |
| H  | -3.23661200 | -1.81402900 | 1.91932100  |
| H  | -3.76244600 | -2.74455000 | 6.62028600  |
| H  | -4.94655400 | -1.47418900 | 6.12418500  |
| O  | -2.96132000 | -0.88270200 | 6.20822400  |
| O  | -3.81112600 | -2.30944000 | 4.60053500  |
| O  | -0.70413400 | 1.81828100  | 2.88894600  |
| C  | -1.98201900 | -0.04468300 | 2.27755300  |
| C  | -1.66910200 | 0.32185800  | 0.90637800  |
| H  | -1.61494900 | 1.40112200  | 0.78565000  |
| C  | -2.34637000 | -0.37388300 | -0.19862200 |
| H  | -2.53098100 | -1.44081200 | -0.08213200 |

|   |             |             |             |
|---|-------------|-------------|-------------|
| C | -2.70117700 | 0.23811800  | -1.34700400 |
| H | -2.45907500 | 1.29473600  | -1.45198600 |
| C | -3.37581000 | -0.36204300 | -2.50358300 |
| C | -3.98133800 | -1.63350200 | -2.47344300 |
| C | -3.42882700 | 0.36630700  | -3.70691600 |
| C | -4.59922200 | -2.15735600 | -3.60529500 |
| H | -3.98357200 | -2.20890000 | -1.55196800 |
| C | -4.04606900 | -0.15866500 | -4.84120000 |
| H | -2.96539100 | 1.34904800  | -3.74852800 |
| C | -4.63332400 | -1.42422800 | -4.79600000 |
| H | -5.06378700 | -3.13890400 | -3.55838400 |
| H | -4.06850500 | 0.42128200  | -5.75998100 |
| H | -5.11924300 | -1.83482300 | -5.67686100 |

# **Int1'**

E = -4156.082175 a.u.

|   |             |             |             |
|---|-------------|-------------|-------------|
| C | 2.29401800  | 7.36606000  | 2.37659800  |
| C | 3.14317700  | 6.37336300  | 2.84378800  |
| C | 4.55786200  | 6.40329100  | 2.67047400  |
| C | 5.08258800  | 7.44823000  | 1.93428200  |
| C | 4.26276700  | 8.43374400  | 1.33085000  |
| C | 2.84569700  | 8.39594500  | 1.53863600  |
| C | 0.84486200  | 7.33114600  | 2.73169100  |
| C | 0.09188500  | 6.20040300  | 2.45738500  |
| C | -1.30987500 | 6.11185000  | 2.68932200  |
| C | -1.92699800 | 7.19779300  | 3.27468100  |
| C | -1.20460500 | 8.35335800  | 3.66678400  |
| C | 0.20314000  | 8.42751400  | 3.40871200  |
| H | 6.15917700  | 7.51554100  | 1.80379000  |
| H | -2.99801400 | 7.16186200  | 3.45578900  |
| C | 4.82224000  | 9.45527700  | 0.51525500  |
| C | 4.01984400  | 10.38689900 | -0.10149000 |
| C | 2.61623700  | 10.32876700 | 0.07018100  |
| C | 2.04492200  | 9.36272400  | 0.86928900  |
| C | 0.90880300  | 9.56925700  | 3.88070600  |
| C | 0.25451900  | 10.59115000 | 4.53372900  |
| C | -1.14215300 | 10.53215300 | 4.75108900  |
| C | -1.85186500 | 9.43202700  | 4.32839500  |
| O | 2.60234400  | 5.31720900  | 3.57253200  |

|   |             |            |             |
|---|-------------|------------|-------------|
| O | 0.71621800  | 5.09191300 | 1.89085200  |
| P | 1.72635100  | 4.18606500 | 2.78900100  |
| O | 2.46027800  | 3.23218600 | 1.92495700  |
| O | 0.89842600  | 3.60760500 | 3.99860800  |
| H | 0.91130600  | 2.60719700 | 4.09840300  |
| C | 5.44960200  | 5.40170100 | 3.32391700  |
| C | 6.40507400  | 4.63762000 | 2.57106100  |
| C | 5.39690100  | 5.25322200 | 4.70025100  |
| C | 6.48425500  | 4.66939900 | 1.15000100  |
| C | 7.31274300  | 3.77637900 | 3.27750300  |
| C | 6.28155600  | 4.39287400 | 5.38613700  |
| C | 7.42270900  | 3.92488100 | 0.47039900  |
| H | 5.77825200  | 5.27876700 | 0.59700600  |
| C | 8.27365000  | 3.02808900 | 2.54383500  |
| C | 7.22892800  | 3.67830800 | 4.69081600  |
| C | 8.33513700  | 3.10126300 | 1.17190400  |
| H | 7.45530200  | 3.95825200 | -0.61489200 |
| H | 8.95830800  | 2.38596400 | 3.09353100  |
| H | 7.92315000  | 3.02322500 | 5.21213700  |
| H | 9.06704800  | 2.51585600 | 0.62259000  |
| C | -2.08749100 | 4.88298400 | 2.35571500  |
| C | -2.64167200 | 4.14737100 | 3.38811500  |
| C | -2.30019600 | 4.46990400 | 0.99858300  |
| C | -3.39842300 | 2.97901600 | 3.13820000  |
| C | -3.06426100 | 3.28092600 | 0.75080500  |
| C | -1.80348300 | 5.19650800 | -0.11802000 |
| C | -3.59830600 | 2.55133100 | 1.84656300  |
| C | -3.27621800 | 2.86156900 | -0.59056200 |
| H | -1.23761700 | 6.10635900 | 0.05306100  |
| C | -2.03130500 | 4.76520200 | -1.40585700 |
| H | -4.16187500 | 1.64377500 | 1.64673000  |
| C | -2.77089400 | 3.58290100 | -1.64745800 |
| H | -3.84609800 | 1.95213700 | -0.76501300 |
| H | -1.63793000 | 5.33437300 | -2.24384000 |
| H | -2.93681800 | 3.24853800 | -2.66793200 |
| H | -2.46727200 | 4.46280200 | 4.41272600  |
| H | -3.80343600 | 2.41516300 | 3.97354200  |
| H | 4.66834600  | 5.82435100 | 5.26704800  |
| H | 6.21419900  | 4.31093000 | 6.46751200  |
| H | 5.90081600  | 9.47637100 | 0.37859800  |



|    |             |             |             |
|----|-------------|-------------|-------------|
| H  | 4.45761000  | 11.15852400 | -0.72874000 |
| H  | 1.98177300  | 11.05035300 | -0.43727000 |
| H  | 0.96774000  | 9.32690400  | 0.98329100  |
| H  | 1.98071000  | 9.62735600  | 3.73338500  |
| H  | 0.81905500  | 11.44850400 | 4.89024000  |
| H  | -1.64675100 | 11.34798200 | 5.26131400  |
| H  | -2.92261700 | 9.36287500  | 4.50481900  |
| C  | -3.14296700 | -0.79847600 | 5.13179100  |
| C  | -4.12168500 | -1.61702500 | 5.75529200  |
| C  | -4.59472500 | -1.37158100 | 7.04882000  |
| C  | -4.06914200 | -0.27660800 | 7.72542800  |
| C  | -3.09586900 | 0.55116800  | 7.12742200  |
| C  | -2.62898400 | 0.30293200  | 5.84046300  |
| C  | -2.90114200 | -1.33796300 | 3.80678000  |
| C  | -3.72505700 | -2.44262900 | 3.69445700  |
| H  | -5.34514100 | -2.01030600 | 7.50786500  |
| H  | -4.41436600 | -0.05535300 | 8.73165300  |
| H  | -2.70609600 | 1.39912100  | 7.68414300  |
| H  | -1.86872400 | 0.94033400  | 5.39693900  |
| H  | -3.84460200 | -3.13513800 | 2.87301600  |
| N  | -4.45345200 | -2.60946900 | 4.85266600  |
| H  | -5.11685900 | -3.35036500 | 5.01707500  |
| C  | -1.98302100 | -0.77816300 | 2.82980900  |
| H  | -1.35527700 | 0.02530800  | 3.20737500  |
| C  | -1.85608700 | -1.15278200 | 1.53734600  |
| H  | -2.48817500 | -1.95775200 | 1.16005500  |
| C  | -0.95669600 | -0.56724700 | 0.54099000  |
| C  | -0.94499800 | -1.09415000 | -0.76465000 |
| C  | -0.10555100 | 0.52513400  | 0.80852700  |
| C  | -0.13041600 | -0.56403900 | -1.76317800 |
| H  | -1.58964700 | -1.93752400 | -1.00246000 |
| C  | 0.70842000  | 1.07283800  | -0.17763800 |
| H  | -0.07420100 | 0.96218000  | 1.80114100  |
| C  | 0.68928600  | 0.52079700  | -1.45981200 |
| H  | -0.13379500 | -0.98444900 | -2.76352800 |
| H  | 1.33983000  | 1.92384700  | 0.05579900  |
| Cl | 1.71832100  | 1.20586600  | -2.71832200 |
| C  | 2.91454900  | -2.09023700 | 6.01875200  |
| C  | 1.69796000  | -1.63513900 | 6.62041200  |
| C  | 0.96426000  | -0.59894700 | 6.13863700  |

|   |            |             |             |
|---|------------|-------------|-------------|
| C | 1.44173200 | 0.08210700  | 4.95218500  |
| C | 3.42505900 | -1.51594000 | 4.90869700  |
| C | 2.48338400 | -3.37342000 | 7.81216800  |
| H | 0.03826900 | -0.27537100 | 6.59702200  |
| H | 4.35004700 | -1.87373300 | 4.47285300  |
| H | 2.98834400 | -3.26035400 | 8.77743300  |
| H | 2.04846800 | -4.37427900 | 7.71155400  |
| O | 1.43850300 | -2.39742800 | 7.71321300  |
| O | 3.40746300 | -3.13914300 | 6.75450300  |
| O | 0.77227400 | 1.03411200  | 4.47082900  |
| C | 2.70878000 | -0.40052700 | 4.32480200  |
| C | 3.13339300 | 0.24167300  | 3.17763400  |
| H | 2.54168600 | 1.08982300  | 2.84647900  |
| C | 4.24918000 | -0.09218400 | 2.35616800  |
| H | 4.85834400 | -0.95627800 | 2.60970300  |
| C | 4.52060900 | 0.62632900  | 1.22848900  |
| H | 3.87734000 | 1.47932100  | 1.01996500  |
| C | 5.57056100 | 0.36632200  | 0.25463900  |
| C | 6.61390700 | -0.55987000 | 0.46552000  |
| C | 5.53784300 | 1.06574700  | -0.96907800 |
| C | 7.57769700 | -0.77992000 | -0.51206200 |
| H | 6.67726900 | -1.09862100 | 1.40622400  |
| C | 6.49851200 | 0.83722400  | -1.95121300 |
| H | 4.73732300 | 1.77833400  | -1.14700100 |
| C | 7.52300400 | -0.08497100 | -1.72605000 |
| H | 8.37636600 | -1.49427500 | -0.33073800 |
| H | 6.44685000 | 1.37712500  | -2.89267500 |
| H | 8.27550300 | -0.26309500 | -2.48956700 |

# **TS-1'**

E = -4156.043350 a.u.

|   |             |            |            |
|---|-------------|------------|------------|
| C | 2.20721600  | 7.40861900 | 2.70363600 |
| C | 2.94890300  | 6.33691800 | 3.17872100 |
| C | 4.35419700  | 6.20761900 | 2.98682200 |
| C | 4.98570600  | 7.18352700 | 2.24142800 |
| C | 4.27520400  | 8.25732200 | 1.64891300 |
| C | 2.86317000  | 8.37476200 | 1.86520800 |
| C | 0.75562800  | 7.50264800 | 3.03740300 |
| C | -0.08658000 | 6.43951300 | 2.74439700 |

|   |             |             |             |
|---|-------------|-------------|-------------|
| C | -1.49587300 | 6.48152700  | 2.94667700  |
| C | -2.02696700 | 7.61683100  | 3.52357400  |
| C | -1.21304500 | 8.70224500  | 3.93510300  |
| C | 0.20034500  | 8.64973400  | 3.70475400  |
| H | 6.06019500  | 7.12206900  | 2.09022600  |
| H | -3.10080600 | 7.67810900  | 3.68002300  |
| C | 4.93811500  | 9.21212000  | 0.83006600  |
| C | 4.23975600  | 10.22743700 | 0.21882800  |
| C | 2.83928900  | 10.32327100 | 0.39856100  |
| C | 2.16995100  | 9.42399600  | 1.19949200  |
| C | 0.99623200  | 9.72358400  | 4.19261900  |
| C | 0.42359200  | 10.79932500 | 4.83556300  |
| C | -0.97684900 | 10.86535500 | 5.02636200  |
| C | -1.77407500 | 9.83385800  | 4.58698600  |
| O | 2.29949000  | 5.35144800  | 3.91415200  |
| O | 0.44288100  | 5.28456600  | 2.18661600  |
| P | 1.37394900  | 4.28381900  | 3.09221300  |
| O | 2.07161300  | 3.32452000  | 2.20856700  |
| O | 0.47424200  | 3.73760800  | 4.25915900  |
| H | 0.39785100  | 2.71239300  | 4.27008900  |
| C | 5.12797300  | 5.09536900  | 3.61247300  |
| C | 5.87226600  | 4.16109100  | 2.81687400  |
| C | 5.16545100  | 4.99487600  | 4.99257400  |
| C | 5.83483000  | 4.14876000  | 1.39417000  |
| C | 6.67343600  | 3.17138900  | 3.48143400  |
| C | 5.94665600  | 4.01224000  | 5.63973500  |
| C | 6.56612200  | 3.23306000  | 0.67084700  |
| H | 5.20227400  | 4.86257900  | 0.87857400  |
| C | 7.42089800  | 2.24636800  | 2.70229600  |
| C | 6.69434000  | 3.12599800  | 4.89991000  |
| C | 7.37422100  | 2.27433100  | 1.32798700  |
| H | 6.51495100  | 3.23673700  | -0.41446800 |
| H | 8.02597900  | 1.50457000  | 3.21883300  |
| H | 7.30572800  | 2.37175100  | 5.39004800  |
| H | 7.93993900  | 1.55405300  | 0.74377000  |
| C | -2.38350800 | 5.33677600  | 2.58672800  |
| C | -3.06547000 | 4.68411400  | 3.59787300  |
| C | -2.59054200 | 4.93594000  | 1.22363500  |
| C | -3.95710800 | 3.62160400  | 3.32042100  |
| C | -3.48949700 | 3.85129300  | 0.94825000  |

|   |             |             |             |
|---|-------------|-------------|-------------|
| C | -1.96386500 | 5.58476500  | 0.12435700  |
| C | -4.16069100 | 3.20914500  | 2.02403000  |
| C | -3.70319900 | 3.45221900  | -0.39919000 |
| H | -1.29534900 | 6.41737500  | 0.31433500  |
| C | -2.19658300 | 5.17651000  | -1.17093600 |
| H | -4.84669600 | 2.39498900  | 1.80118900  |
| C | -3.07131900 | 4.09584000  | -1.43841900 |
| H | -4.38220100 | 2.62538200  | -0.59442200 |
| H | -1.70707300 | 5.68860700  | -1.99494000 |
| H | -3.24156600 | 3.77946100  | -2.46370100 |
| H | -2.89665300 | 4.98565300  | 4.62721400  |
| H | -4.48003400 | 3.13758400  | 4.14112400  |
| H | 4.59077400  | 5.69578000  | 5.59060700  |
| H | 5.95769900  | 3.96938600  | 6.72547200  |
| H | 6.01158700  | 9.11434500  | 0.68655800  |
| H | 4.75615400  | 10.94720900 | -0.41030100 |
| H | 2.28489500  | 11.11108500 | -0.10431700 |
| H | 1.09593400  | 9.50662000  | 1.31879700  |
| H | 2.07158900  | 9.68470500  | 4.06484700  |
| H | 1.05545100  | 11.60261000 | 5.20482300  |
| H | -1.41598900 | 11.72262900 | 5.52912900  |
| H | -2.85003000 | 9.86117600  | 4.74238000  |
| C | -2.19600200 | -1.02984000 | 4.57752100  |
| C | -2.17989500 | -2.08364700 | 5.52063100  |
| C | -3.12880900 | -2.20444000 | 6.53654000  |
| C | -4.11692300 | -1.22559400 | 6.59986800  |
| C | -4.14721700 | -0.16217000 | 5.67807400  |
| C | -3.19507800 | -0.05280900 | 4.66820700  |
| C | -1.06887400 | -1.23790900 | 3.67804600  |
| C | -0.42522900 | -2.39164200 | 4.13727600  |
| H | -3.09785200 | -3.02277300 | 7.25060500  |
| H | -4.87378600 | -1.28216800 | 7.37693700  |
| H | -4.92768400 | 0.58899400  | 5.76227200  |
| H | -3.22048200 | 0.78158100  | 3.97350200  |
| H | 0.45639100  | -2.88540800 | 3.75840400  |
| N | -1.08768500 | -2.89242400 | 5.21412400  |
| H | -0.79801500 | -3.70207100 | 5.74231800  |
| C | -0.64418900 | -0.40133900 | 2.62344300  |
| H | -1.25875100 | 0.46130000  | 2.39487900  |
| C | 0.45977200  | -0.69377500 | 1.76945500  |

|    |            |             |             |
|----|------------|-------------|-------------|
| H  | 0.72097100 | -1.75088100 | 1.73859400  |
| C  | 0.45389400 | -0.06891800 | 0.41304300  |
| C  | 0.69496600 | -0.85561800 | -0.72259900 |
| C  | 0.21427000 | 1.30239000  | 0.23344600  |
| C  | 0.67427300 | -0.30580500 | -2.00412700 |
| H  | 0.89617800 | -1.91793100 | -0.60789800 |
| C  | 0.19054800 | 1.86878100  | -1.03976400 |
| H  | 0.07900300 | 1.94912400  | 1.09338400  |
| C  | 0.41553200 | 1.05575000  | -2.15002300 |
| H  | 0.85631800 | -0.92487900 | -2.87618700 |
| H  | 0.00332800 | 2.92984900  | -1.16097000 |
| Cl | 0.38099000 | 1.76092300  | -3.76525000 |
| C  | 2.84184200 | -1.44592900 | 6.05206400  |
| C  | 1.92589500 | -0.68272400 | 6.80100500  |
| C  | 1.06433500 | 0.21343700  | 6.22707600  |
| C  | 1.15021700 | 0.39322600  | 4.80634800  |
| C  | 2.94166900 | -1.33674400 | 4.69044500  |
| C  | 3.21556500 | -1.83198100 | 8.21857900  |
| H  | 0.35118900 | 0.79319700  | 6.80124300  |
| H  | 3.68146200 | -1.91057600 | 4.14379700  |
| H  | 4.04285300 | -1.23315700 | 8.62721600  |
| H  | 3.00869900 | -2.69653200 | 8.85512800  |
| O  | 2.04181400 | -1.01907200 | 8.12845800  |
| O  | 3.54478900 | -2.27657700 | 6.90397100  |
| O  | 0.36652000 | 1.19596500  | 4.17019300  |
| C  | 2.09721100 | -0.39179000 | 4.04055000  |
| C  | 2.13978200 | -0.09276100 | 2.62158400  |
| H  | 1.94876300 | 0.95979800  | 2.42168100  |
| C  | 3.19125000 | -0.68030200 | 1.77984600  |
| H  | 3.46827600 | -1.71794000 | 1.96277300  |
| C  | 3.78366900 | 0.00602800  | 0.78130700  |
| H  | 3.45714400 | 1.03115800  | 0.61250500  |
| C  | 4.83263400 | -0.47859600 | -0.12237200 |
| C  | 5.56792000 | -1.65787000 | 0.10638700  |
| C  | 5.12514700 | 0.26760400  | -1.27949300 |
| C  | 6.54356900 | -2.07818900 | -0.79329800 |
| H  | 5.38754300 | -2.23963800 | 1.00590800  |
| C  | 6.09941800 | -0.15444900 | -2.18285300 |
| H  | 4.56867300 | 1.18165600  | -1.46982300 |
| C  | 6.81333300 | -1.33045900 | -1.94415600 |

|   |            |             |             |
|---|------------|-------------|-------------|
| H | 7.10233100 | -2.98911200 | -0.59405700 |
| H | 6.30088100 | 0.43520400  | -3.07335000 |
| H | 7.57675400 | -1.66001600 | -2.64377000 |
